# Supplementary material
Source: publisher figshare collection journal article supplement (https://acs.figshare.com/ndownloader/files/21897453)
Supplement: Supplementary file 1 [file 21897453]

# Investigation into the Organobismuth Dismutation and Its Use for Rational Synthesis of Heteroleptic Triarylbismuthines, $\text{Ar}^1_2\text{Ar}^2\text{Bi}$

Thomas Louis-Goff,<sup>†</sup> Arnold L. Rheingold,<sup>‡</sup> and Jakub Hyvl\*,<sup>†</sup>

<sup>†</sup>Department of Chemistry, University of Hawai'i at Mānoa, 2545 McCarthy Mall, Honolulu, Hawaii 96822, United States

<sup>‡</sup>Department of Chemistry, University of California, San Diego, 9500 Gilman Drive, La Jolla, California 92093, United States

Contact: hyvl@hawaii.edu

1. General Comments on Experimental Details - S2
2. Experimental Details for the Synthesis of Organobismuths, **2** and **3** - S3
3. Experimental Details for the Preparation of Various Organometallic Reagents and their use in the Synthesis of Diphenyl(4-(dimethoxymethyl)phenyl)bismuthane (**1a**) in Table 1 – S4
4. Experimental Details for the Investigation of Dismutation, Table S1 – S5
5. Experimental Details for the Synthesis of Heteroleptic Triarylbismuthanes **1** – S6
6. EA Reports and NMR Spectra for **3b**, Figures S1-S5 - S13
7. EA Reports, NMR Spectra, and HPLC Chromatograms for Compounds **1**, Figures S6-S78 – S18
8. HPLC Chromatogram of tri(4-methoxyphenyl)bismuthane, di(4-methoxyphenyl)phenylbismuthane **1j**, diphenyl(4-methoxyphenyl)bismuthane **1b**, and triphenylbismuthane, Figure S79 – S91
9. Crystal Structure Data for (4-cyanophenyl)(*p*-tolyl)bismuthane **1k**, Figure S80, Tables S2-S6 – S92
10. References – S100

## 1. General Comments on Experimental Section

All reactions were carried out under nitrogen atmosphere. All reagents and solvents were purchased from commercial suppliers.  $\text{BiCl}_3$  and  $\text{ZnCl}_2$  were purified by reflux with thionyl chloride, then dissolved in diethyl ether and filtered to remove impurities. *p*-Toluene-sulfonic acid monohydrate ( $p\text{-TsOH}\cdot\text{H}_2\text{O}$ ) was purified by co-distillation in toluene. All other reagents were used as purchased without further purification. Solvents were purified through an alumina column solvent system and further dried with molecular sieves. Column chromatography was performed with 35-70 mesh silica gel using flash column techniques or Combiflash©.NextGen System. Varian Unity Inova 500 MHz was used for recording the  $^1\text{H}$  and  $^{13}\text{C}$  NMR spectra. Chemical shifts for  $^1\text{H}$  and  $^{13}\text{C}$  and were given in part per million (ppm), referenced internally according to the residual solvent resonances. Coupling constants were given in Hertz (Hz) and the following abbreviations were used: s, singlet; d, doublet; t, triplet; m, multiplet.

Diphenylbismuth chloride ( $\text{Ph}_2\text{BiCl}$ )<sup>1</sup>, diphenylbismuth iodide ( $\text{Ph}_2\text{BiI}$ )<sup>2</sup> and dimesitylbismuth iodide **2b**<sup>2</sup> were prepared according to previously reported procedures.

$^{13}\text{C}$  DEPT spectra are color coded and reported as follows: Blue: DEPT 135; Green: DEPT 90; Red: DEPT 45.

### Instrumentation:

$^1\text{H}$ NMR and  $^{13}\text{C}$ NMR were collected on a Varian Unity Inova 500 MHz. EA samples were analyzed with a PerkinElmer 2400 Series II Analyzer at the University of Rochester by Bill Brennessel. HPLC chromatograms were collected on an Agilent 1200 series using a 25 minute 25:75 to 0:100  $\text{H}_2\text{O}$ :Acetonitrile gradient on a Discovery® C18 25cm x 4mm, 5 $\mu\text{m}$ .

## 2. Experimental Details for the Synthesis of Organobismuths, 2 and 3

### Diphenylbismuth tosylate (2a)

The synthetic protocol was modified from a previously reported procedure.<sup>3</sup> To a diethyl ether solution of triphenylbismuthane (20.0 g, 45.4 mmol) was added dropwise a solution of *p*-TsOH·H<sub>2</sub>O (8.64 g, 45.4 mmol) in diethyl ether. The reaction mixture was allowed to stir for 5-6 hours, then filtered and the collected solid washed two times with diethyl ether to afford 20.8 g, 86% **2a**.

### Phenylbismuth ditosylate (3a)

The protocol was modified from a previously reported procedure.<sup>3</sup> To a diethyl ether solution of triphenylbismuthane (1.0 g, 2.3 mmol in 10ml) was added dropwise a solution of *p*-TsOH·H<sub>2</sub>O (0.91 g, 4.7 mmol). The reaction mixture was stirred at 90 °C for 3 hours, then cooled to room temperature, filtered, and the collected solid washed two times with diethyl ether (40ml) affording quantitatively phenylbismuth ditosylate (**3a**).

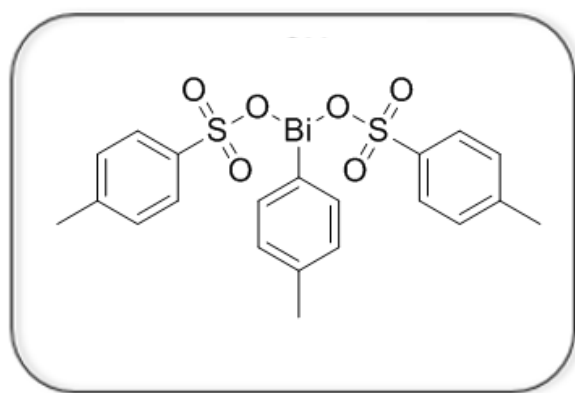

***p*-Tolylbismuth ditosylate (3b):** A solution of *p*-TsOH·H<sub>2</sub>O (2.22 g, 11.7 mmol) was added slowly to a solution of tri(*p*-tolyl)bismuthane (2.77 g, 5.75 mmol) in diethyl ether. The reaction mixture stirred at 90 °C for 5 hours, then cooled to room temperature, filtered, and the collected solid washed two times with diethyl ether (25ml) affording the product (3.65g, 5.69 mmol) in 99% yield.

White Powder. <sup>1</sup>H NMR (d<sub>6</sub>-DMSO): δ 8.57 (d, *J* = 7.6 Hz, 2H, C<sub>6</sub>H<sub>4</sub>-CH<sub>3</sub>, CH), 7.83 (d, *J* = 7.6 Hz, 2H, C<sub>6</sub>H<sub>4</sub>-CH<sub>3</sub>, CH), 7.48 (d, *J* = 7.7 Hz, 4H, ArSO<sub>3</sub>Bi, CH), 7.11 (d, *J* = 7.7 Hz, 4H, ArSO<sub>3</sub>Bi, CH), 2.28 (overlapping singlets, 9H, C<sub>6</sub>H<sub>4</sub>-CH<sub>3</sub>). <sup>13</sup>C NMR (d<sub>6</sub>-DMSO): δ 145.8, 138.2, 137.2, 136.8 (*Ar*-Bi, CH), 134.0 (*Ar*-Bi, CH), 132.7, 128.5 (*Ar*SO<sub>3</sub>Bi, CH), 125.9 (*Ar*SO<sub>3</sub>Bi, CH), 21.9 (C<sub>6</sub>H<sub>4</sub>-CH<sub>3</sub>), 21.2 (C<sub>6</sub>H<sub>4</sub>-CH<sub>3</sub>). **Anal. Calc. for BiO<sub>6</sub>C<sub>21</sub>H<sub>21</sub>S<sub>2</sub>:** C, 39.26; H, 3.29. Found: C, 38.87; H, 2.87.

**3b** did not pass EA in %H. EA was consistently low in %C and %H.

### 3. Experimental Details for the Preparation of Various Organometallic Reagents and their use in the Synthesis of Diphenyl(4-(dimethoxymethyl)phenyl)bismuthane (1a) in Table 1.

#### ArLi

4-bromobenzaldehyde dimethylacetal (260 mg, 1.12 mmol) was added to a Schlenk flask and dissolved in 5ml THF, then cooled to -78 °C. A solution of *n*-butyllithium in hexanes (1.12 mmol, 0.7 ml) was added dropwise to the reaction solution and stirred at -78 °C for 40 minutes. Then, diphenylbismuth tosylate (0.936 mmol) was added and the reaction mixture was allowed to warm to -10 °C. The final concentration was kept to 0.075 M of the nucleophile in THF. The reaction was stirred for 1 hour and 40 minutes. Afterwards, the reaction mixture was allowed to warm to ambient temperature.

#### Work-up

Then, the reaction mixture was quenched with a saturated solution of NaHCO<sub>3</sub> in distilled water and diluted with EtOAc (15ml), upon which the two phases were separated. The aqueous phase was washed twice with EtOAc (10ml). The combined organic phases were washed twice with sat. NaHCO<sub>3</sub> (10ml) and twice with sat. brine solution (10ml). Finally, the organic phase was dried over MgSO<sub>4</sub>, filtered through silica gel, and concentrated *in vacuo*. The crude reaction mixture was then purified by column chromatography using a 20:1 hexanes : ethyl acetate eluent.

#### [Ar<sub>2</sub>Cu]Li

To a freshly prepared solution of 4-lithium benzaldehyde dimethyl acetal solution (2.25 mmol, 0.075 M) at -78 °C was added CuI (1.12 mmol) and the solution was warmed to -40 °C and stirred for 1 hour. To this organocuprate reagent was added diphenyl bismuth tosylate (0.936 mmol) and warmed to -10 °C. The final concentration was kept to 0.075 M of the nucleophile in THF. The reaction was stirred for 1 hour and 40 minutes. Afterwards, the reaction was worked up as previously described.

#### ArMgBr

A modified preparation of Grignard reagent was utilized to prepare a stock solution of organomagnesium reagent. Magnesium turnings (7.9 g, 325 mmol) were added to a Schlenk bomb and to it was added 100ml THF. 4-Bromobenzaldehyde dimethylacetal (130 mmol) was dissolved in THF (50 ml) and added dropwise to the magnesium. The mixture was allowed to stir for 30 mins, then heated to 65 °C for 4 hours.

A solution of organomagnesium reagent (1.12 mmol) was cooled to -10 °C. To this solution was added diphenylbismuth tosylate (0.936 mmol) to give a final concentration of 0.075 M of the nucleophile in THF. The reaction was stirred for 1 hour and 40 minutes. Afterwards, the reaction was worked up as previously described.

#### [Ar<sub>2</sub>Cu]MgX

A solution of Grignard reagent (2.25 mmol) was cooled to -40 °C and to it was added CuI (1.12 mmol) and stirred for one hour. To this organocuprate reagent was added diphenylbismuth tosylate (0.936 mmol) to give a final concentration of 0.075 M of the nucleophile in THF. The reaction was warmed to -10 °C and stirred for 1 hour and 40 minutes. Afterwards, the reaction was worked up the same as previously described.

### [ArCuCN]MgX

A solution of organomagnesium reagent (1.12 mmol) was cooled to -40 °C and to it was added CuCN (1.12 mmol) and stirred for one hour. To this organocuprate reagent was added diphenylbismuth tosylate (0.936 mmol) to give a final concentration of 0.075 M of the nucleophile in THF. The reaction was warmed to -10 °C and stirred for 1 hour and 40 minutes. Afterwards, the reaction was worked up the same as previously described.

### ArZnX

To a solution of Grignard reagent (1.12 mmol) was added anhydrous ZnCl<sub>2</sub> (153 mg, 1.12 mmol) dissolved in 5 ml THF. The reaction was stirred at room temperature for about 10 minutes, then cooled to -10 °C. Next, diphenylbismuth tosylate (0.936 mmol) was added to the reaction mixture to give a final concentration of 0.075 M of the nucleophile in THF. The reaction was allowed to stir at -10 °C for 1 hour and 40 minutes. Afterwards, the reaction was worked up the same as previously described.

## 4. Experimental Details for the Investigation of Dismutation

### Investigation of Dismutation Initiated by 10mol% Additive (Scheme 2)

To a stirring THF (2mL) solution of diphenyl(4-methoxyphenyl)bismuthane **1b**, (100mg, 0.213 mmol), a THF (1mL) solution of 10mol% additive (0.0213 mmol) was added and stirred for one hour. After one hour, the mixture was filtered through Celite® and THF was removed *in vacuo* and the products were separated by Combiflash. The isolated yields are as follows (Ph<sub>2</sub>BiAnisyl (**1b**), Ph<sub>3</sub>Bi (A), Anisyl<sub>2</sub>BiPh (B), Anisyl<sub>3</sub>Bi (C)):

**Table S1: Recovery and Molar Ratio of Dismutation Side Products Initiated by 10 mol% Various Additives to diphenyl(4-methoxyphenyl)bismuthane 1b**

| Entry | Additive              | 1b<br>(mg) | A<br>(mg) | B<br>(mg) | C<br>(mg) | Recovery 1b% | 1b:A:B:C<br>(molar ratios) |
|-------|-----------------------|------------|-----------|-----------|-----------|--------------|----------------------------|
| 1     | PhMgBr                | 99         | -         | -         | -         | 99           | -                          |
| 2     | PhZnBr                | 98         | -         | -         | -         | 98           | -                          |
| 3     | MgCl <sub>2</sub>     | 95         | -         | -         | -         | 95           | -                          |
| 4     | ZnCl <sub>2</sub>     | 89         | -         | -         | -         | 89           | -                          |
| 5     | Ph <sub>2</sub> BiCl  | 30         | 23        | 16        | 3         | 30           | 11.3: 9.2: 5.7: 1          |
| 6     | Ph <sub>2</sub> BiI   | 43         | 35        | 14        | 2.7       | 43           | 17.5: 15.1: 5.6: 1         |
| 7     | Ph <sub>2</sub> BiOTs | 33         | 25        | 7         | 2         | 33           | 18.6: 15.1: 3.7: 1         |

### Investigation of Dismutation Initiated by the Slow Addition of Electrophile into Nucleophile

To a stirring THF (2mL) solution of nucleophile, *p*-MeOC<sub>6</sub>H<sub>4</sub>ZnX (0.408 mmol), a THF (0.25 mL) solution of diphenylbismuth iodide (50mg; 0.102 mmol), was added four times in half hour intervals to give a final volume of 3ml and an equimolar ratio of electrophile to nucleophile. After the final addition and stirring for 30 minutes, the reaction was then quenched with sat. NaHCO<sub>3</sub> aqueous solution and extracted with ethyl acetate 2x 10ml. The combined organic phase was washed with sat. NaHCO<sub>3</sub> (2x 10ml), dried

over  $\text{MgSO}_4$ , and the solvent was removed *in vacuo*. Finally, the crude product was purified through a silica gel plug and the products were separated by Combiflash. The isolated yields were as follows:  $\text{Ph}_2\text{BiAnisyl}$  (**1b**): 105mg (0.223 mmol, 55%);  $\text{Ph}_3\text{Bi}$  (A): 6mg (0.0136 mmol, 3%);  $\text{Anisyl}_2\text{BiPh}$  (B): 8mg (0.0160 mmol, 4%).

### Investigation of Dismutation Initiated by the Slow Addition of Nucleophile into Electrophile

To a stirring THF (2mL) solution of diphenylbismuth iodide (200mg; 0.408 mmol), a THF (0.25 mL) solution of nucleophile, *p*- $\text{MeOC}_6\text{H}_4\text{ZnX}$  (0.102 mmol), was added four times in half hour intervals to give a final volume of 3ml and an equimolar ratio of electrophile to nucleophile. After the final addition and stirring for 30 minutes, the reaction was then quenched with sat.  $\text{NaHCO}_3$  aqueous solution and extracted with ethyl acetate 2x 10ml. The combined organic phase was washed with sat.  $\text{NaHCO}_3$  (2x 10ml), dried over  $\text{MgSO}_4$ , and the solvent was removed *in vacuo*. Finally, the crude product was purified through a silica gel plug and the products were separated by Combiflash. The isolated yields were as follows:  $\text{Ph}_2\text{BiAnisyl}$  (**1b**): 60mg (0.128 mmol, 31%);  $\text{Ph}_3\text{Bi}$  (A): 42mg (0.0954 mmol, 23%);  $\text{Anisyl}_2\text{BiPh}$  (B): 23mg (0.0460 mmol, 11%).

## 5. Experimental Details for the Synthesis of Heteroleptic Triarylbismuthanes (1)

### General Procedure Utilizing Organozincs and Diarylbismuth Tosylate or Iodide (2) (Procedures A and B)

For compounds **1a**, **1c**, **1e**, **1f**, **1h**, organozinc reagent was prepared by the addition of anhydrous  $\text{ZnCl}_2$  (153 mg, 1.12 mmol) dissolved in 5 ml THF to a solution of Grignard reagent (1.12 mmol). For compounds **1b**, **1g**, an organozinc reagent was prepared by Knochel's TurboGrignard procedure.<sup>4</sup> Compound **1d** was prepared utilizing Rieke procedures.<sup>5</sup>

The volume of solution of organozinc reagent (1.12 mmol) was adjusted to a final volume of 15ml by addition of dry THF. The reagent was stirred at room temperature for about 10 minutes, then cooled to  $-10^\circ\text{C}$ . After that, diarylbismuth tosylate (Procedure A) or iodide (Procedure B) **2** (0.936 mmol) was added at once to a stirred organozinc solution. The reaction mixture was stirred for 1 hour and 40 minutes and allowed to warm to room temperature. Then, the reaction was quenched by addition of a saturated solution of  $\text{NaHCO}_3$  in distilled water and extracted with EtOAc (15ml). The aqueous phase was washed twice with EtOAc (10ml). The combined organic phases were washed twice with saturated  $\text{NaHCO}_3$  (10ml) and twice with saturated brine solution (10ml). Finally, the organic phase was dried over  $\text{MgSO}_4$ , filtered through silica gel and concentrated *in vacuo* affording crude product. Further purification or recrystallization methods are described below for each compound.

### General Procedure Utilizing Organozincs and Arylbismuth Ditosylates (3) (Procedure C)

Regarding compounds **1i** and **1k**, an organozinc reagent was prepared by Knochel protocol.<sup>4</sup> For compounds **1j** and **1l**, organozinc reagent was prepared by the addition of anhydrous  $\text{ZnCl}_2$  (293 mg, 2.15 mmol) dissolved in 5 ml THF to a solution of Grignard reagent (2.06 mmol).

The volume of the organozinc reagent (2.06 mmol) was adjusted by addition of THF to give a final volume of 15 ml, then subsequently cooled to -10 °C and stirred. The monoaryl bismuth ditosylate (0.936 mmol) was added at once to the stirred organozinc solution at -10 °C and the reaction mixture was stirred for 1 hour and 40 minutes and then allowed to warm to room temperature. The work up is identical to **Procedure A**. Further purification or recrystallization methods are described below for each compound.

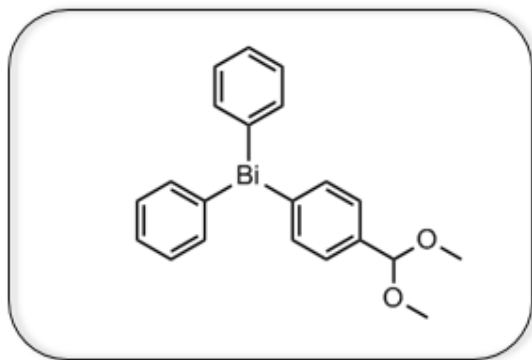

**Diphenyl(4-dimethoxymethylphenyl)bismuthane (1a):**

Yield: 94 %. This compound was obtained according to **procedure A** from (4-benzaldehyde dimethyl acetal)magnesium(II) bromide (1.123 mmol) and diphenyl bismuth tosylate (0.5 g, 0.936 mmol). Purified by chromatography and eluted with a gradient mixture of solvents (hexane/ethyl acetate 100/0 to 20/80).

White solid.  $^1\text{H NMR}$  ( $\text{CDCl}_3$ ):  $\delta$  7.78-7.75 (m, 6H,  $\text{C}_6\text{H}_5$ ), 7.48 (d,  $J = 7.9$  Hz, 2H,  $\text{C}_6\text{H}_4\text{-CH}(\text{OCH}_3)_2$ ), 7.40 (m, 4H, Ar), 7.35-7.32 (m, 2H,  $\text{C}_6\text{H}_5$ ), 5.37 (s, 1H,  $\text{C}_6\text{H}_4\text{-CH}(\text{OCH}_3)_2$ ), 3.35 (s, 6H,  $\text{C}_6\text{H}_4\text{-CH}(\text{OCH}_3)_2$ ).  $^{13}\text{C NMR}$  ( $\text{CDCl}_3$ ):  $\delta$  155.4, 155.0, 137.5, 137.5 (Ar, CH), 137.4 ( $\text{C}_6\text{H}_5$ , CH), 130.5 (Ar, CH), 128.7 ( $\text{C}_6\text{H}_4\text{-CH}(\text{OCH}_3)_2$ , CH), 127.7 ( $\text{C}_6\text{H}_5$ , CH), 103.3 ( $\text{C}_6\text{H}_4\text{-CH}(\text{OCH}_3)_2$ ), 52.8 ( $\text{C}_6\text{H}_4\text{-CH}(\text{OCH}_3)_2$ ). **Anal. Calc. for  $\text{BiO}_2\text{C}_{21}\text{H}_{21}$ :** C, 49.04; H, 4.12. Found: C, 48.76; H, 3.96.

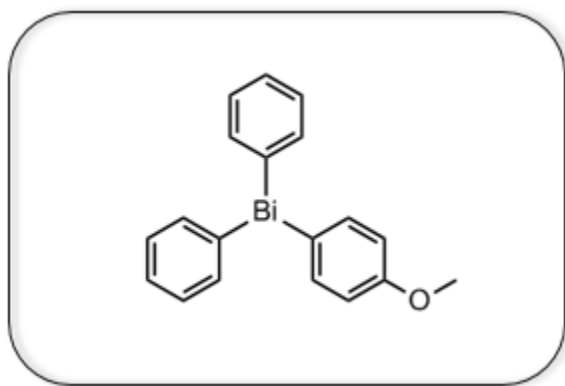

**Diphenyl(4-methoxyphenyl)bismuthane (1b):**

Yield: 99%. This compound was obtained according to **procedure A** from (4-methoxyphenyl)magnesium(II) bromide (1.123 mmol) and diphenylbismuth tosylate (0.5 g, 0.936 mmol). Purified by chromatography and eluted with a gradient mixture of solvents (hexane/ethyl acetate 100/0 to 95/5).

Yellowish oil.  $^1\text{H NMR}$  ( $\text{CDCl}_3$ ):  $\delta$  7.77 (d,  $J = 7.0$  Hz, 4H,  $\text{C}_6\text{H}_5$ ), 7.68 (d,  $J = 8.5$  Hz, 2H,  $\text{C}_6\text{H}_4\text{-OCH}_3$ ), 7.42 (d,  $J = 7.0$  Hz, 4H,  $\text{C}_6\text{H}_5$ ), 7.36-7.33 (m, 2H,  $\text{C}_6\text{H}_5$ ), 6.96 (d,  $J = 8.5$  Hz, 2H,  $\text{C}_6\text{H}_4\text{-OCH}_3$ ), 3.81 (s, 3H,  $\text{C}_6\text{H}_4\text{-OCH}_3$ ).  $^{13}\text{C NMR}$  ( $\text{CDCl}_3$ ):  $\delta$  159.3, 154.8, 145.7, 138.8 ( $\text{C}_6\text{H}_4\text{-OCH}_3$ , CH), 137.4 (Ph, CH), 130.4 (Ph, CH), 127.6 (Ph, CH), 116.4 ( $\text{C}_6\text{H}_4\text{-OCH}_3$ , CH), 55.0 ( $\text{C}_6\text{H}_4\text{-OCH}_3$ ). **Anal. Calc. for  $\text{BiOC}_{19}\text{H}_{17}$ :** C, 48.52; H, 3.64. Found: C, 48.65; H, 3.68.

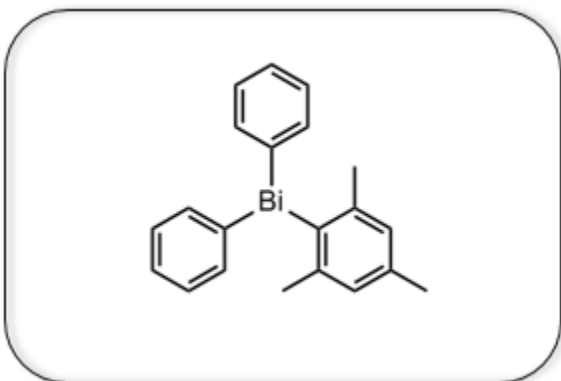

**Diphenyl(2-mesityl)bismuthane (1c):** Yield: 97%. This compound was obtained according to **procedure A** from (mesityl)magnesium(II) bromide (1.123 mmol) and diphenyl bismuth tosylate (0.5 g, 0.936 mmol). Recrystallized from cold hexanes.

White solid. **<sup>1</sup>H NMR (CDCl<sub>3</sub>):**  $\delta$  7.86 (d,  $J$  = 6.5 Hz, 4H, C<sub>6</sub>H<sub>5</sub>), 7.40-7.37 (m, 4H, C<sub>6</sub>H<sub>5</sub>), 7.32-7.29 (m, 2H, C<sub>6</sub>H<sub>5</sub>), 7.04 (s, 2H, C<sub>6</sub>H<sub>2</sub>), 2.31 (s, 3H, C<sub>6</sub>H<sub>2</sub>-*p*CH<sub>3</sub>), 2.26 (s, 6H, C<sub>6</sub>H<sub>2</sub>-*o*CH<sub>3</sub>). **<sup>13</sup>C NMR (CDCl<sub>3</sub>):**  $\delta$  157.4, 152.1, 146.2, 138.2, 137.5 (Ph, CH), 130.2 (Ph, CH), 129.3 (C<sub>6</sub>H<sub>2</sub>, CH), 127.4 (Ph, CH), 28.5 (C<sub>6</sub>H<sub>2</sub>-*o*CH<sub>3</sub>), 21.1 (C<sub>6</sub>H<sub>2</sub>-*p*CH<sub>3</sub>). **Anal. Calc. for BiC<sub>21</sub>H<sub>21</sub>:** C, 52.29; H, 4.39. Found: C, 52.19; H, 4.29.

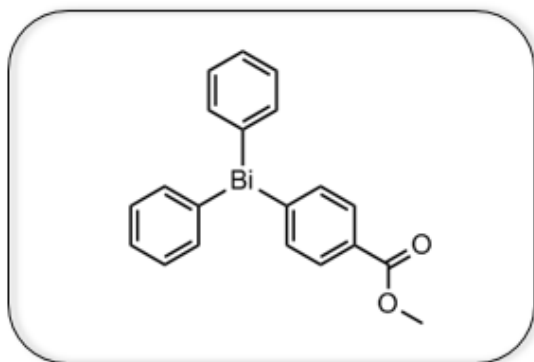

**Diphenyl(4-methoxycarbonylphenyl)bismuthane (1d):** Yield: 83%. This compound was obtained according to **procedure A** from (4-methoxycarbonylphenyl)zinc(II) halide (1.123 mmol) and diphenylbismuth tosylate (0.5 g, 0.936 mmol). Recrystallized from cold hexanes.

White solid. **<sup>1</sup>H NMR (CDCl<sub>3</sub>):**  $\delta$  8.02 (d,  $J$  = 8.1 Hz, 2H, C<sub>6</sub>H<sub>4</sub>-COOMe), 7.84 (d,  $J$  = 8.1 Hz, 2H, C<sub>6</sub>H<sub>4</sub>-COOMe), 7.74 (d,  $J$  = 6.6, Hz, 4H, C<sub>6</sub>H<sub>5</sub>), 7.43-7.40 (m, 4H, C<sub>6</sub>H<sub>5</sub>), 7.36-7.32 (m, 2H, C<sub>6</sub>H<sub>5</sub>), 3.91 (s, 3H, C<sub>6</sub>H<sub>4</sub>-COOCH<sub>3</sub>). **<sup>13</sup>C NMR (CDCl<sub>3</sub>):**  $\delta$  167.3, 161.6, 155.3, 137.6 (C<sub>6</sub>H<sub>4</sub>-COOMe, CH), 137.5 (Ph, CH), 131.0 (C<sub>6</sub>H<sub>4</sub>-COOMe, CH), 130.6 (Ph, CH), 129.4, 127.9 (Ph, CH), 52.1 (C<sub>6</sub>H<sub>4</sub>-COOCH<sub>3</sub>). **Anal. Calc. for BiO<sub>2</sub>C<sub>20</sub>H<sub>17</sub>:** C, 48.20; H, 3.44. Found: C, 48.60; H, 3.26.



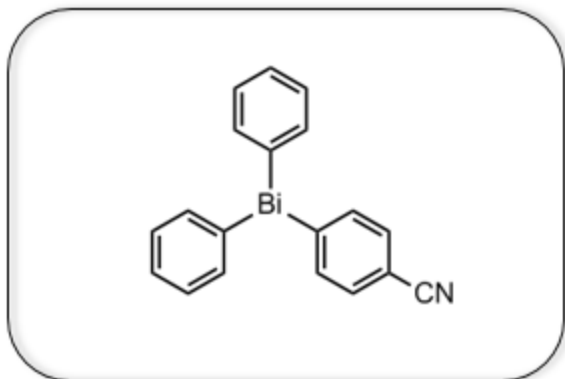

**Diphenyl(4-cyanophenyl)bismuthane (1e):** Yield: 84%. This compound was obtained according to **procedure A** from (4-cyanophenyl)zinc(II) halide (1.123 mmol) and diphenylbismuth tosylate (0.5 g, 0.936 mmol). Purified by column chromatography and eluted with a gradient mixture of solvents (hexane/ethyl acetate 100/0 to 25/75).

White solid.  $^1\text{H NMR}$  ( $\text{CDCl}_3$ ):  $\delta$  7.87 (d,  $J = 8.1$  Hz, 2H,  $\text{C}_6\text{H}_4\text{CN}$ ), 7.73 (d,  $J = 6.6$  Hz, 4H,  $\text{C}_6\text{H}_5$ ), 7.60 (d,  $J = 8.1$  Hz, 2H,  $\text{C}_6\text{H}_4\text{CN}$ ), 7.44 (t,  $J = 7.3$  Hz, 4H,  $\text{C}_6\text{H}_5$ ), 7.37 (m, 2H,  $\text{C}_6\text{H}_5$ ).  $^{13}\text{C NMR}$  ( $\text{CDCl}_3$ ):  $\delta$  161.5, 155.7, 138.1 ( $\text{C}_6\text{H}_4\text{CN}$ , CH), 137.4 (Ph, CH), 133.2 ( $\text{C}_6\text{H}_4\text{CN}$ , CH), 130.8 (Ph, CH), 128.1 (Ph, CH), 119.1, 111.3. **Anal. Calc. for  $\text{BiNC}_{19}\text{H}_{14}$ :** C, 49.04; H, 3.03; N, 3.01. Found: C, 49.14; H, 2.96; N, 2.93.

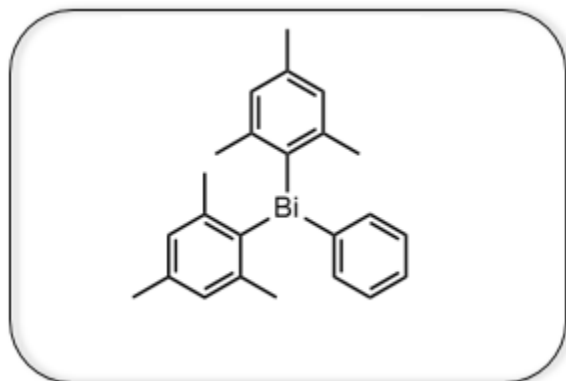

**Dimesitylphenylbismuthane (1f):** Yield: 94%. This compound was obtained according to **procedure B** from phenylmagnesium(II) bromide (1.123 mmol) and dimesitylbismuth iodide (0.537 g, 0.936 mmol mmol). Recrystallized from hexanes.

White solid.  $^1\text{H NMR}$  ( $\text{CDCl}_3$ ):  $\delta$  7.96 (d,  $J = 6.4$  Hz, 2H,  $\text{C}_6\text{H}_5$ ), 7.35-7.32 (m, 2H,  $\text{C}_6\text{H}_5$ ), 7.28 (d,  $J = 7.2$  Hz, 1H,  $\text{C}_6\text{H}_5$ ), 7.00 (s, 4H,  $\text{C}_6\text{H}_2$ ), 2.29 (overlapping singlets, 18H,  $\text{C}_6\text{H}_2\text{-CH}_3$ ).  $^{13}\text{C NMR}$  ( $\text{CDCl}_3$ ):  $\delta$  155.9, 150.6, 145.5, 138.7 (Ph, CH), 137.4, 129.8 (Ph, CH), 129.2 ( $\text{C}_6\text{H}_2$ , CH), 127.1 (Ph, CH), 27.9 ( $\text{C}_6\text{H}_2\text{-CH}_3$ ), 21.0 ( $\text{C}_6\text{H}_2\text{-CH}_3$ ). **Anal. Calc. for  $\text{BiC}_{24}\text{H}_{27}$ :** C, 54.96; H, 5.19. Found: C, 54.94; H, 4.80.

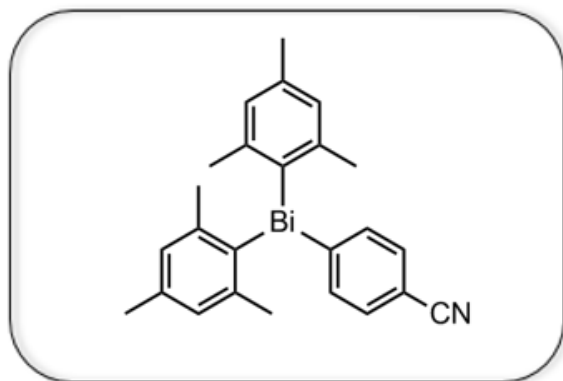

**Dimesityl(4-cyanophenyl)bismuthane (1g):** Yield: 92 %. This compound was obtained according to **procedure B** from (4-cyanophenyl)zinc(II) halide (1.123 mmol) and dimesitylbismuth iodide (0.537 g, 0.936 mmol). Recrystallized from hot ethanol.

White solid.  $^1\text{H NMR}$  ( $\text{CDCl}_3$ ):  $\delta$  8.03 (d,  $J = 8.0$  Hz, 2H,  $\text{C}_6\text{H}_4\text{CN}$ ), 7.51 (d,  $J = 8.0$  Hz, 2H,  $\text{C}_6\text{H}_4\text{CN}$ ), 7.01 (s, 4H,  $\text{C}_6\text{H}_2$ ), 2.27 (s, 6H,  $\text{C}_6\text{H}_2\text{-}p\text{CH}_3$ ), 2.22 (s, 12H,  $\text{C}_6\text{H}_2\text{-}o\text{CH}_3$ ).  $^{13}\text{C NMR}$  ( $\text{CDCl}_3$ ):  $\delta$  156.9, 156.6, 145.3, 139.3 ( $\text{C}_6\text{H}_4\text{CN}$ , CH), 138.0, 132.5 ( $\text{C}_6\text{H}_4\text{CN}$ , CH), 129.6 ( $\text{C}_6\text{H}_2$ , CH), 119.2, 110.7, 27.8 ( $\text{C}_6\text{H}_2\text{-}o\text{CH}_3$ ), 21.0 ( $\text{C}_6\text{H}_2\text{-}p\text{CH}_3$ ). **Anal. Calc. for  $\text{BiC}_{25}\text{H}_{26}\text{N}$ :** C, 54.65; H, 4.77; N, 2.35. Found: C, 54.83; H, 4.88; N, 2.40.

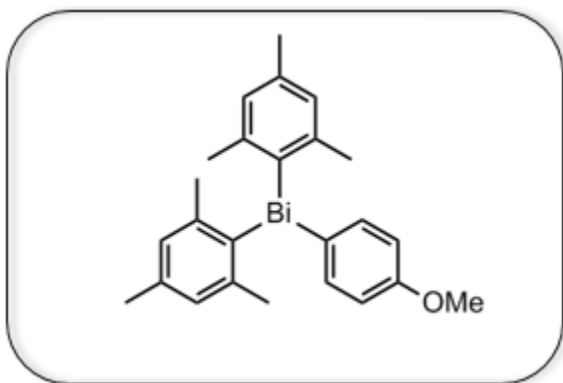

**Dimesityl(4-methoxyphenyl)bismuthane (1h):** Yield: 94%. This compound was obtained according to **procedure B** from (4-methoxyphenyl) magnesium(II) bromide (1.123 mmol) and dimesitylbismuth iodide (0.537 g, 0.936 mmol). Recrystallized from cold hexanes.

White solid.  $^1\text{H NMR}$  ( $\text{CDCl}_3$ ):  $\delta$  7.82 (d,  $J = 8.5$  Hz, 2H,  $\text{C}_6\text{H}_4\text{-OCH}_3$ ), 6.98 (s, 4H,  $\text{C}_6\text{H}_2$ ), 6.87 (d,  $J = 8.5$  Hz, 2H,  $\text{C}_6\text{H}_4\text{-OCH}_3$ ), 3.79 (s, 3H,  $\text{C}_6\text{H}_4\text{-OCH}_3$ ), 2.27 (overlapping singlets, 18H,  $\text{C}_6\text{H}_2\text{-CH}_3$ ).  $^{13}\text{C NMR}$  ( $\text{CDCl}_3$ ):  $\delta$  158.9, 155.5, 145.5, 140.6, 139.9 ( $\text{C}_6\text{H}_4\text{-OCH}_3$ , CH), 137.4, 129.1 ( $\text{C}_6\text{H}_2$ , CH), 115.8 ( $\text{C}_6\text{H}_4\text{-OCH}_3$ , CH), 54.9 ( $\text{C}_6\text{H}_4\text{-OCH}_3$ ), 27.8 ( $\text{C}_6\text{H}_2\text{-CH}_3$ ), 21.0 ( $\text{C}_6\text{H}_2\text{-CH}_3$ ). **Anal. Calc. for  $\text{BiOC}_{25}\text{H}_{29}$ :** C, 54.15; H, 5.27. Found: C, 54.10; H, 5.15.

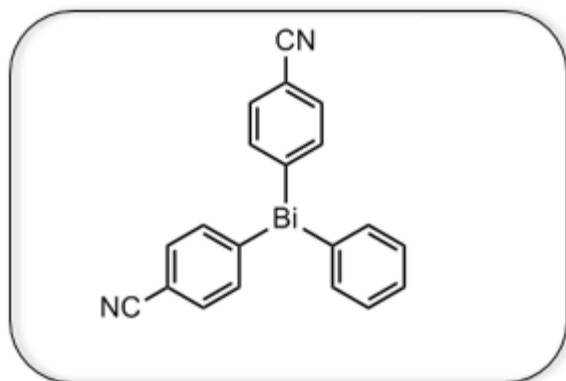

**Di(4-cyanophenyl)phenylbismuthane (1i):** Yield: 87%. This compound was obtained according to **procedure C** from (4-cyanophenyl)zinc(II) halide (2.06 mmol) and phenylbismuth ditosylate (0.587 g, 0.936 mmol). Recrystallized from toluene/hexanes.

White solid.  $^1\text{H NMR}$  ( $\text{CDCl}_3$ ):  $\delta$  7.84 (d,  $J = 8.0$  Hz, 4H,  $\text{C}_6\text{H}_4\text{CN}$ ), 7.69 (d,  $J = 6.5$  Hz, 2H,  $\text{C}_6\text{H}_5$ ), 7.64 (d,  $J = 8.0$  Hz, 4H,  $\text{C}_6\text{H}_4\text{CN}$ ), 7.49-7.46 (m, 2H,  $\text{C}_6\text{H}_5$ ), 7.43 – 7.37, (m, 1H,  $\text{C}_6\text{H}_5$ ).  $^{13}\text{C NMR}$  ( $\text{CDCl}_3$ ):  $\delta$  161.8, 156.3, 138.0 ( $\text{C}_6\text{H}_4\text{CN}$ , CH), 137.3 (Ph, CH), 133.5 ( $\text{C}_6\text{H}_4\text{CN}$ , CH), 131.2 (Ph, CH), 128.6 (Ph, CH), 118.8, 111.9. **Anal. Calc. for  $\text{BiN}_2\text{C}_{20}\text{H}_{13}$ :** C, 48.99; H, 2.67; N, 5.71. Found: C, 49.15; H, 2.62; N, 5.87.

The synthesis of this compound was attempted through **procedure A** utilizing phenyl magnesium bromide and bis(4-cyanophenyl)bismuth tosylate. The yield for this reaction was only 45%, as the corresponding tosylate was not obtained in analytical purity.

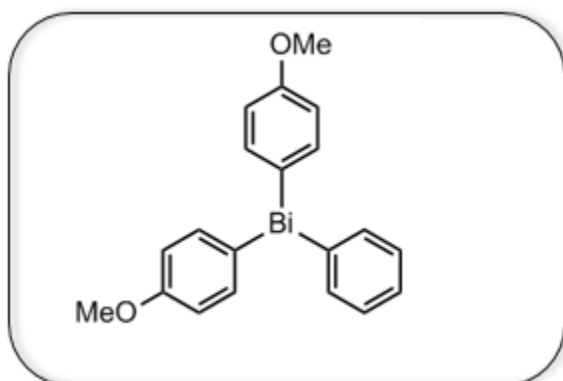

**Di(4-methoxyphenyl)phenylbismuthane (1j):** Yield: 91%. This compound was obtained according to **procedure C** from (4-methoxyphenyl)magnesium(II) bromide (2.06 mmol) and phenylbismuth ditosylate (0.587 g, 0.936 mmol). Purified by column chromatography and eluted with a gradient mixture of solvents (hexane/ethyl acetate 100/0 to 25/75).

White solid.  $^1\text{H NMR}$  ( $\text{CDCl}_3$ ):  $\delta$  7.74 (d,  $J = 7.5$ , 2H,  $\text{C}_6\text{H}_5$ ), 7.64 (d,  $J = 8.6$ , 4H,  $\text{C}_6\text{H}_4\text{-OCH}_3$ ), 7.40-7.37 (m,  $J = 7.5$ , 2H,  $\text{C}_6\text{H}_5$ ), 7.34-7.31, (m, 1H,  $\text{C}_6\text{H}_5$ ), 6.94, (d,  $J = 8.6$ , 4H,  $\text{C}_6\text{H}_4\text{-OCH}_3$ ), 3.80 (s, 6H,  $\text{C}_6\text{H}_4\text{-OCH}_3$ ).  $^{13}\text{C NMR}$  ( $\text{CDCl}_3$ ): 159.3, 154.6, 145.3, 138.8 ( $\text{C}_6\text{H}_4\text{-OCH}_3$ , CH), 137.4 (Ph, CH), 130.3 (Ph, CH), 127.6 (Ph, CH), 116.3 ( $\text{C}_6\text{H}_4\text{-OCH}_3$ , CH), 55.0 ( $\text{C}_6\text{H}_4\text{-OCH}_3$ ). **Anal. Calc. for  $\text{BiO}_2\text{C}_{20}\text{H}_{19}$ :** C, 48.01; H, 3.83. Found: C, 48.24; H, 3.66.

The synthesis of this compound was attempted through **procedure A** utilizing phenyl magnesium bromide and bis(4-methoxyphenyl)bismuth tosylate. The yield for this reaction was 87%, however the corresponding tosylate was not obtained in analytical purity.

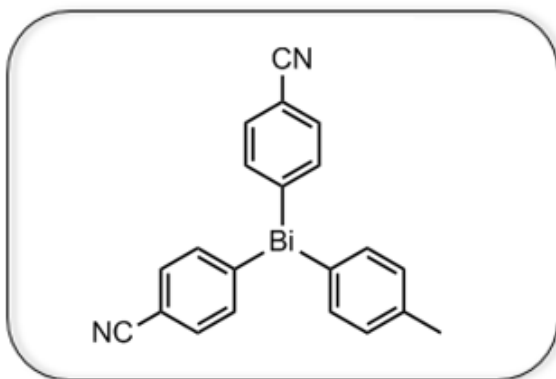

**Di(4-cyanophenyl)(*p*-tolyl)bismuthane (1k):** Yield: 87%. This compound was obtained according to **procedure C** from (4-cyanophenyl)zinc(II) iodide (2.06 mmol) and (*p*-tolyl)bismuth ditosylate (0.547 g, 0.936 mmol). Purified by column chromatography and eluted with a gradient mixture of solvents (hexane/ethyl acetate 100/0 to 25/75).

White solid.  $^1\text{H NMR}$  ( $\text{CDCl}_3$ ):  $\delta$  7.84 (d,  $J = 8.2$  Hz, 4H,  $\text{C}_6\text{H}_4\text{CN}$ ), 7.63 (d,  $J = 8.2$  Hz, 4H,  $\text{C}_6\text{H}_4\text{CN}$ ), 7.57 (d,  $J = 7.8$  Hz, 2H,  $\text{C}_6\text{H}_4\text{-}p\text{CH}_3$ ), 7.29 (d,  $J = 7.8$  Hz, 2H,  $\text{C}_6\text{H}_4\text{-}p\text{CH}_3$ ), 2.35 (s, 3H,  $\text{C}_6\text{H}_4\text{-CH}_3$ ).  $^{13}\text{C NMR}$  ( $\text{CDCl}_3$ ):  $\delta$  161.6, 152.8, 138.6, 138.0 ( $\text{C}_6\text{H}_4\text{CN}$ , CH), 137.3 ( $\text{C}_6\text{H}_4\text{-}p\text{CH}_3$ , CH), 133.5 ( $\text{C}_6\text{H}_4\text{CN}$ , CH), 132.0 ( $\text{C}_6\text{H}_4\text{-}p\text{CH}_3$ , CH), 118.8, 111.7, 21.5 ( $\text{C}_6\text{H}_4\text{-}p\text{CH}_3$ ). **Anal. Calc. for  $\text{BiN}_2\text{C}_{21}\text{H}_{15}$ :** C, 50.01; H, 3.00; N, 5.55. Found: C, 50.01; H, 2.87; N, 5.46.

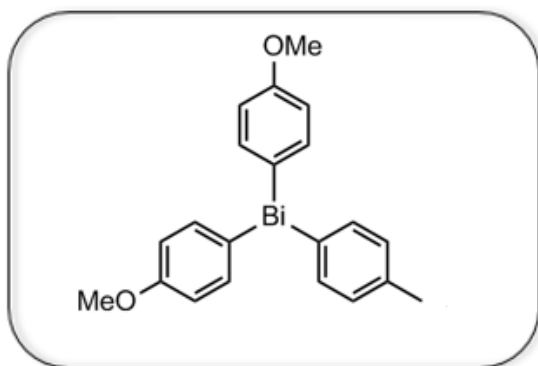

**Di(4-methoxyphenyl)(*p*-tolyl)bismuthane (1l):** Yield: 52 %. This compound was obtained according to **procedure C** from (4-methoxyphenyl)magnesium(II) bromide (2.06 mmol) and (*p*-tolyl) bismuth ditosylate (0.547 g, 0.936 mmol). Purified by column chromatography and eluted with a gradient mixture of solvents (hexane/ethyl acetate 100/0 to 20/80).

White solid.  $^1\text{H NMR}$  ( $\text{CDCl}_3$ ):  $\delta$  7.65-7.61 (m, 6H, Ar), 7.20 (d,  $J = 7.5$  Hz, 2H,  $\text{C}_6\text{H}_4\text{-}p\text{CH}_3$ ), 6.93 (d,  $J = 8.4$  Hz, 4H,  $\text{C}_6\text{H}_4\text{-OCH}_3$ ), 3.80 (s, 6H,  $\text{C}_6\text{H}_4\text{-OCH}_3$ ), 2.34 (s, 3H,  $\text{C}_6\text{H}_4\text{-CH}_3$ ).  $^{13}\text{C NMR}$  ( $\text{CDCl}_3$ ):  $\delta$  159.2, 150.9, 145.1, 138.7 ( $\text{C}_6\text{H}_4\text{-OCH}_3$ , CH), 137.4 ( $\text{C}_6\text{H}_4\text{-}p\text{CH}_3$ , CH), 137.3, 131.2 ( $\text{C}_6\text{H}_4\text{-}p\text{CH}_3$ , CH), 116.3 ( $\text{C}_6\text{H}_4\text{-OCH}_3$ , CH), 55.0 ( $\text{C}_6\text{H}_4\text{-OCH}_3$ ), 21.5 ( $\text{C}_6\text{H}_4\text{-CH}_3$ ). **Anal. Calc. for  $\text{BiO}_2\text{C}_{21}\text{H}_{21}$ :** C, 49.04; H, 4.12. Found: C, 49.06; H, 3.90

## 6. EA Report and NMR Spectra for 3b

### NMR Spectra and EA Report of Compound 3b

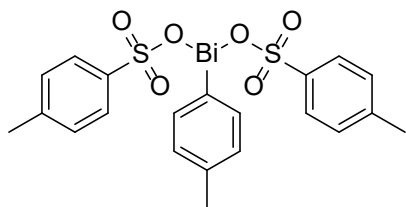

Chemical Formula:  $\text{BiO}_6\text{C}_{21}\text{H}_{21}\text{S}_2$

Molecular Weight: 642.49

Elemental Analysis: C: 39.26; Bi: 32.53; H: 3.29; O: 14.94; S: 9.98

CENTC Elemental Analysis Facility  
University of Rochester  
Rochester, NY 14627 USA  
Email: ealab@chem.rochester.edu

|                |                      |         |               |
|----------------|----------------------|---------|---------------|
| Date of report | 8/2/2019 5:06:03PM   |         |               |
| User ID        | Administrator        |         |               |
| Comments       | TLG 2-67 [HvM]       |         |               |
| DATE & TIME    | 8/2/2019 11:53:35 AM | P_ID    | EA LAB        |
| SAMPLE ID      | 19483                | USER ID | Administrator |
| WEIGHT (mg)    | 2.376                | MODE    | CHN           |
|                | CARBON               | 38.872% |               |
|                | HYDROGEN             | 2.867%  |               |
|                | NITROGEN             | 0.040%  |               |

#### Acknowledgment

Analytical data were obtained from the CENTC Elemental Analysis Facility at the University of Rochester, funded by NSF CHE-0650456.

#### Instrumentation

Microanalysis samples were weighed with a PerkinElmer Model AD6000 Autobalance and their compositions were determined with a PerkinElmer 2400 Series II Analyzer.

Figure S1. EA Report of 3b

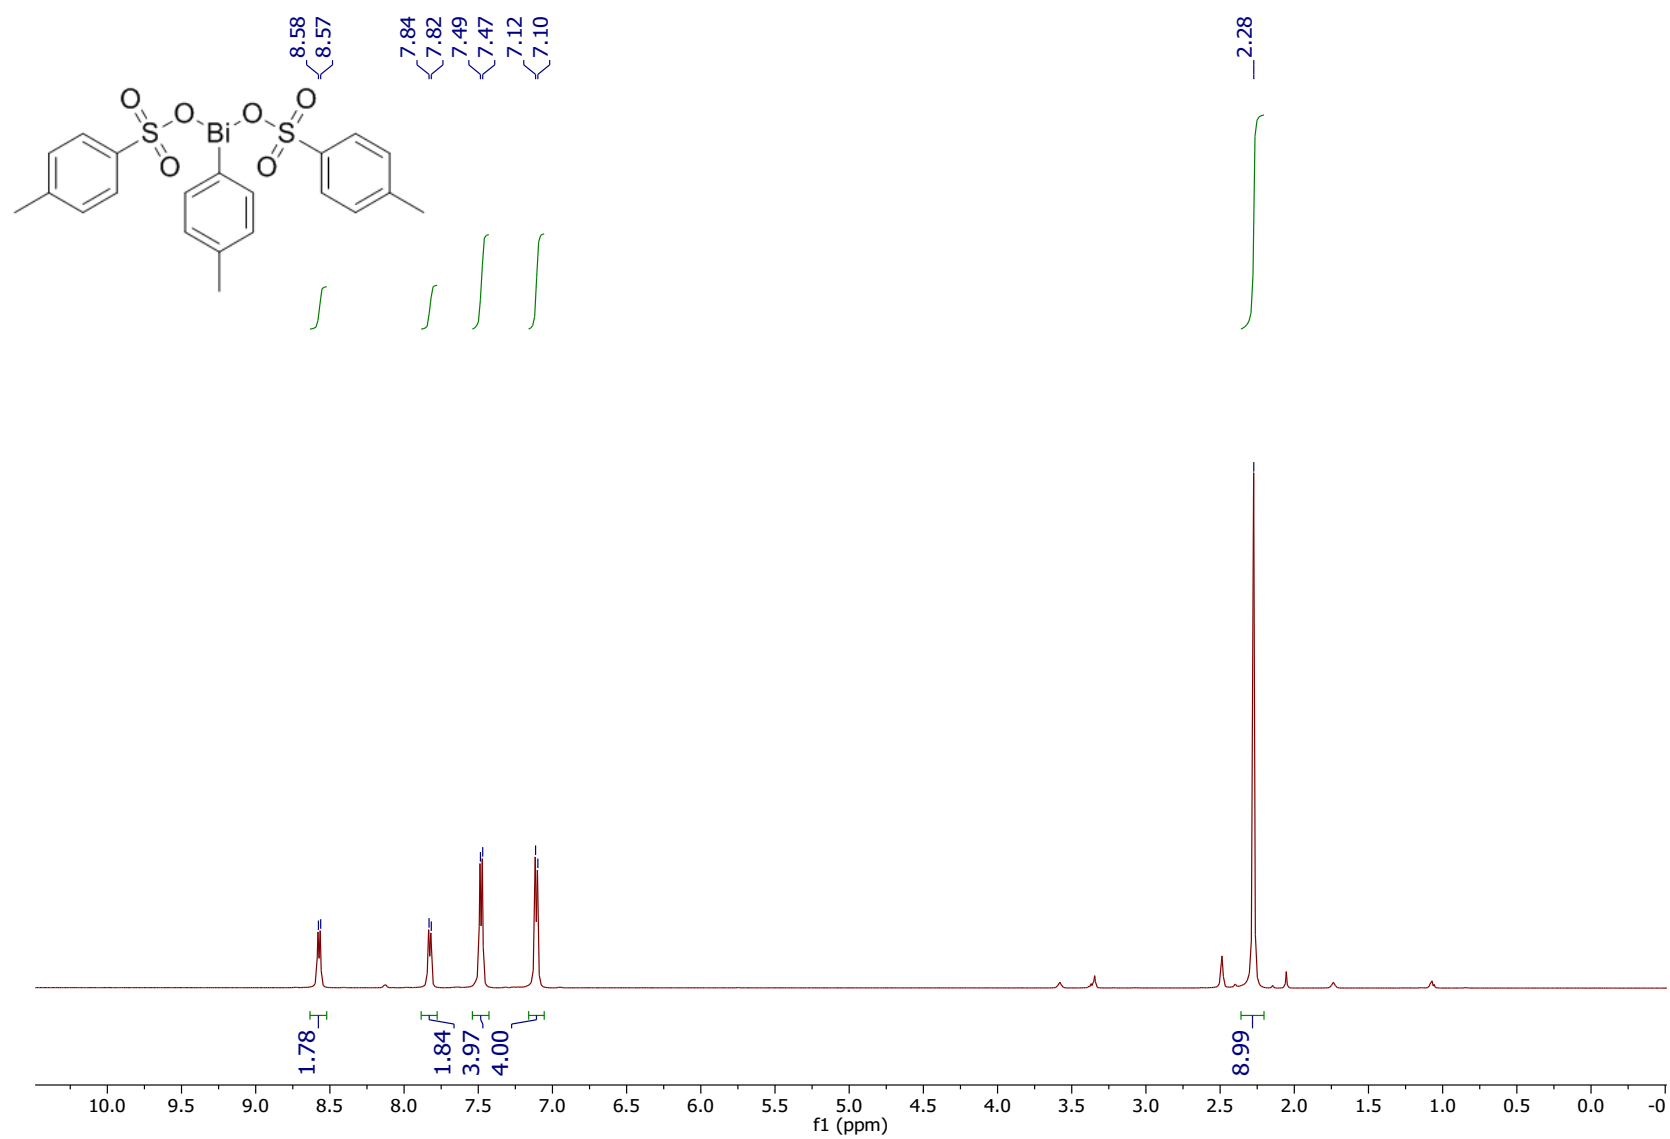

**Figure S2.**  $^1\text{H}$ NMR of **3b** in  $\text{d}_6$ -DMSO

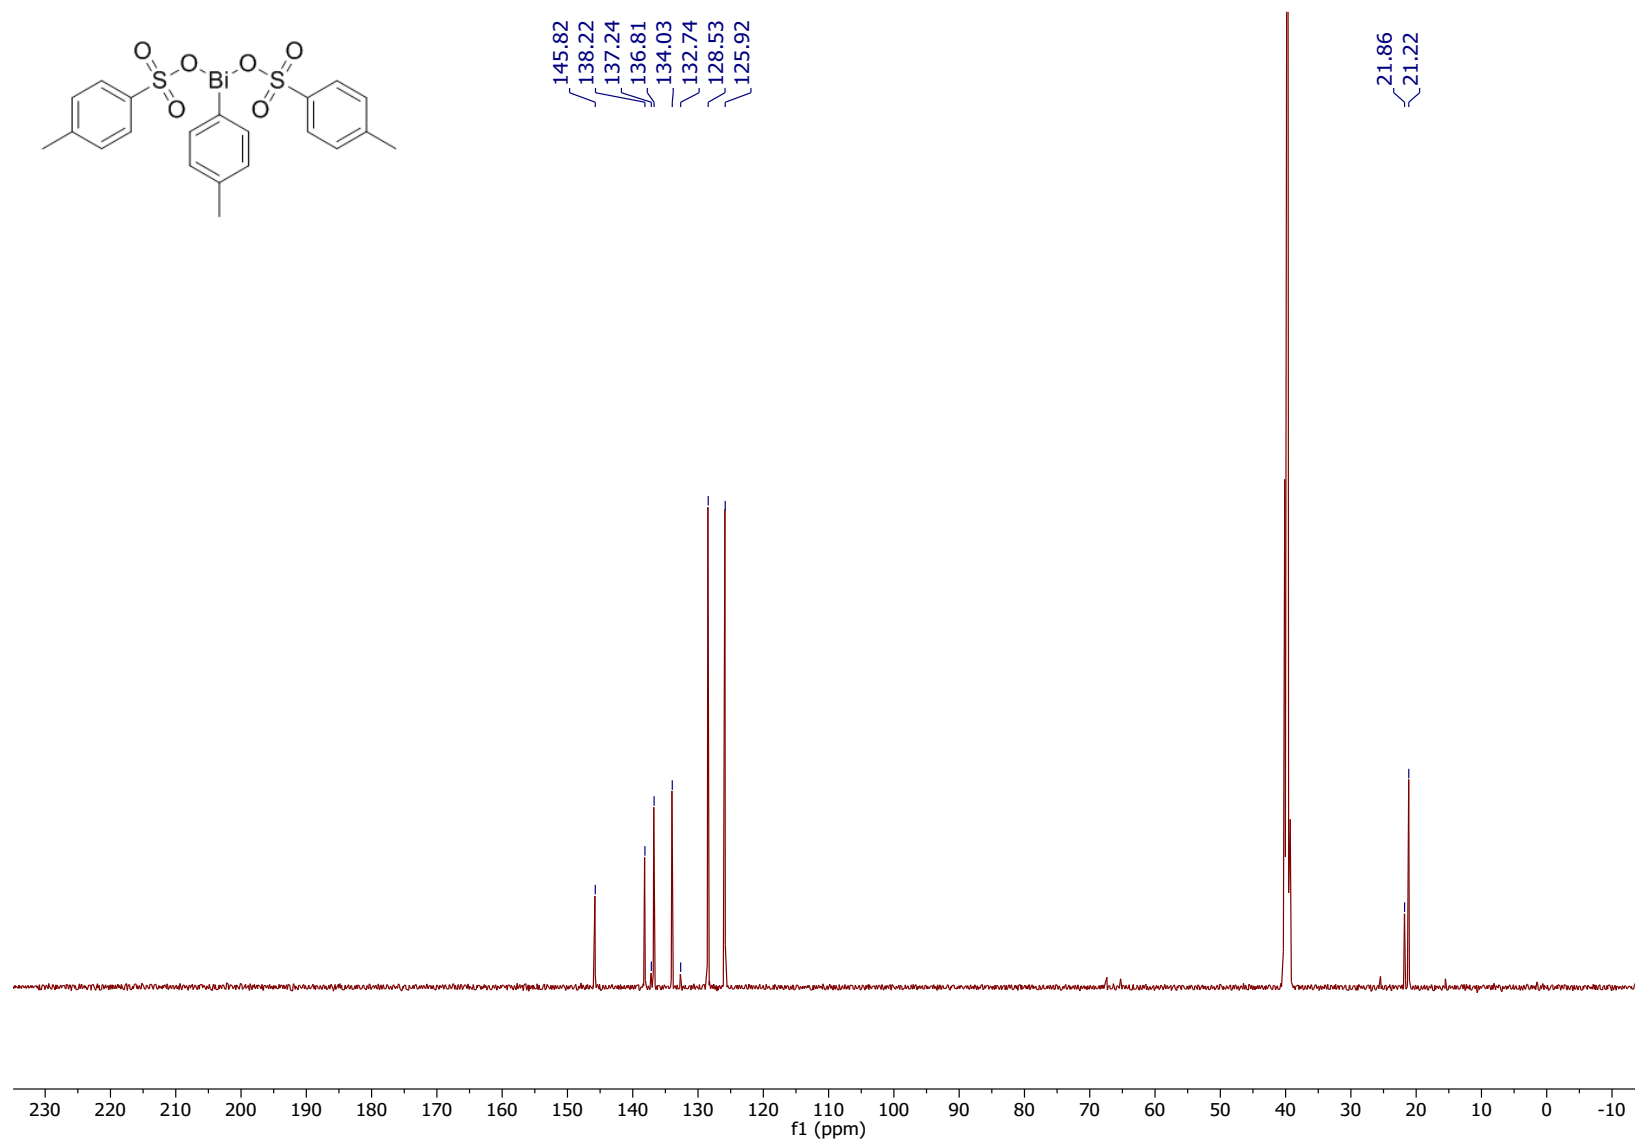

**Figure S3.**  $^{13}\text{C}$  { $^1\text{H}$ } NMR of **3b** in  $\text{d}_6$ -DMSO

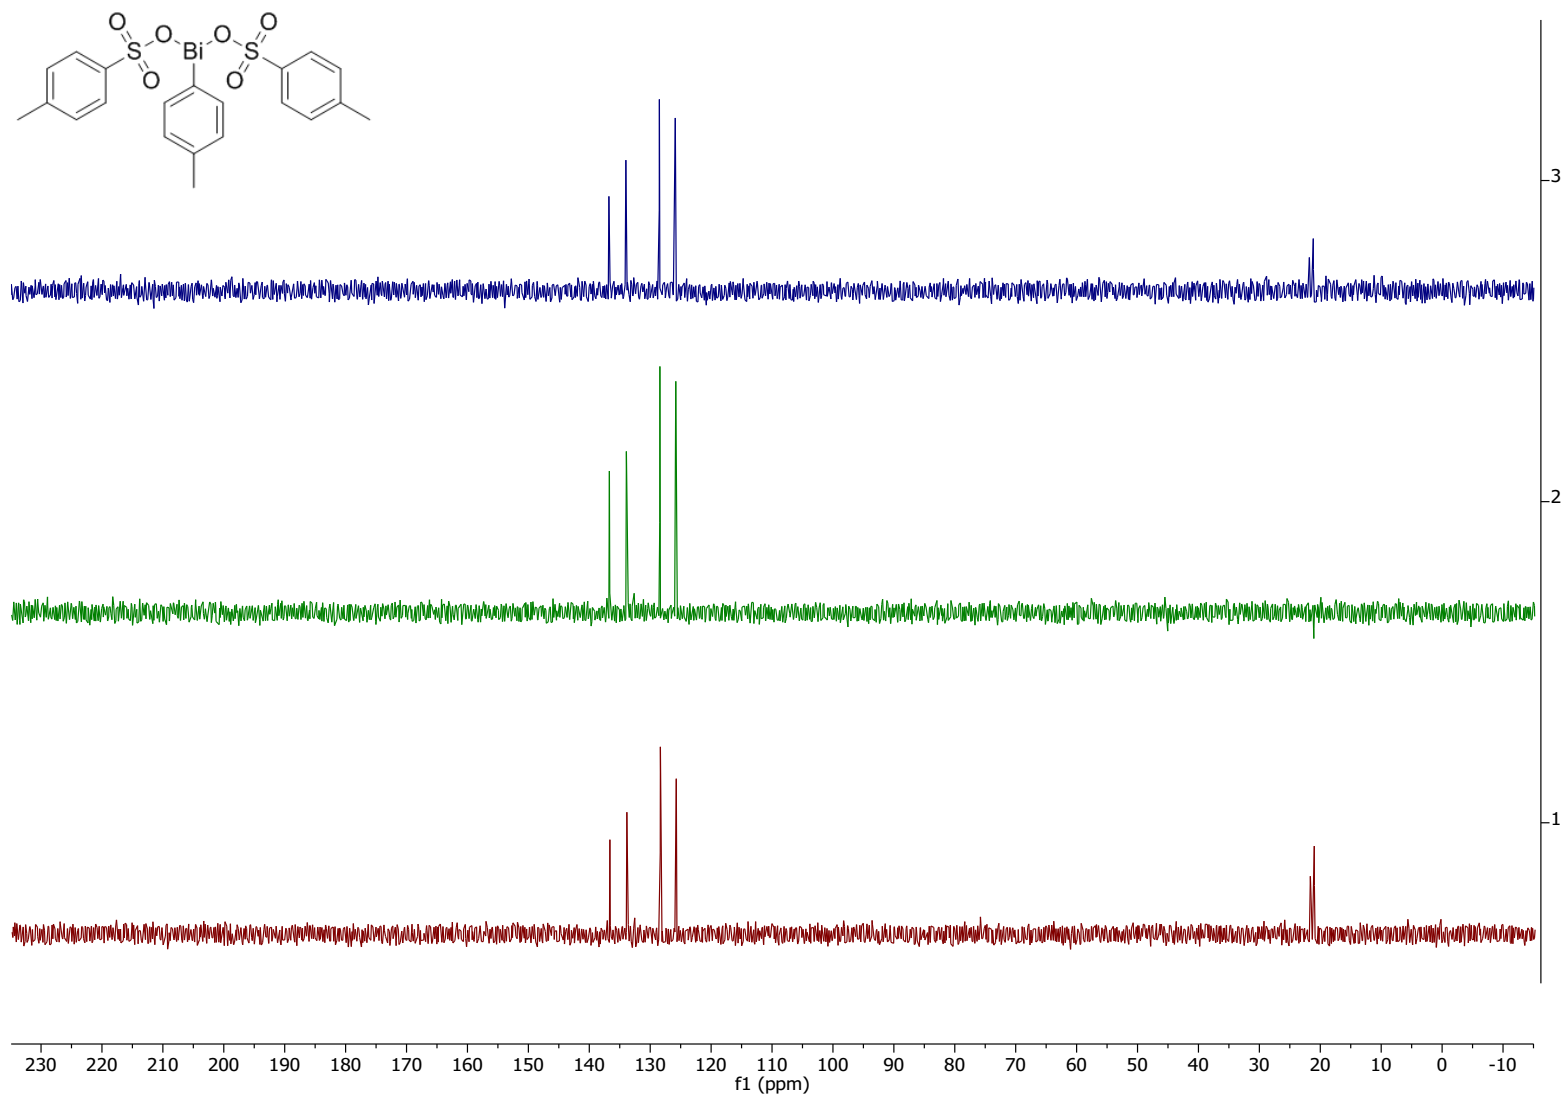

**Figure S4.**  $^{13}\text{C}$  NMR DEPT of **3b** in  $\text{d}_6\text{-DMSO}$



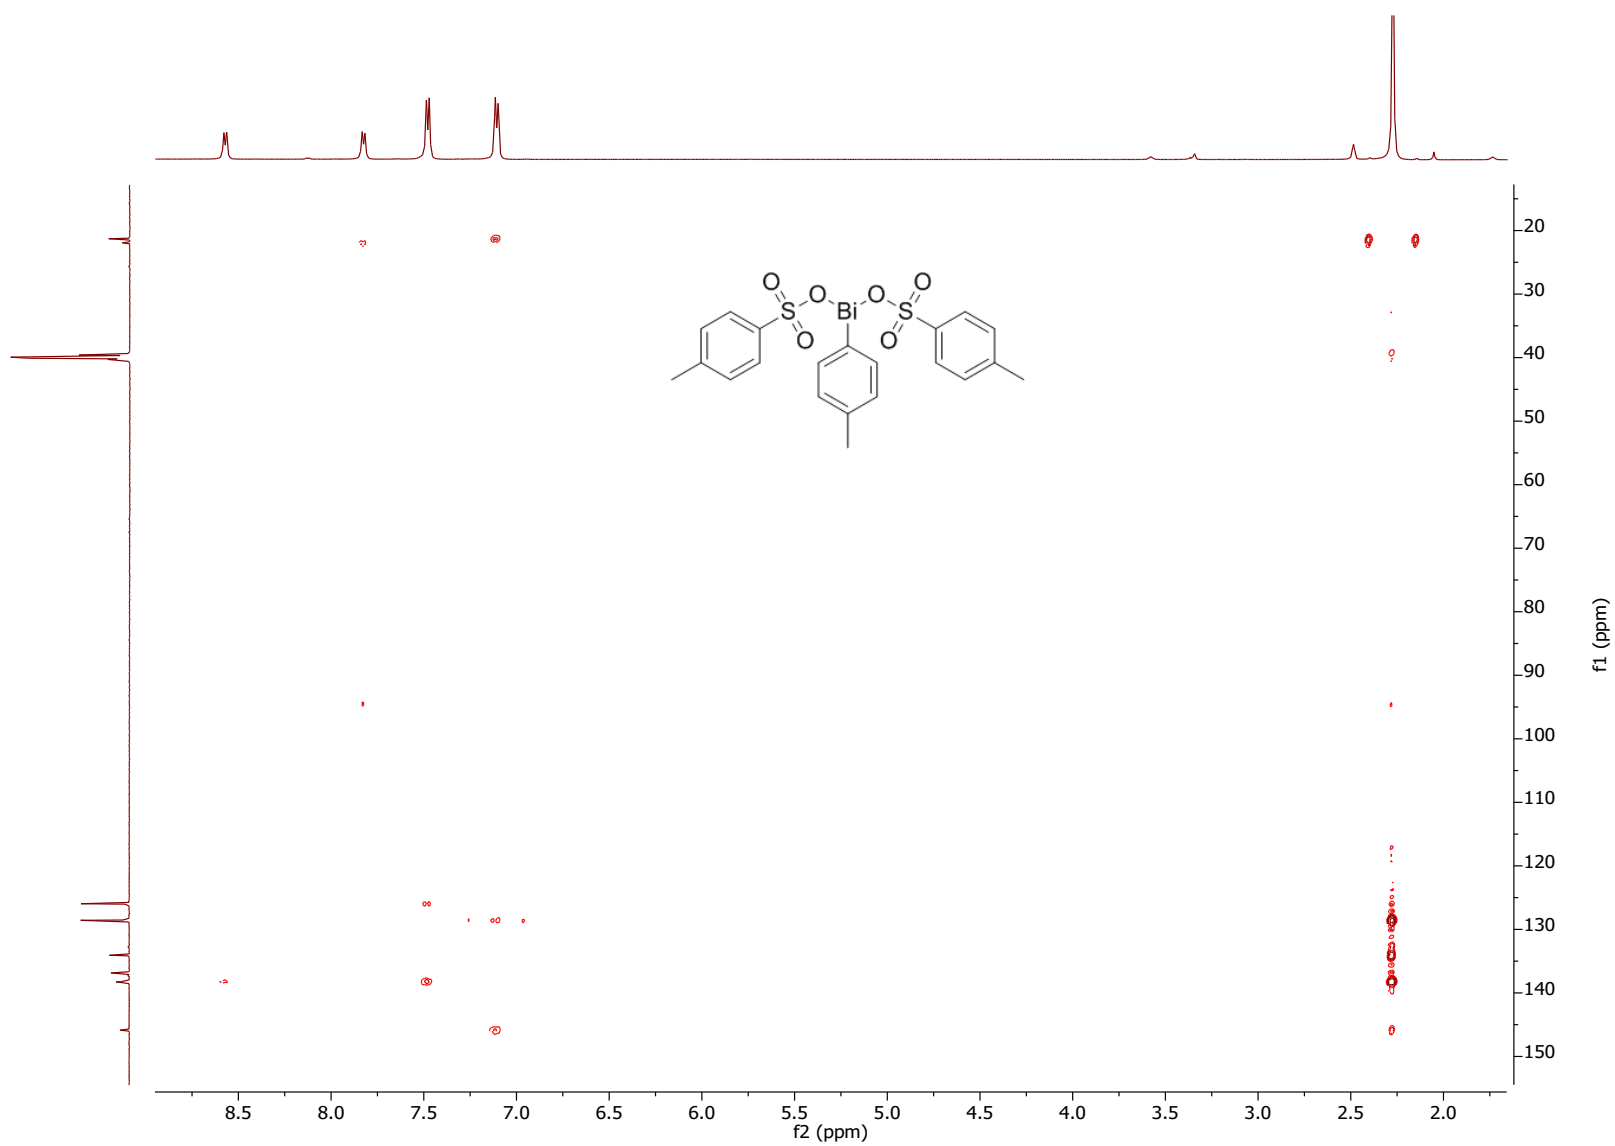

**Figure S5.** 2D HSQC of **3b** in  $\text{d}_6$ -DMSO

## 7. EA Report and NMR Spectra for Compounds 1

### NMR Spectra and EA Report of Compound 1a

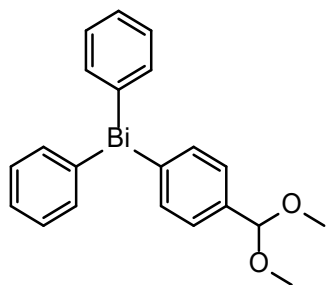

Chemical Formula:  $\text{BiO}_2\text{C}_{21}\text{H}_{21}$

Molecular Weight: 514.38

Elemental Analysis: C: 49.04; Bi: 40.63; H: 4.12; O: 6.22

CENTC Elemental Analysis Facility  
University of Rochester  
Rochester, NY 14627 USA  
Email: ealab@chem.rochester.edu

|                |                       |         |               |
|----------------|-----------------------|---------|---------------|
| Date of report | 5/10/2019 2:28:53PM   |         |               |
| User ID        | Administrator         |         |               |
| Comments       | TLG_1_65 [HvM]        |         |               |
| DATE & TIME    | 5/10/2019 12:20:59 PM | P_ID    | EA LAB        |
| SAMPLE ID      | 19284                 | USER ID | Administrator |
| WEIGHT (mg)    | 2.283                 | MODE    | CHN           |
|                | CARBON                | 48.763% |               |
|                | HYDROGEN              | 3.960%  |               |
|                | NITROGEN              | -.096%  |               |

#### Acknowledgment

Analytical data were obtained from the CENTC Elemental Analysis Facility at the University of Rochester, funded by NSF CHE-0650456.

#### Instrumentation

Microanalysis samples were weighed with a PerkinElmer Model AD6000 Autobalance and their compositions were determined with a PerkinElmer 2400 Series II Analyzer.

Figure S6. EA Report of 1a

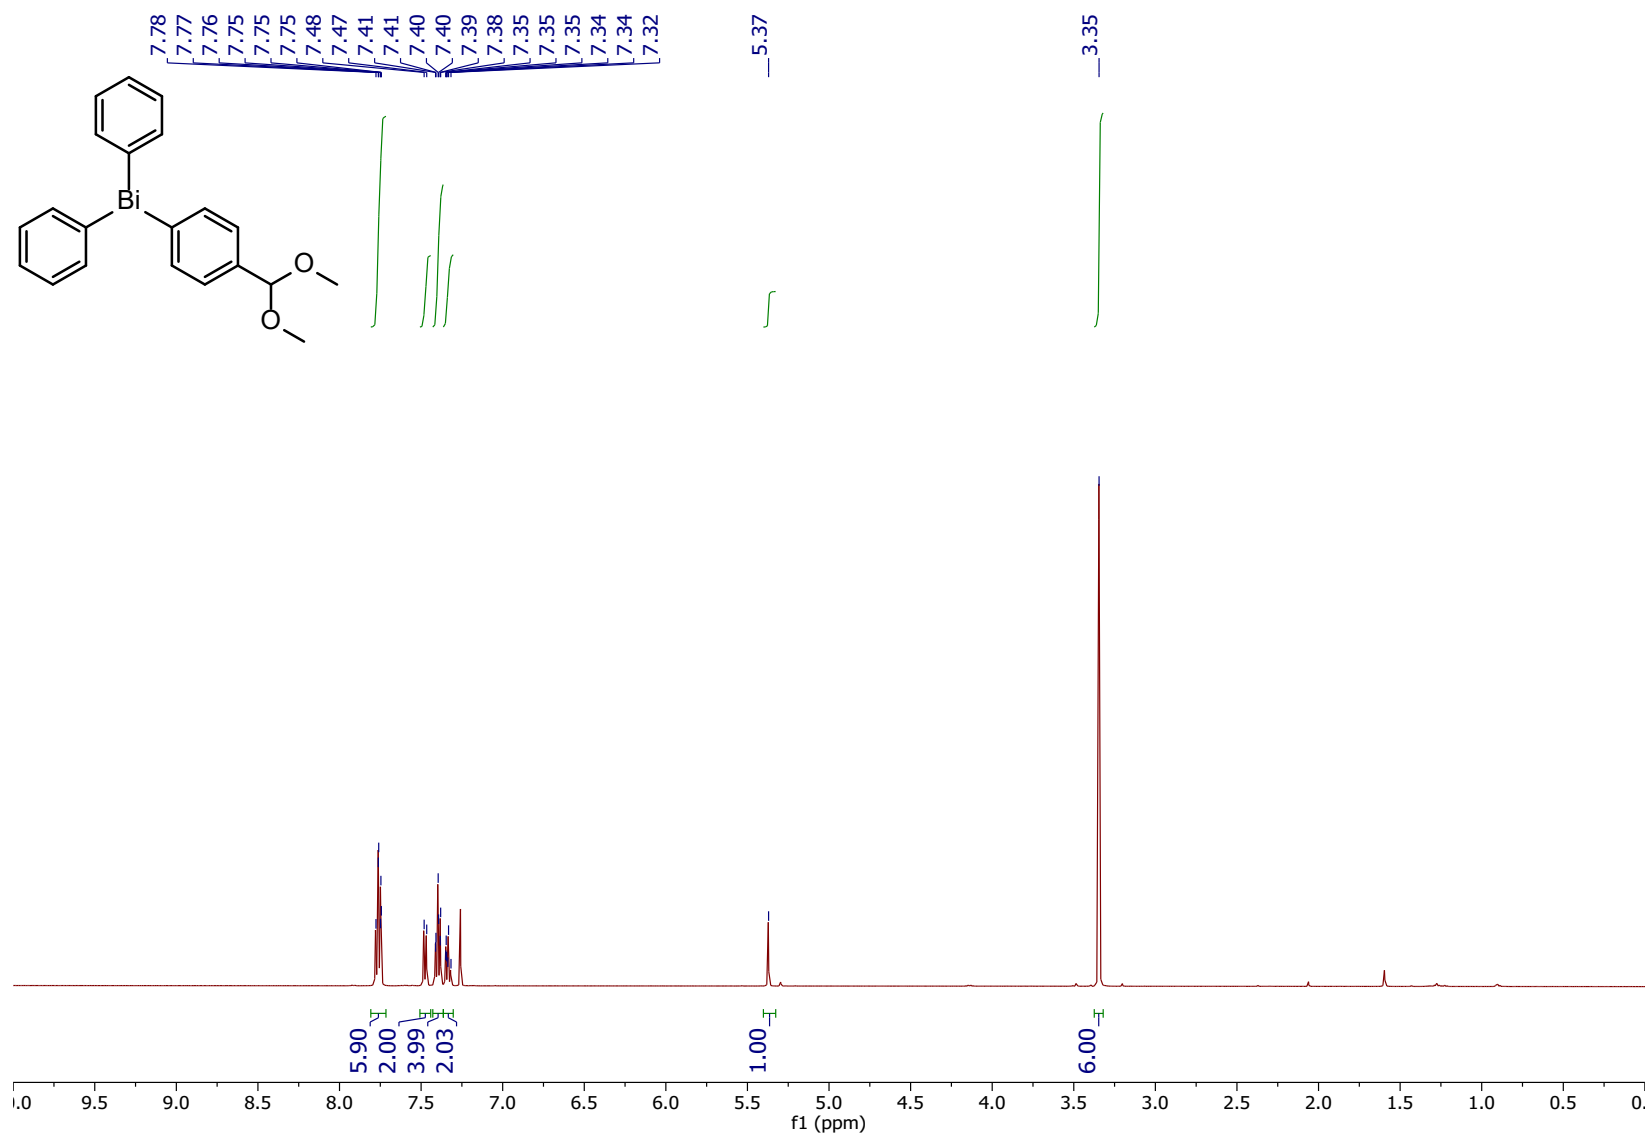

Figure S7. <sup>1</sup>H NMR of **1a** in CDCl<sub>3</sub>

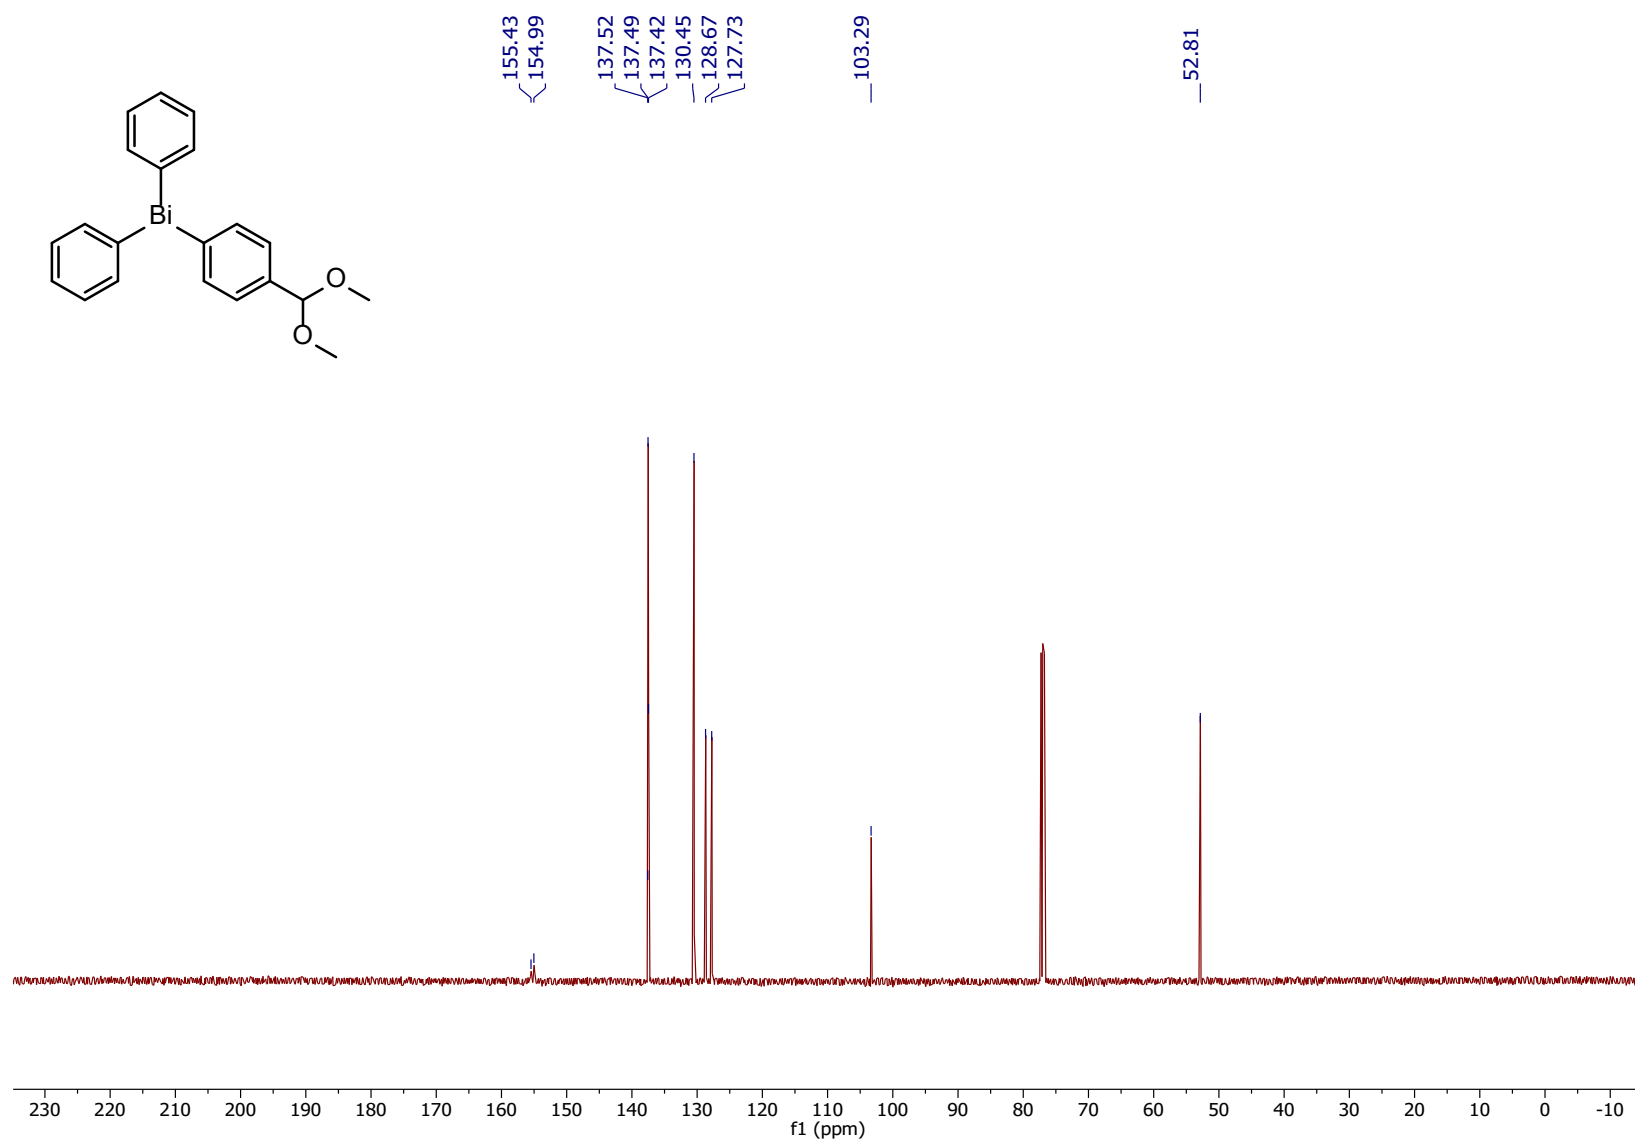

Figure S8.  $^{13}\text{C}$   $\{^1\text{H}\}$  NMR of **1a** in  $\text{CDCl}_3$

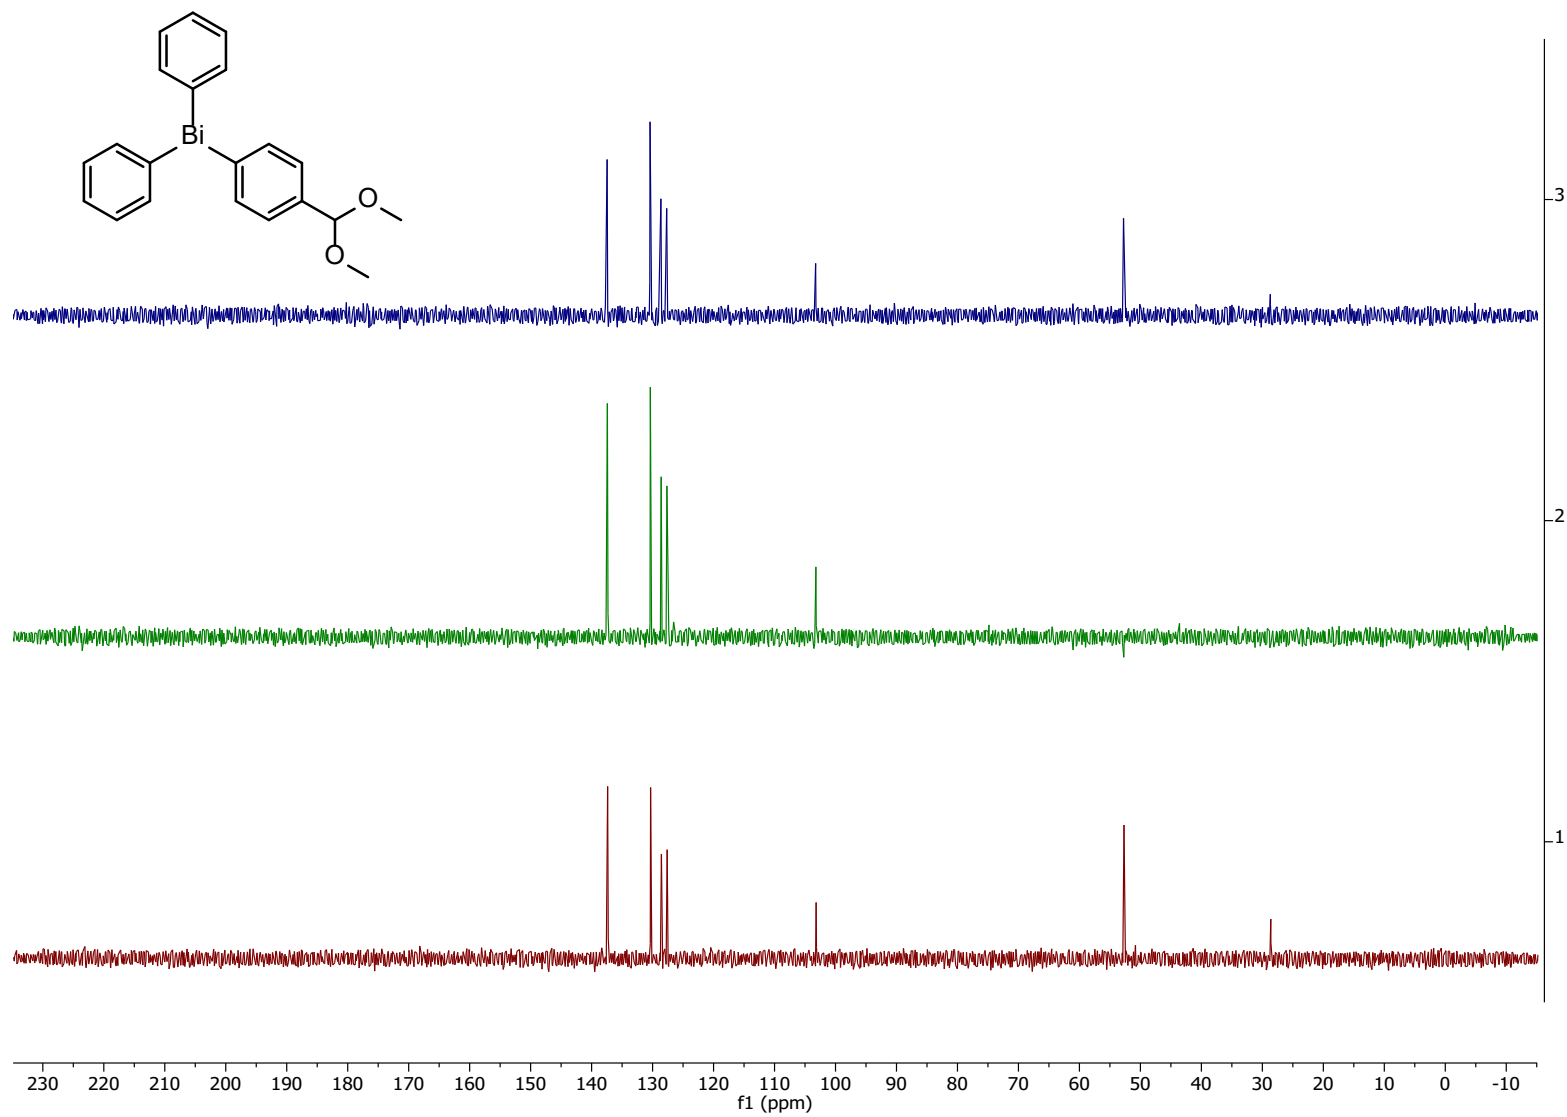

Figure S9.  $^{13}\text{C}$  DEPT of **1a** in  $\text{CDCl}_3$

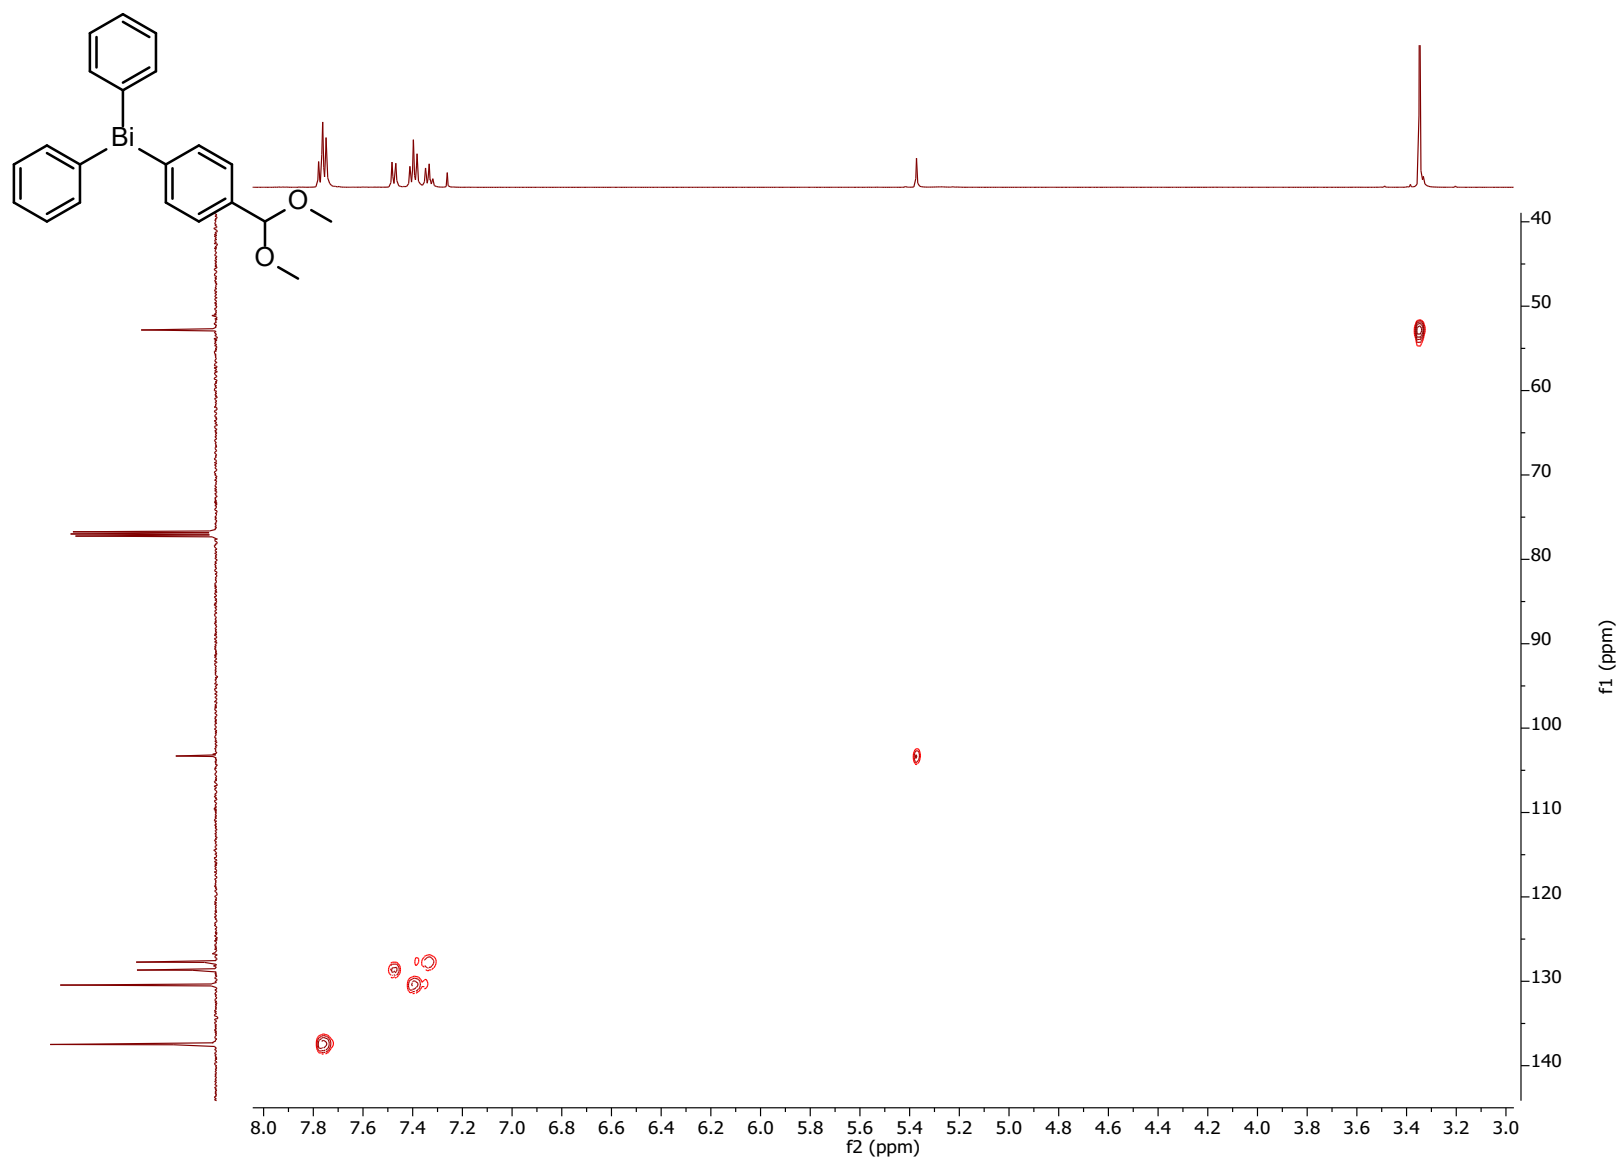

**Figure S10.** 2D HSQC of **1a** in  $\text{CDCl}_3$

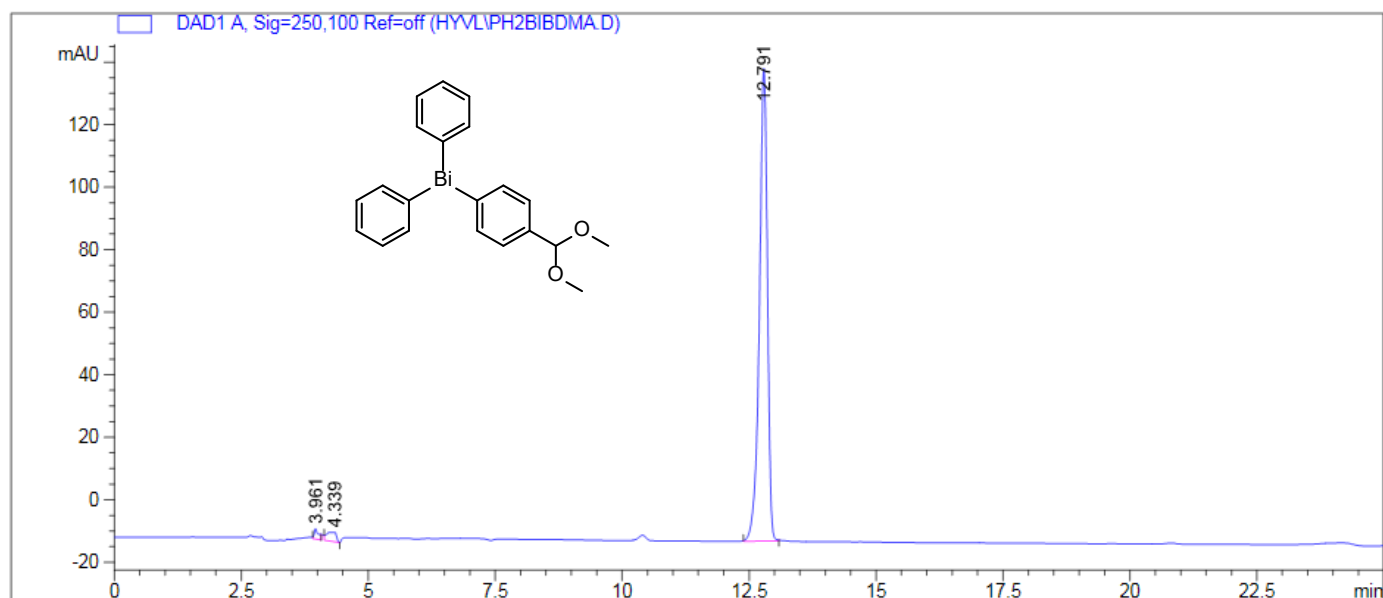

=====  
Area Percent Report  
=====

Sorted By : Signal  
Multiplier: : 1.0000  
Dilution: : 1.0000  
Sample Amount: : 20.00000 [ng/ul] (not used in calc.)  
Use Multiplier & Dilution Factor with ISTDs

Signal 1: DAD1 A, Sig=250,100 Ref=off

| Peak # | RetTime [min] | Type | Width [min] | Area [mAU*s] | Height [mAU] | Area %  |
|--------|---------------|------|-------------|--------------|--------------|---------|
| 1      | 3.961         | BB   | 0.0811      | 19.33534     | 3.26655      | 1.1250  |
| 2      | 4.339         | BV   | 0.1627      | 38.95380     | 3.05713      | 2.2664  |
| 3      | 12.791        | BB   | 0.1660      | 1660.45557   | 151.28766    | 96.6086 |

**Figure S11.** HPLC Chromatogram of **1a**

## NMR Spectra and EA Report of Compound 1b

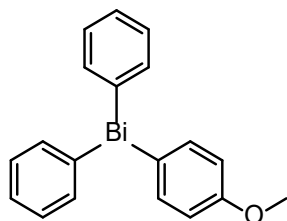

Chemical Formula: BiOC<sub>19</sub>H<sub>17</sub>

Molecular Weight: 490.36

Elemental Analysis: C: 48.52; Bi: 44.43; H: 3.64; O: 3.40

CENTC Elemental Analysis Facility  
University of Rochester  
Rochester, NY 14627 USA  
Email: ealab@chem.rochester.edu

|                |                      |         |               |
|----------------|----------------------|---------|---------------|
| Date of report | 5/10/2019 2:34:38PM  |         |               |
| User ID        | Administrator        |         |               |
| Comments       | TLG_1_146 [HyM]      |         |               |
| DATE & TIME    | 5/10/2019 1:54:48 PM | P_ID    | EA LAB        |
| SAMPLE ID      | 19295                | USER ID | Administrator |
| WEIGHT (mg)    | 2.538                | MODE    | CHN           |
|                |                      |         |               |
| CARBON         |                      | 48.645% |               |
| HYDROGEN       |                      | 3.680%  |               |
| NITROGEN       |                      | -.012%  |               |

### Special Handling

The sample was combusted in a tin capsule that was crimp-sealed with a die apparatus.

### Acknowledgment

Analytical data were obtained from the CENTC Elemental Analysis Facility at the University of Rochester, funded by NSF CHE-0650456.

**Figure S12.** EA report for **1b**



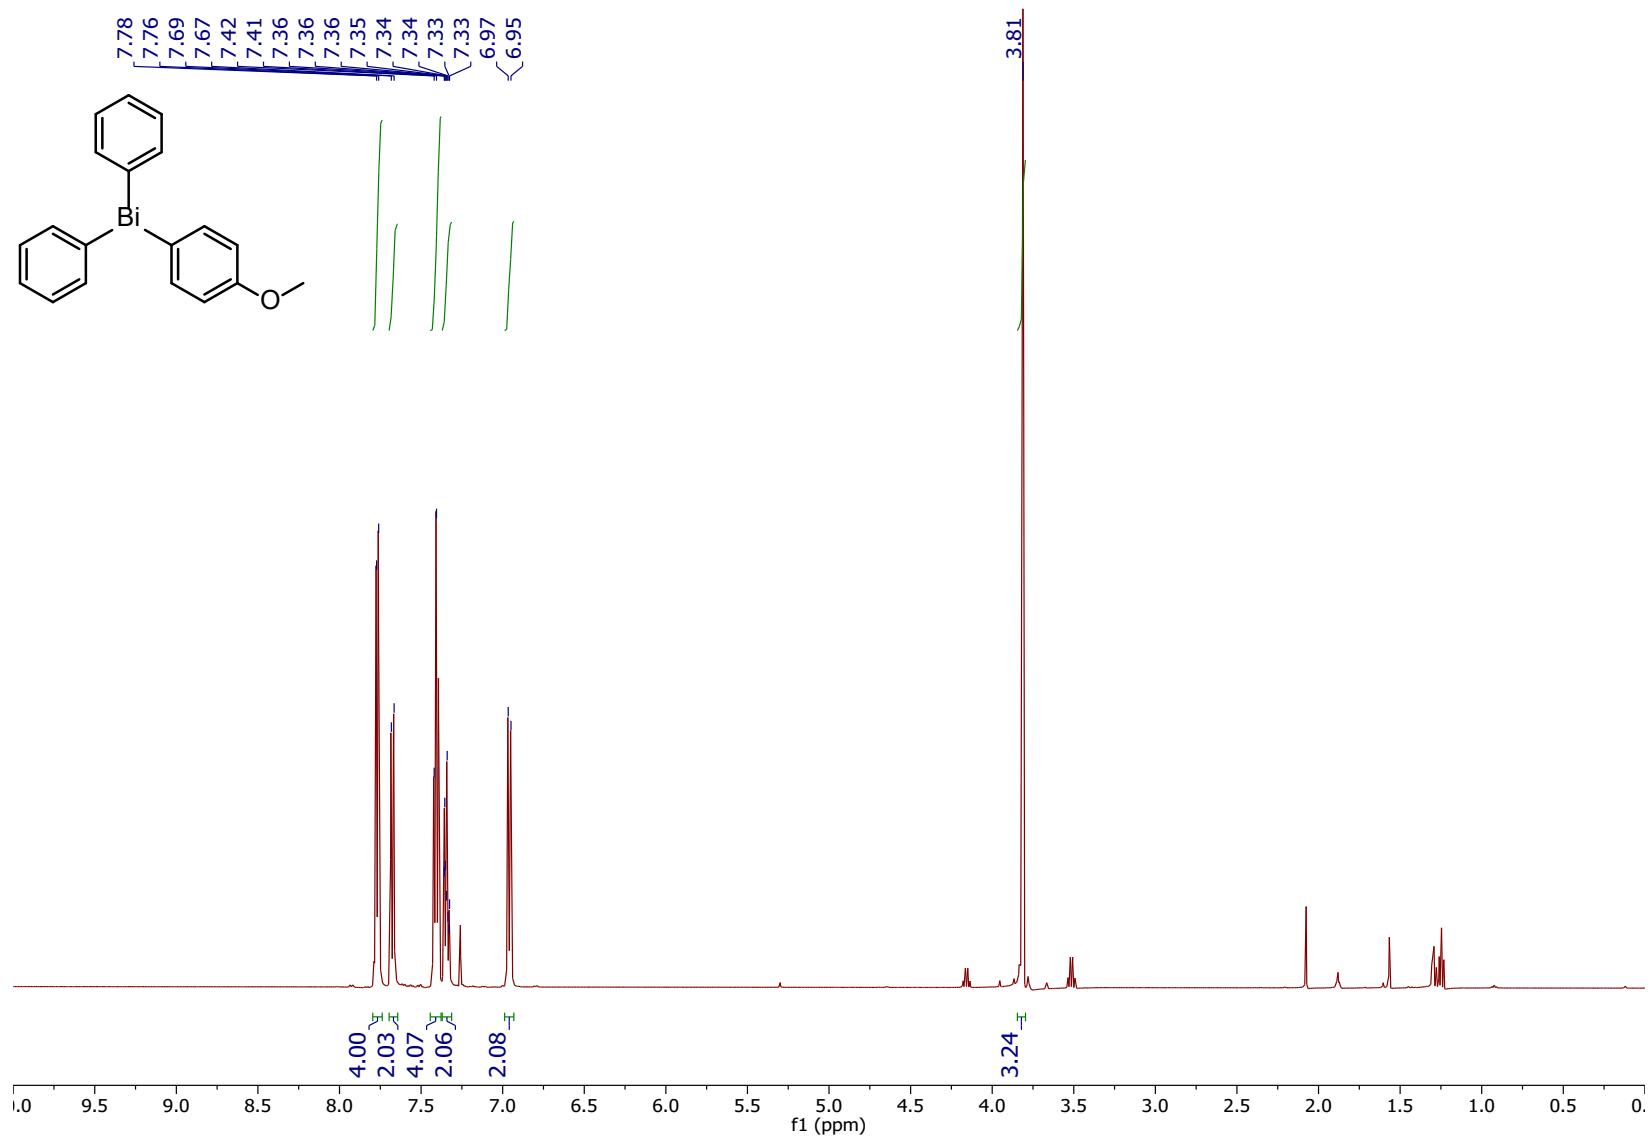

Figure S13. <sup>1</sup>H NMR of **1b** in CDCl<sub>3</sub>

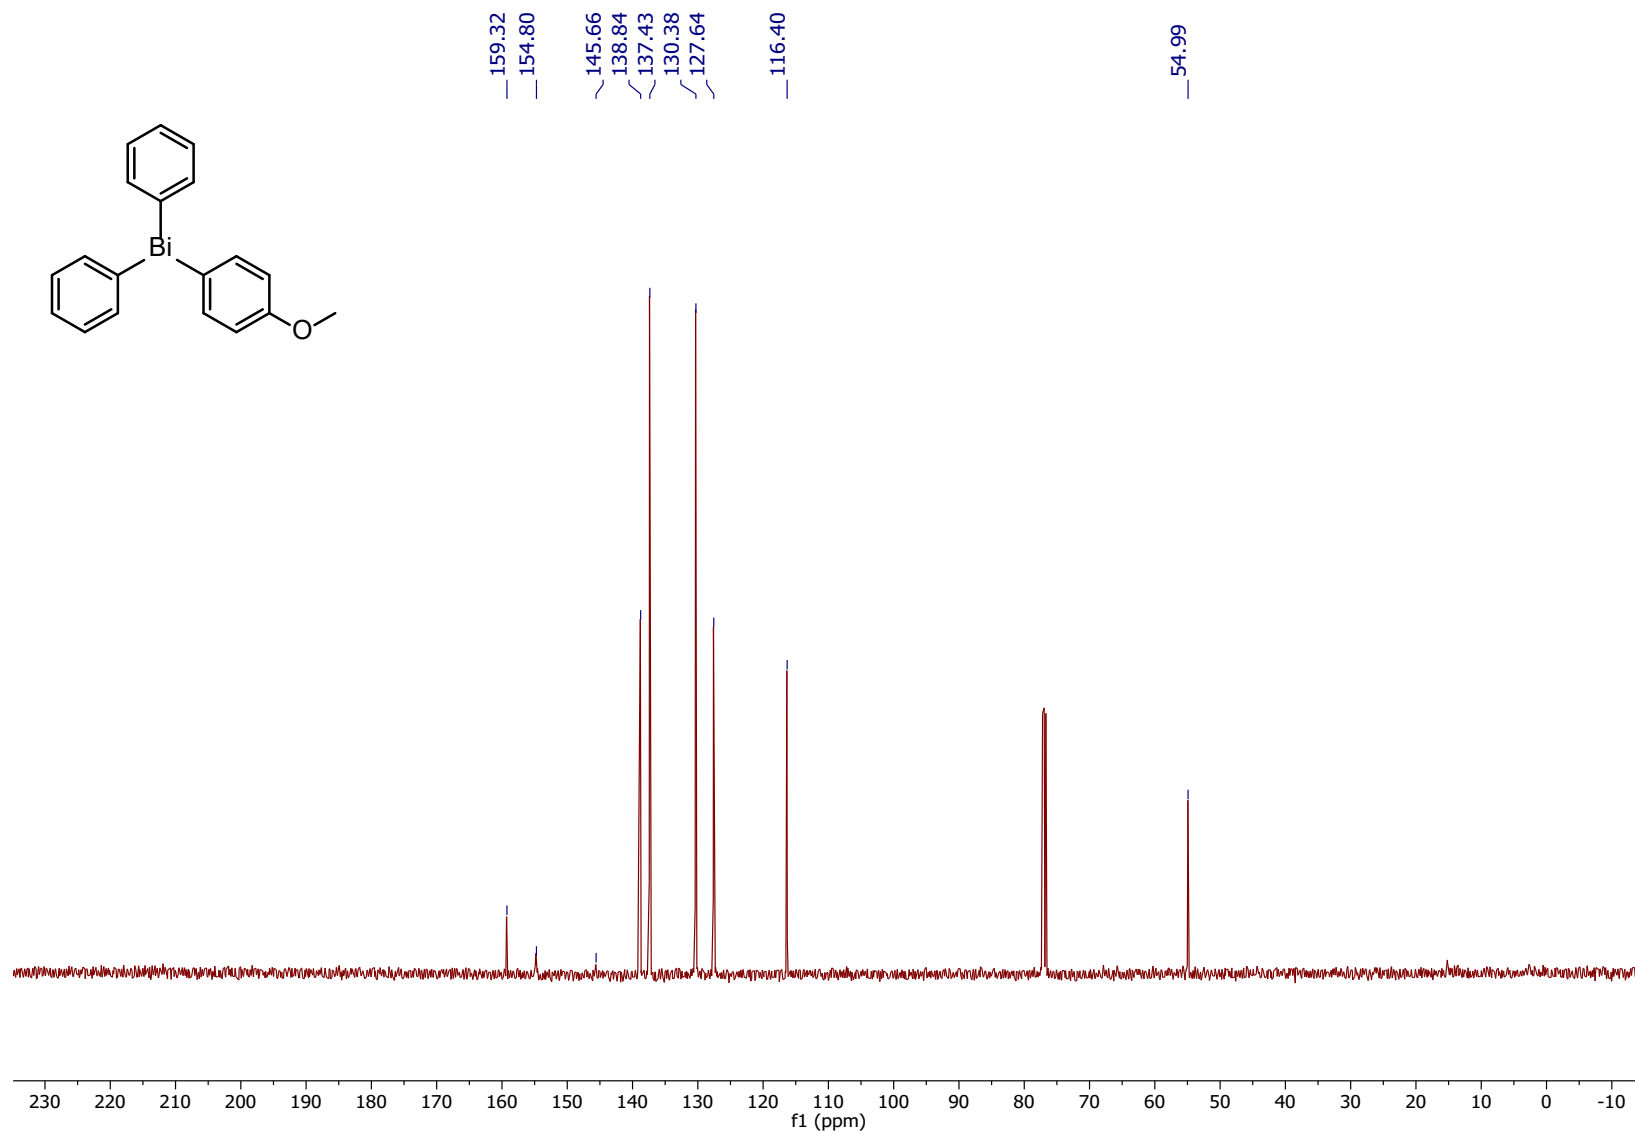

Figure S14.  $^{13}\text{C}$  { $^1\text{H}$ } NMR of **1b** in CDCl<sub>3</sub>

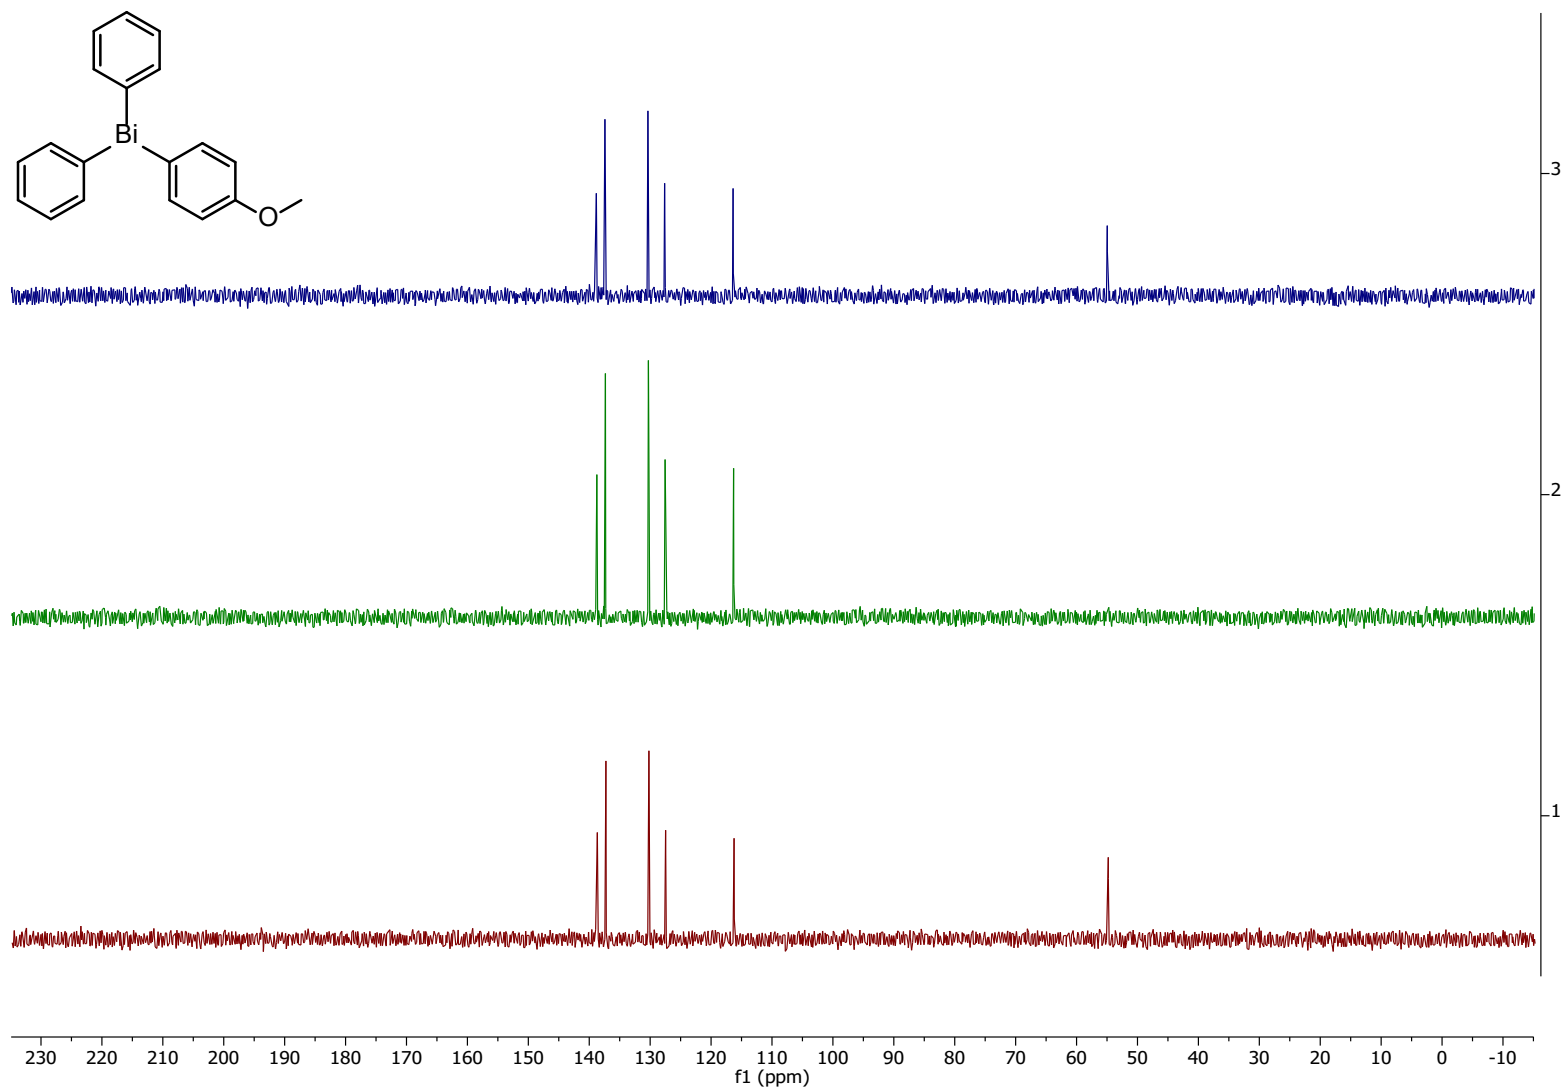

Figure S15.  $^{13}\text{C}$  DEPT of 1b in  $\text{CDCl}_3$



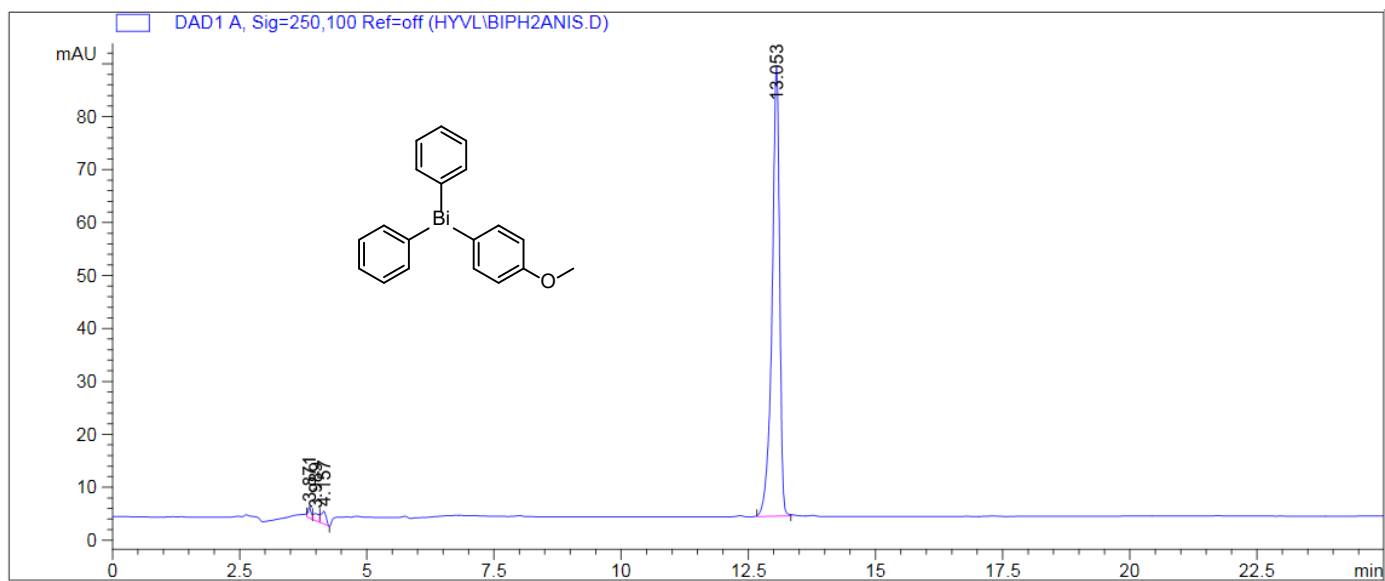

Area Percent Report

Sorted By : Signal  
Multiplier: : 1.0000  
Dilution: : 1.0000  
Sample Amount: : 20.00000 [ng/ul] (not used in calc.)  
Use Multiplier & Dilution Factor with ISTDs

Signal 1: DAD1 A, Sig=250,100 Ref=off

| Peak # | RetTime [min] | Type | Width [min] | Area [mAU*s] | Height [mAU] | Area %  |
|--------|---------------|------|-------------|--------------|--------------|---------|
| 1      | 3.871         | BV   | 0.0615      | 8.75000      | 2.06416      | 0.9597  |
| 2      | 3.989         | VV   | 0.1130      | 11.17959     | 1.31753      | 1.2261  |
| 3      | 4.157         | VV   | 0.1015      | 15.79875     | 2.37831      | 1.7327  |
| 4      | 13.053        | BB   | 0.1543      | 876.05383    | 84.94643     | 96.0815 |

Figure S17. HPLC Chromatogram of **1b**

## NMR Spectra and EA Report of Compound 1c

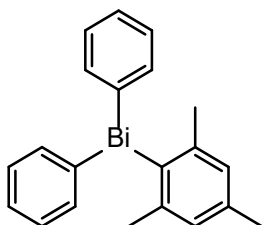

Chemical Formula:  $\text{BiC}_{21}\text{H}_{21}$

Molecular Weight: 482.38

Elemental Analysis: C: 52.29; Bi: 43.32; H: 4.39

CENTC Elemental Analysis Facility  
University of Rochester  
Rochester, NY 14627 USA  
Email: ealab@chem.rochester.edu

|                |                     |
|----------------|---------------------|
| Date of report | 5/10/2019 2:29:39PM |
| User ID        | Administrator       |
| Comments       | TLG_1_155 [Hv]      |

|             |                       |         |               |
|-------------|-----------------------|---------|---------------|
| DATE & TIME | 5/10/2019 11:35:29 AM | P_ID    | EA LAB        |
| SAMPLE ID   | 19286                 | USER ID | Administrator |
| WEIGHT (mg) | 2.213                 | MODE    | CHN           |

|          |         |
|----------|---------|
| CARBON   | 52.194% |
| HYDROGEN | 4.291%  |
| NITROGEN | -.057%  |

### Acknowledgment

Analytical data were obtained from the CENTC Elemental Analysis Facility at the University of Rochester, funded by NSF CHE-0650456.

### Instrumentation

Microanalysis samples were weighed with a PerkinElmer Model AD6000 Autobalance and their compositions were determined with a PerkinElmer 2400 Series II Analyzer.

**Figure S18.** EA report for 1c

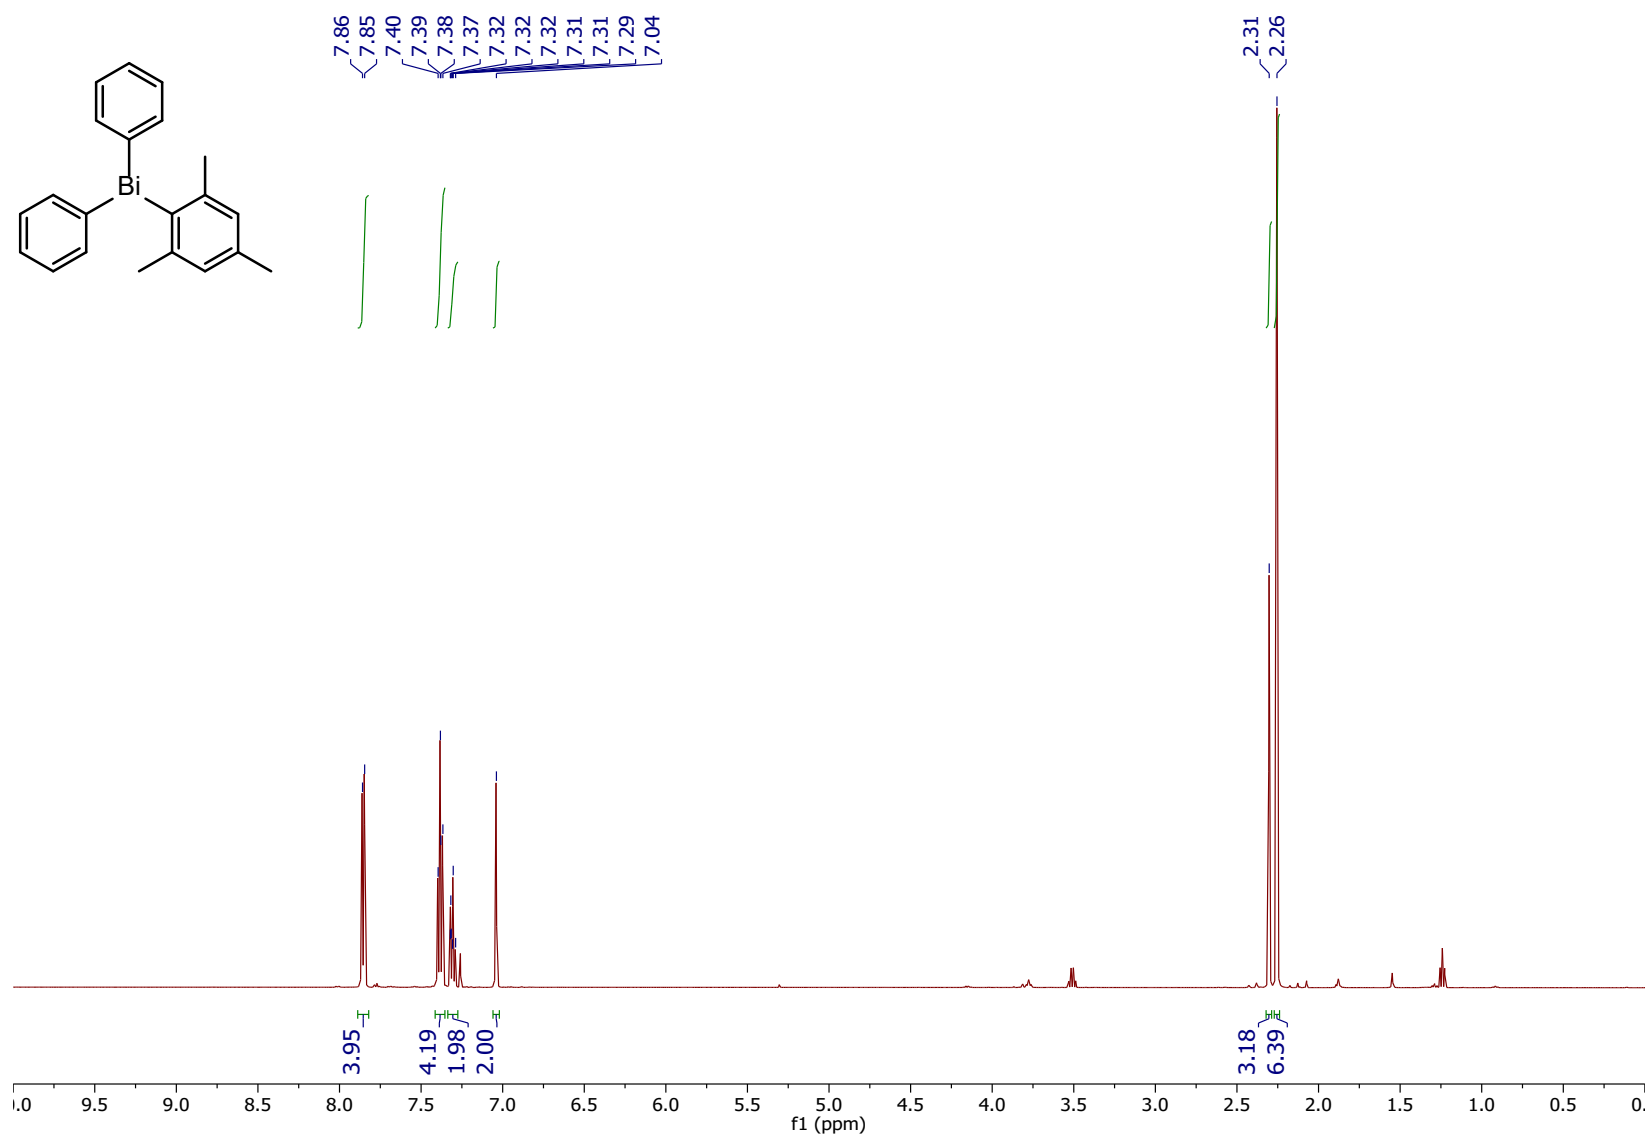

Figure S19.  $^1\text{H}$  NMR of **1c** CDCl<sub>3</sub>

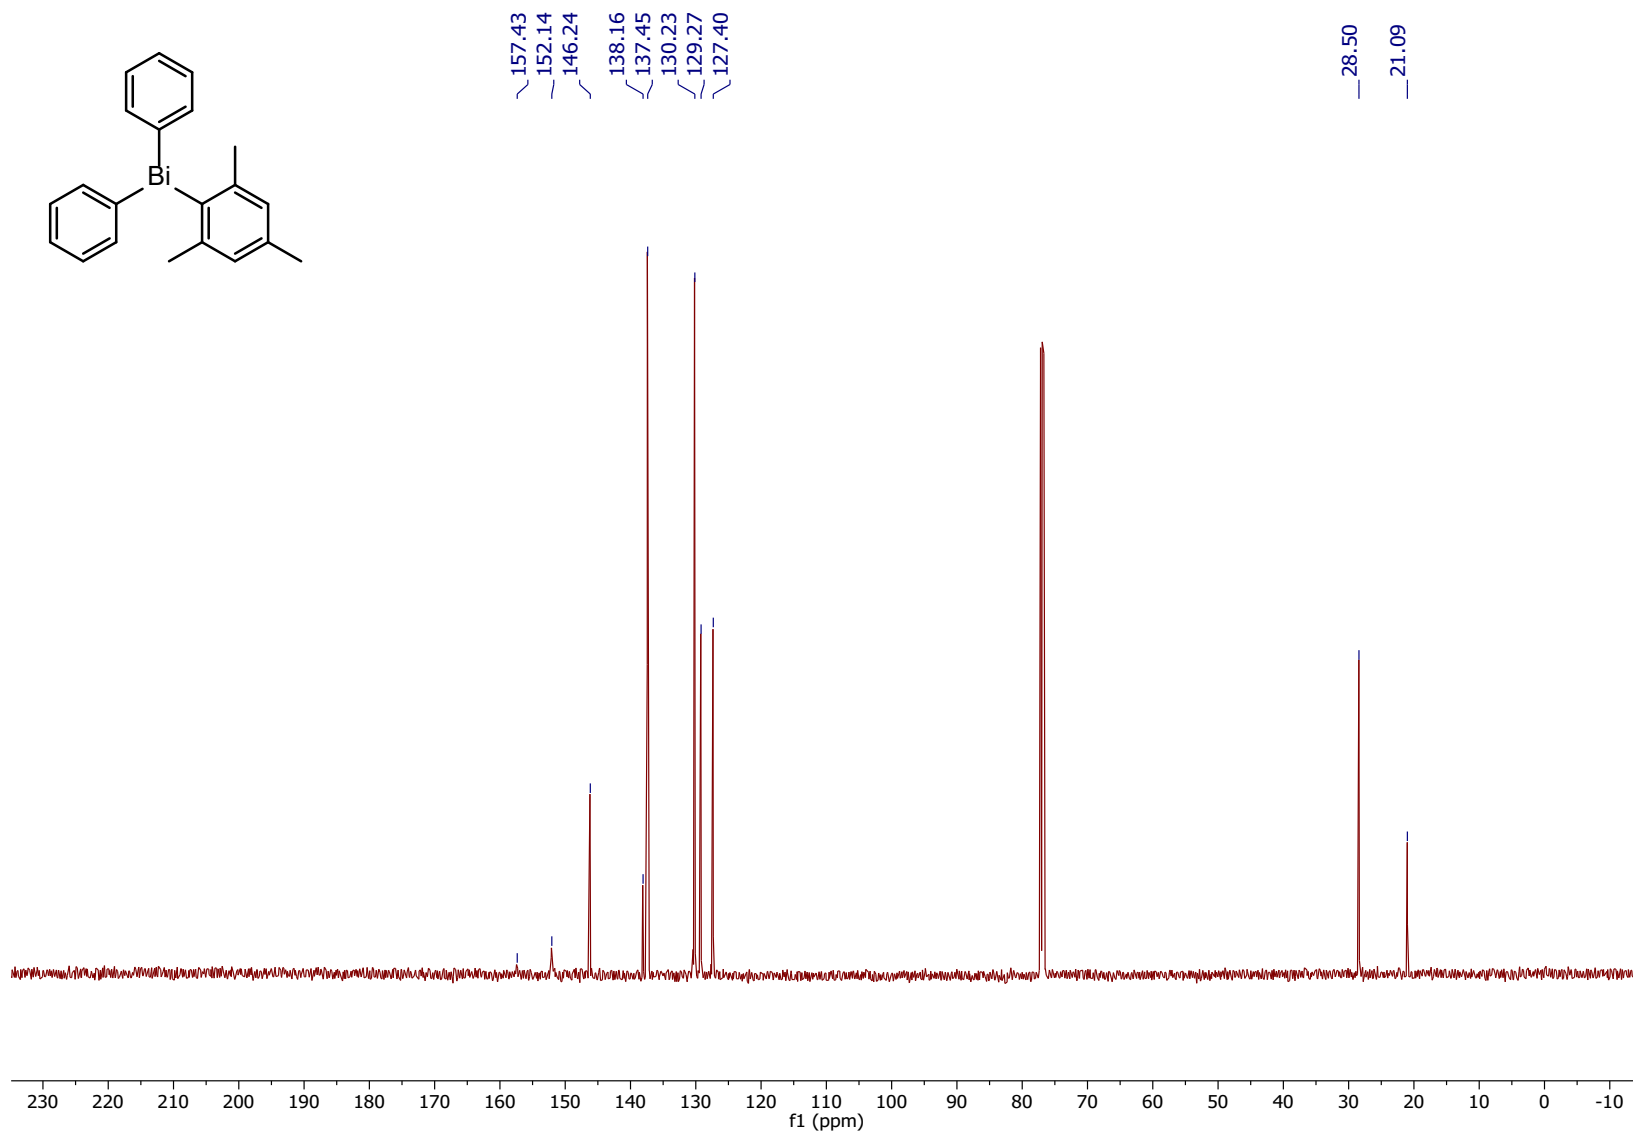

Figure S20.  $^{13}\text{C}$   $\{^1\text{H}\}$  NMR of **1c** in  $\text{CDCl}_3$



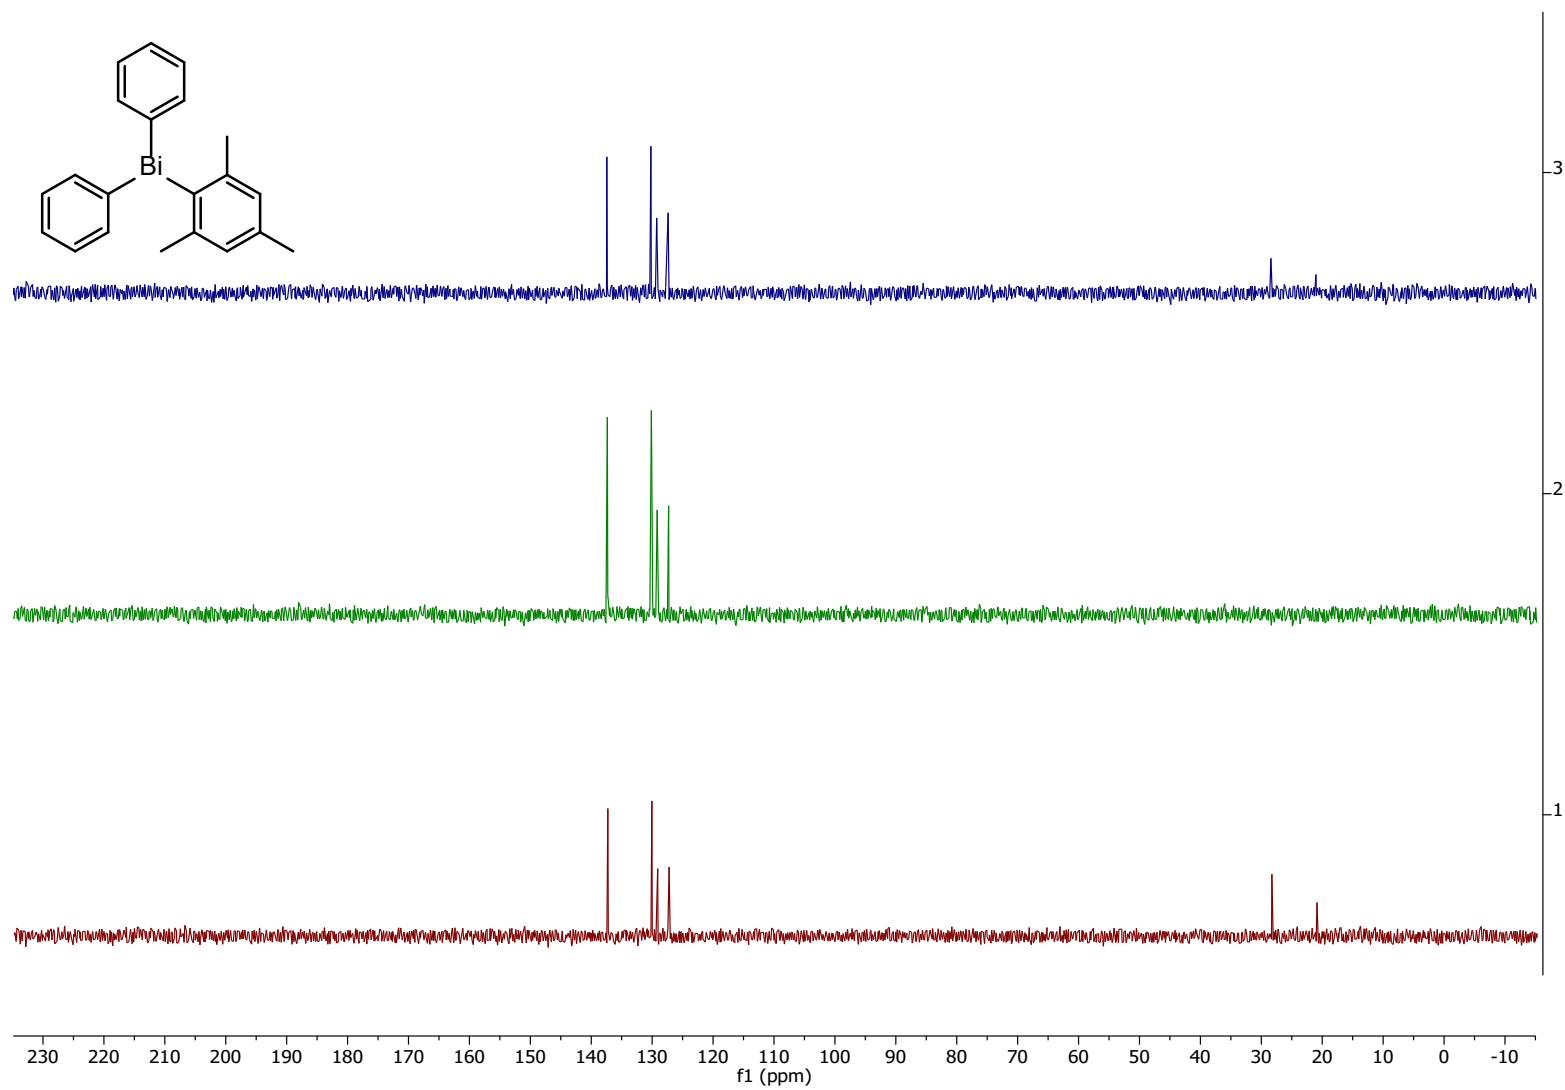

Figure S21.  $^{13}\text{C}$  DEPT of 1c in  $\text{CDCl}_3$

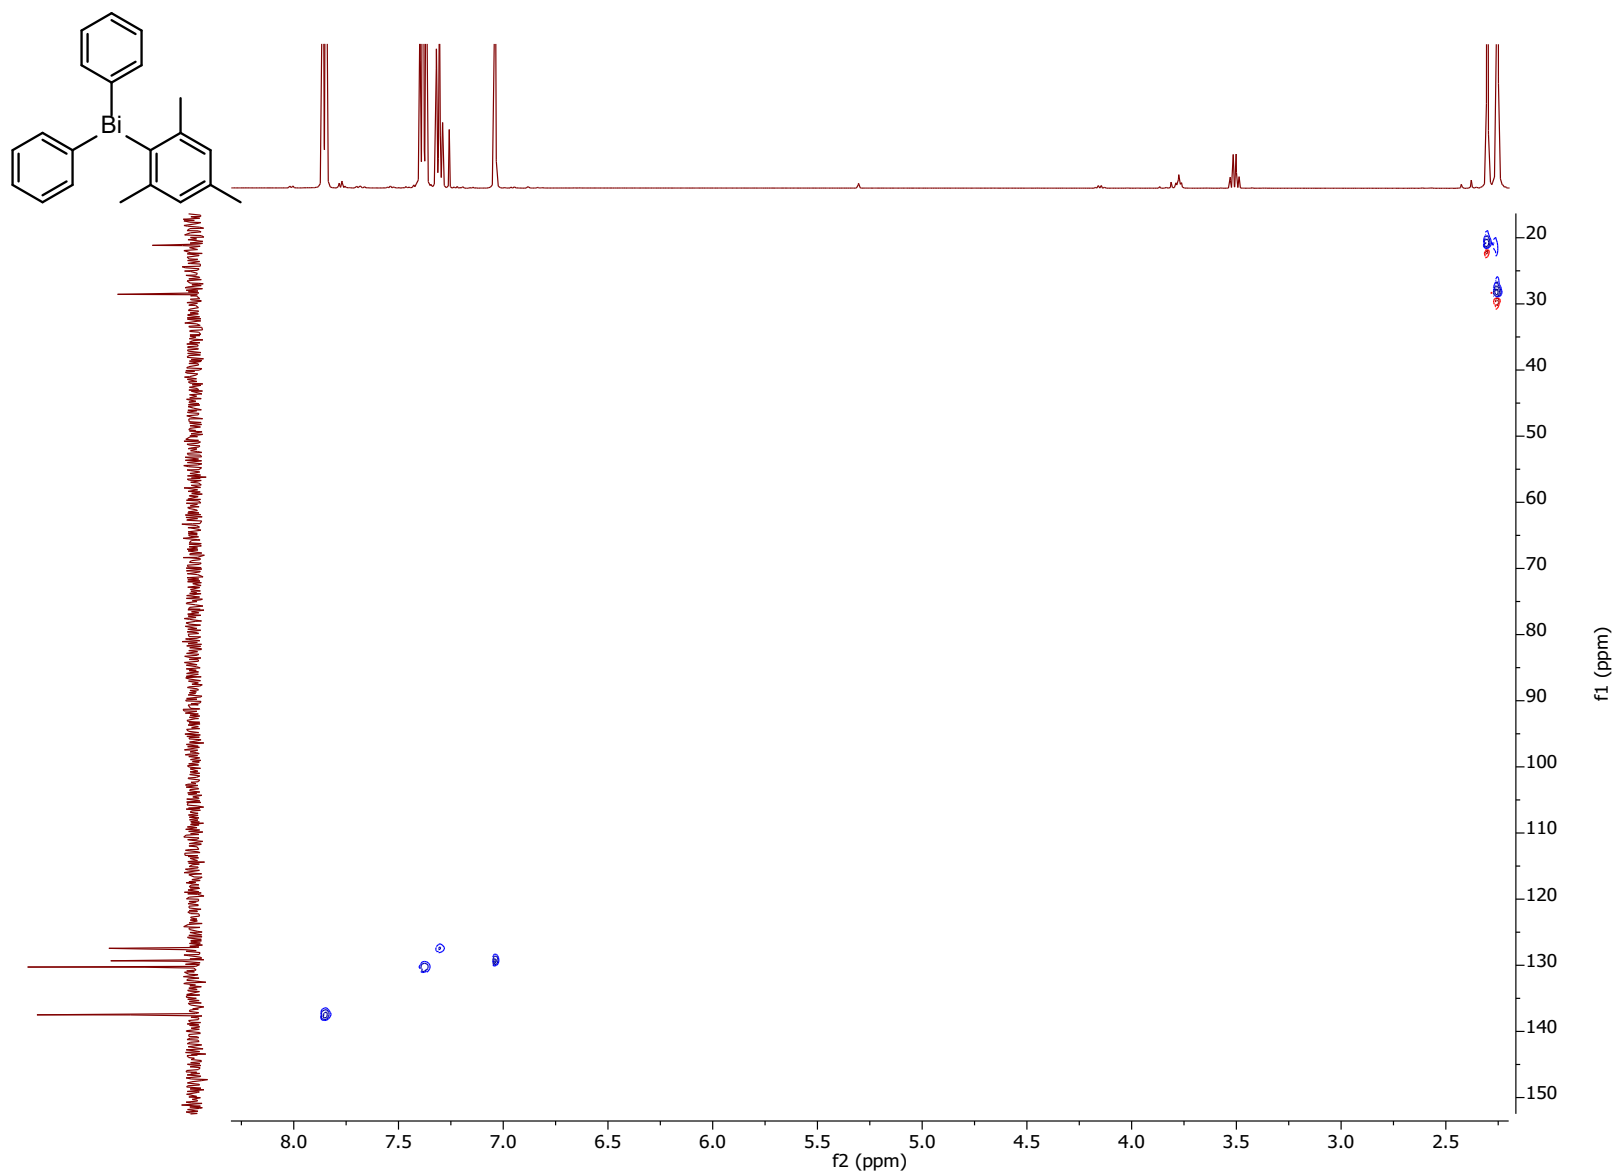

Figure S22. 2D HSQC of **1c** in  $\text{CDCl}_3$

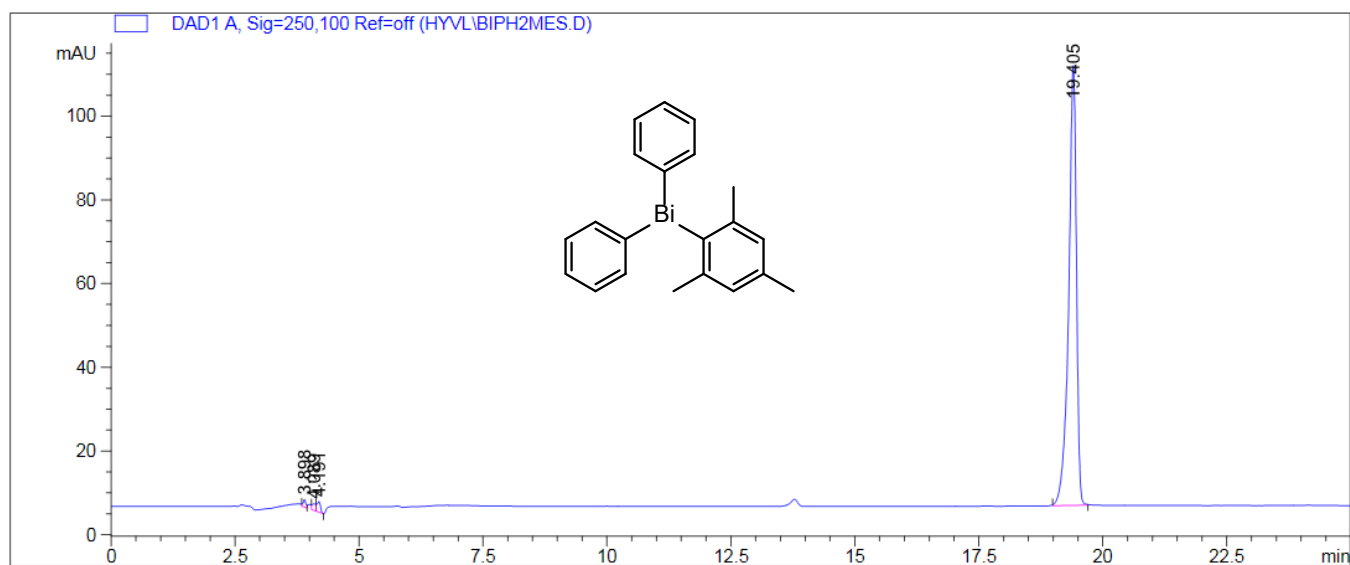

Area Percent Report

Sorted By : Signal  
Multiplier: : 1.0000  
Dilution: : 1.0000  
Sample Amount: : 20.00000 [ng/ul] (not used in calc.)  
Use Multiplier & Dilution Factor with ISTDs

Signal 1: DAD1 A, Sig=250,100 Ref=off

| Peak # | RetTime [min] | Type | Width [min] | Area [mAU*s] | Height [mAU] | Area %  |
|--------|---------------|------|-------------|--------------|--------------|---------|
| 1      | 3.898         | BV   | 0.0569      | 6.90854      | 1.79331      | 0.5888  |
| 2      | 4.089         | VV   | 0.0740      | 8.17104      | 1.58943      | 0.6964  |
| 3      | 4.191         | VV   | 0.0726      | 12.11588     | 2.49681      | 1.0325  |
| 4      | 19.405        | BB   | 0.1612      | 1146.20776   | 105.09236    | 97.6823 |

Figure S23. HPLC Chromatogram of 1c

## NMR Spectra and EA Report of Compound 1d

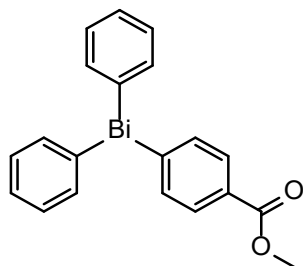

Chemical Formula:  $\text{BiO}_2\text{C}_{20}\text{H}_{17}$

Molecular Weight: 498.33

Elemental Analysis: C: 48.20; Bi: 41.94; H: 3.44; O: 6.42

CENTC Elemental Analysis Facility  
University of Rochester  
Rochester, NY 14627 USA  
Email: ealab@chem.rochester.edu

|                |                      |
|----------------|----------------------|
| Date of report | 10/25/2019 6:17:04PM |
| User ID        | Administrator        |
| Comments       | TLG_1_151_B [Hyvl]   |

|             |                       |         |               |
|-------------|-----------------------|---------|---------------|
| DATE & TIME | 10/25/2019 2:48:46 PM | P_ID    | EA LAB        |
| SAMPLE ID   | 19596                 | USER ID | Administrator |
| WEIGHT (mg) | 2.188                 | MODE    | CHN           |
|             |                       |         |               |
| CARBON      |                       | 48.597% |               |
| HYDROGEN    |                       | 3.260%  |               |
| NITROGEN    |                       | 0.0%    |               |

### Acknowledgment

Analytical data were obtained from the CENTC Elemental Analysis Facility at the University of Rochester, funded by NSF CHE-0650456.

**Figure S24.** EA report for **1d**

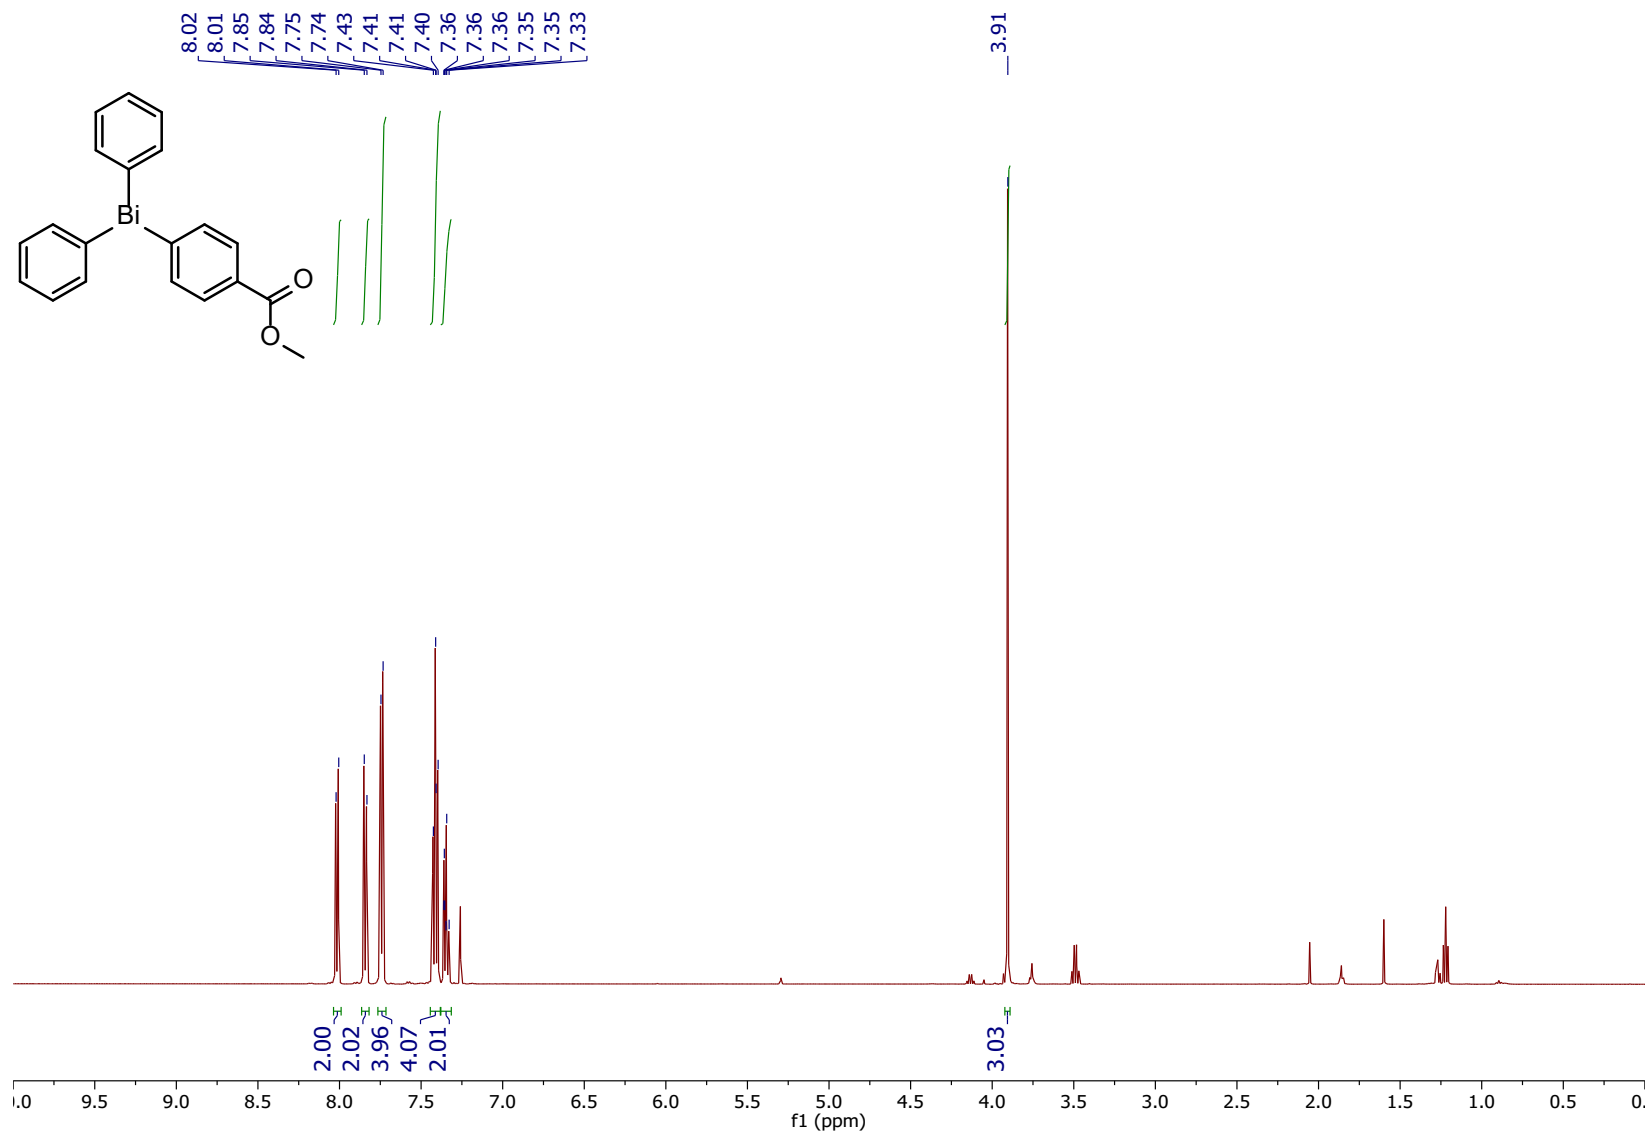

Figure S25.  $^1\text{H}$  NMR of **1d** in  $\text{CDCl}_3$

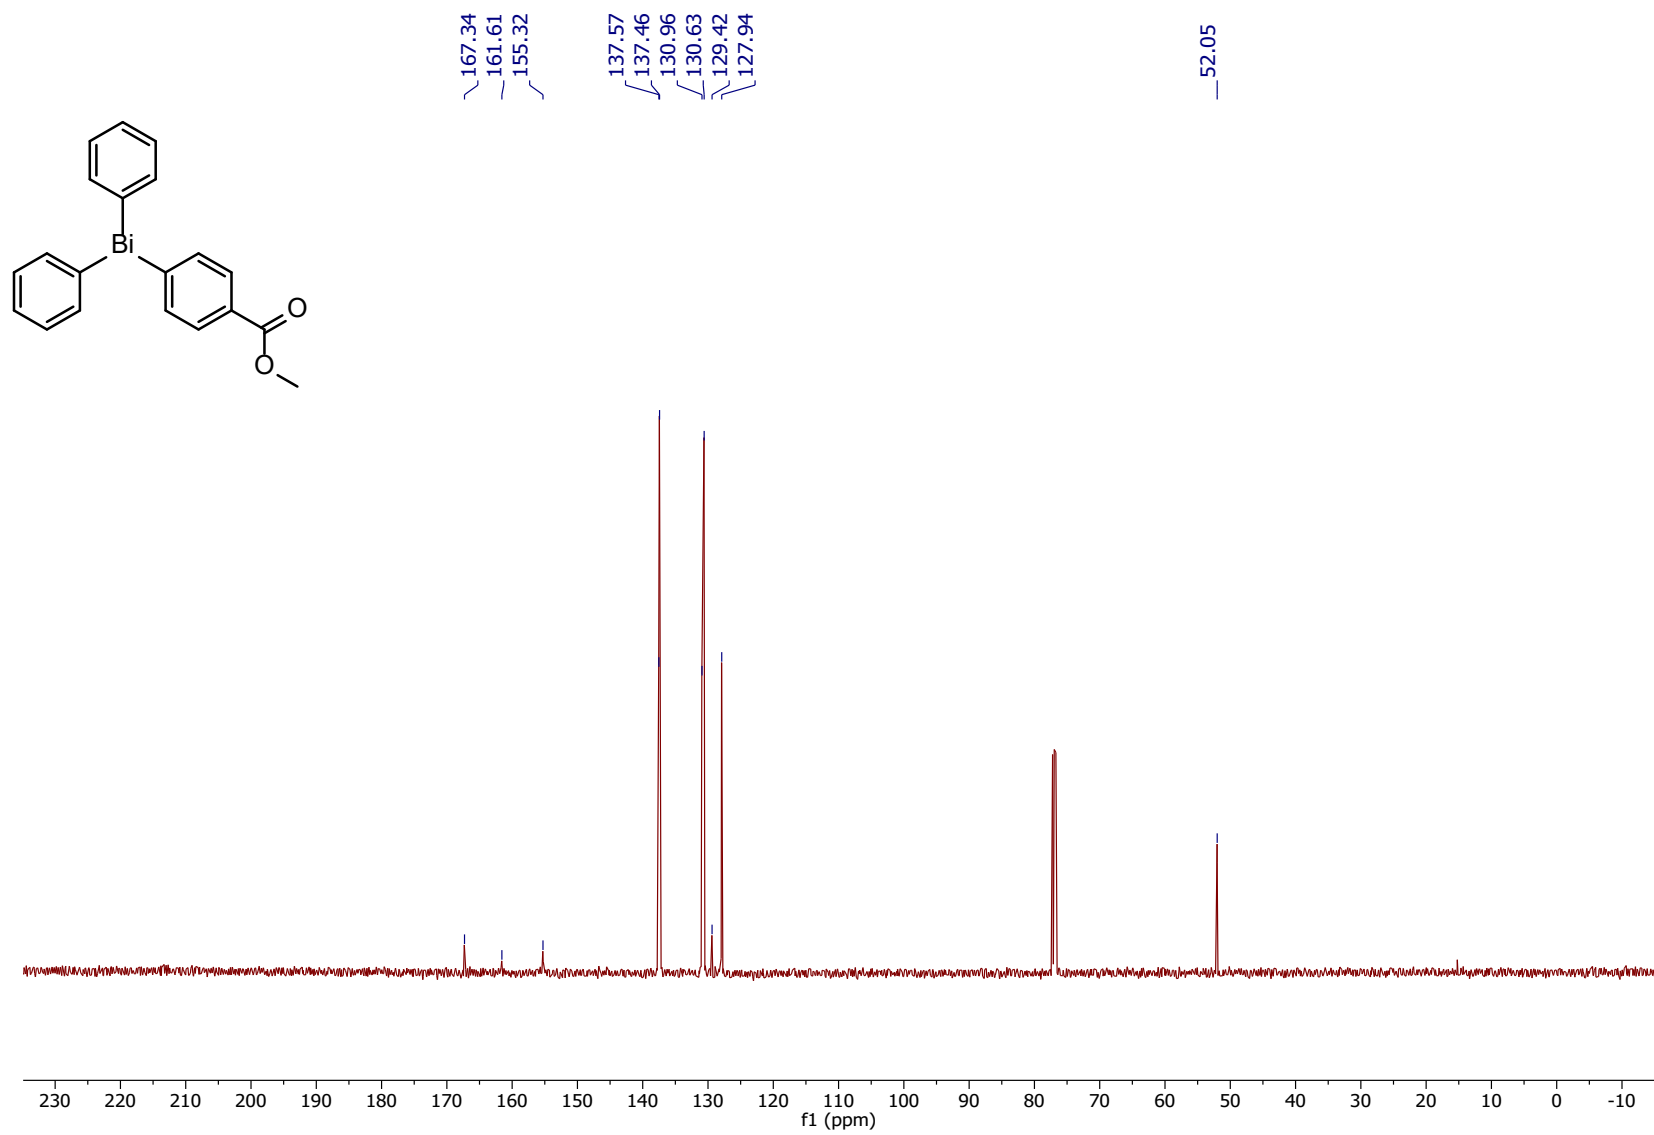

Figure S26. <sup>13</sup>C {<sup>1</sup>H} NMR of **1d** in CDCl<sub>3</sub>



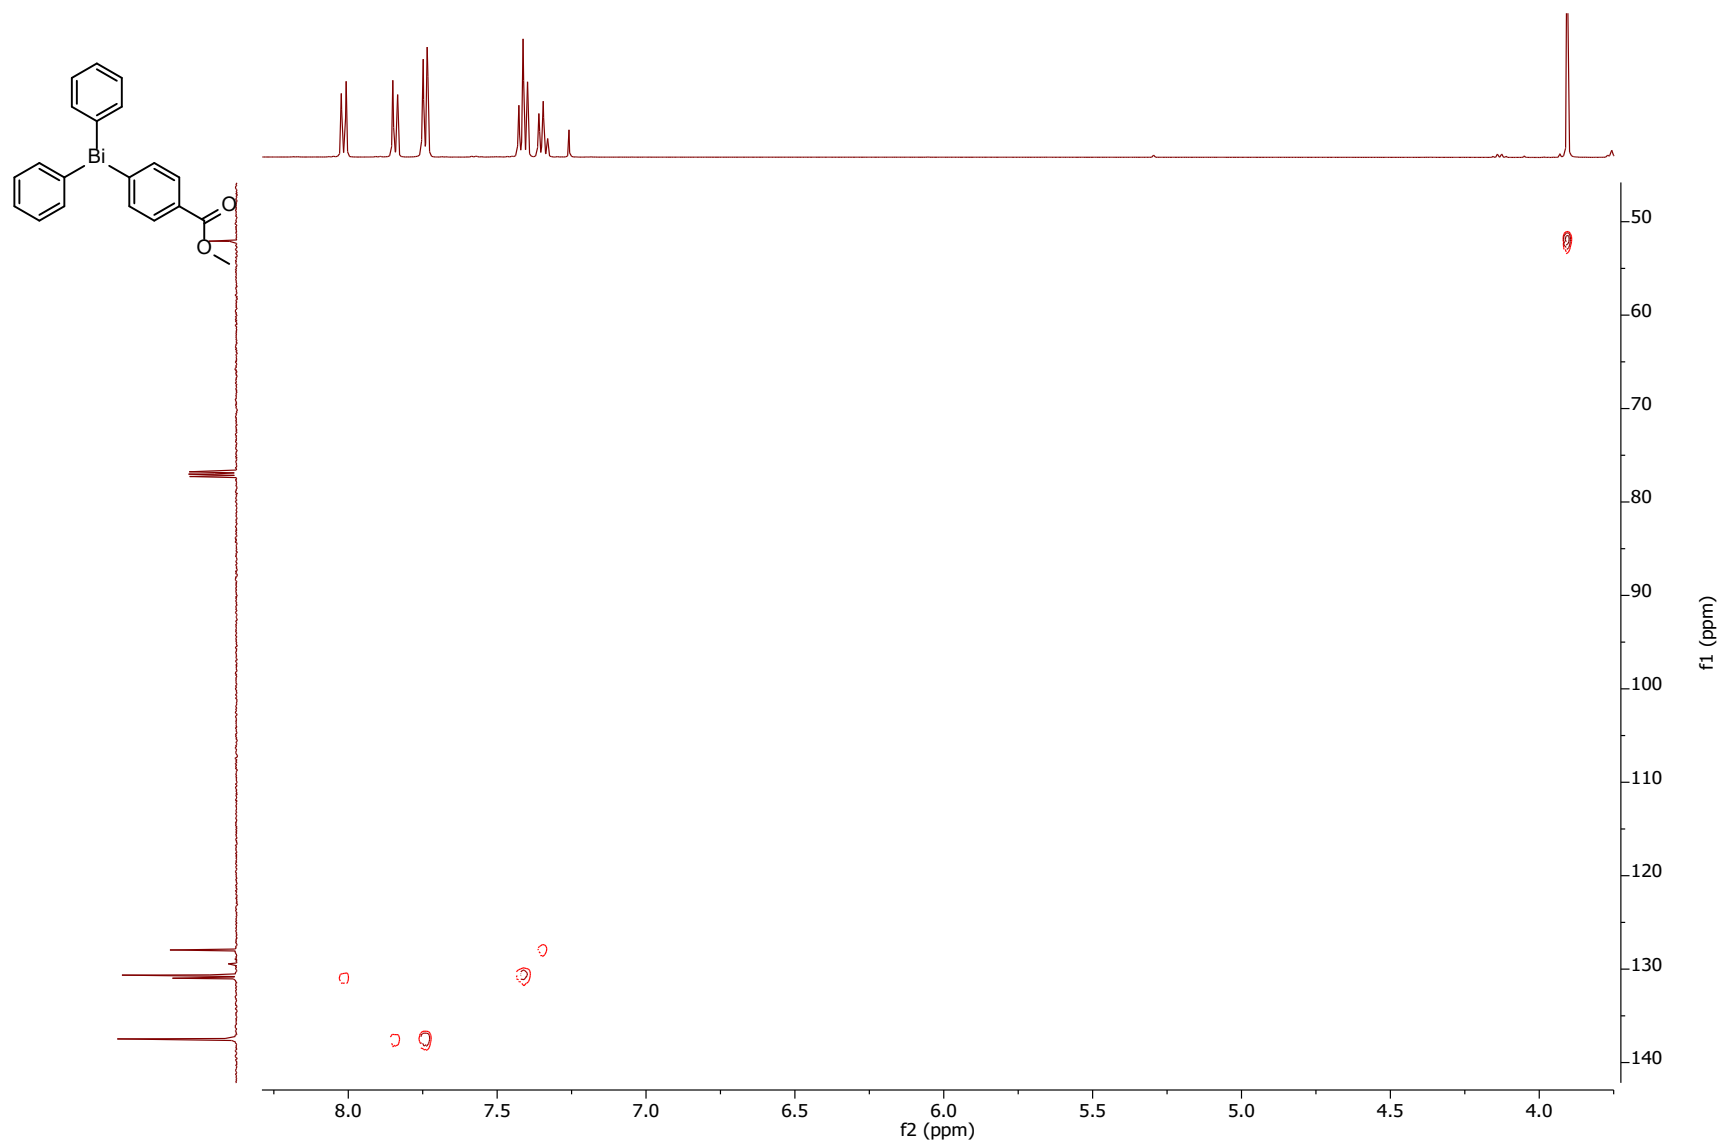

**Figure S28.** 2D HSQC of **1d** in  $\text{CDCl}_3$



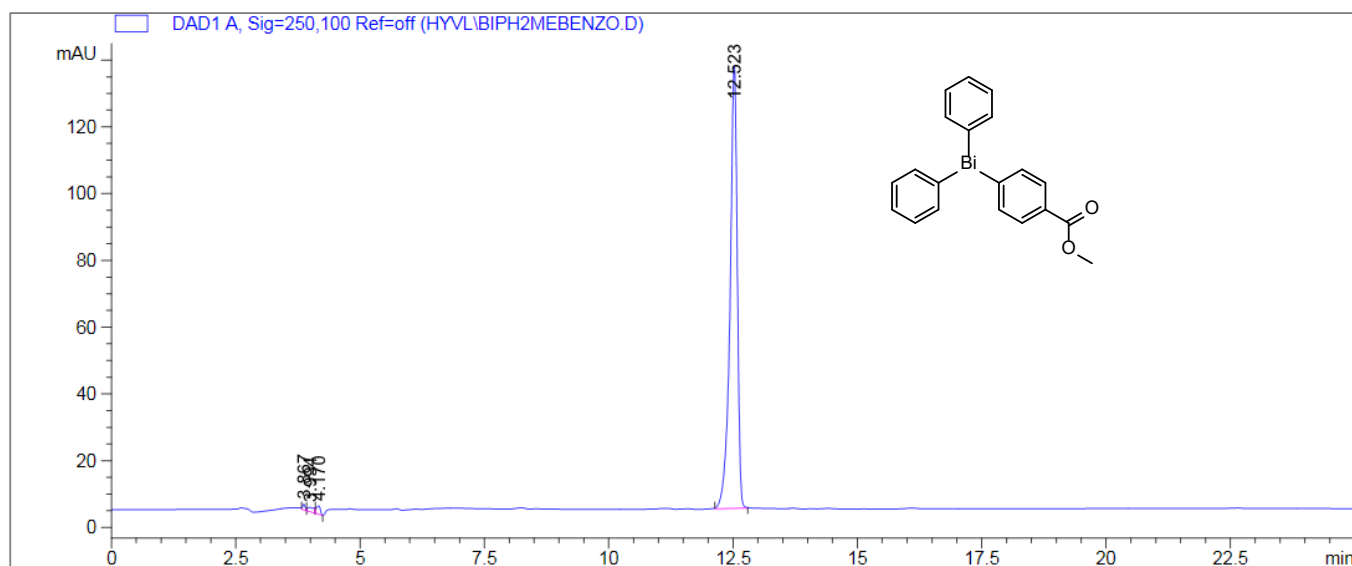

=====  
Area Percent Report  
=====

Sorted By : Signal  
Multiplier: : 1.0000  
Dilution: : 1.0000  
Sample Amount: : 20.00000 [ng/ul] (not used in calc.)  
Use Multiplier & Dilution Factor with ISTDs

Signal 1: DAD1 A, Sig=250,100 Ref=off

| Peak # | RetTime [min] | Type | Width [min] | Area [mAU*s] | Height [mAU] | Area %  |
|--------|---------------|------|-------------|--------------|--------------|---------|
| 1      | 3.867         | BV   | 0.0574      | 6.39290      | 1.71725      | 0.4643  |
| 2      | 3.994         | VB   | 0.1184      | 12.02068     | 1.34342      | 0.8730  |
| 3      | 4.170         | BV   | 0.0775      | 13.59000     | 2.57776      | 0.9870  |
| 4      | 12.523        | BB   | 0.1522      | 1344.91504   | 132.69420    | 97.6757 |

**Figure S29.** HPLC Chromatogram of **1d**

## NMR Spectra and EA Report of Compound 1e

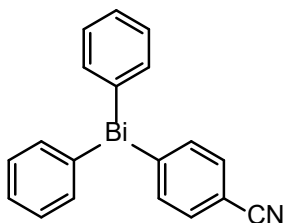

Chemical Formula: BiNC<sub>19</sub>H<sub>14</sub>

Molecular Weight: 465.31

Elemental Analysis: C: 49.04; Bi: 44.91; H: 3.03; N: 3.01

CENTC Elemental Analysis Facility  
University of Rochester  
Rochester, NY 14627 USA  
Email: ealab@chem.rochester.edu

|                |                              |         |               |
|----------------|------------------------------|---------|---------------|
| Date of report | 5/10/2019 2:29:53PM          |         |               |
| User ID        | Administrator                |         |               |
| Comments       | TLG_1_158 [H <sub>2</sub> O] |         |               |
| DATE & TIME    | 5/10/2019 11:40:34 AM        | P_ID    | EA LAB        |
| SAMPLE ID      | 19287                        | USER ID | Administrator |
| WEIGHT (mg)    | 2.221                        | MODE    | CHN           |
|                | CARBON                       | 49.139% |               |
|                | HYDROGEN                     | 2.959%  |               |
|                | NITROGEN                     | 2.929%  |               |

### Acknowledgment

Analytical data were obtained from the CENTC Elemental Analysis Facility at the University of Rochester, funded by NSF CHE-0650456.

### Instrumentation

Microanalysis samples were weighed with a PerkinElmer Model AD6000 Autobalance and their compositions were determined with a PerkinElmer 2400 Series II Analyzer.

**Figure S30.** EA report for 1e

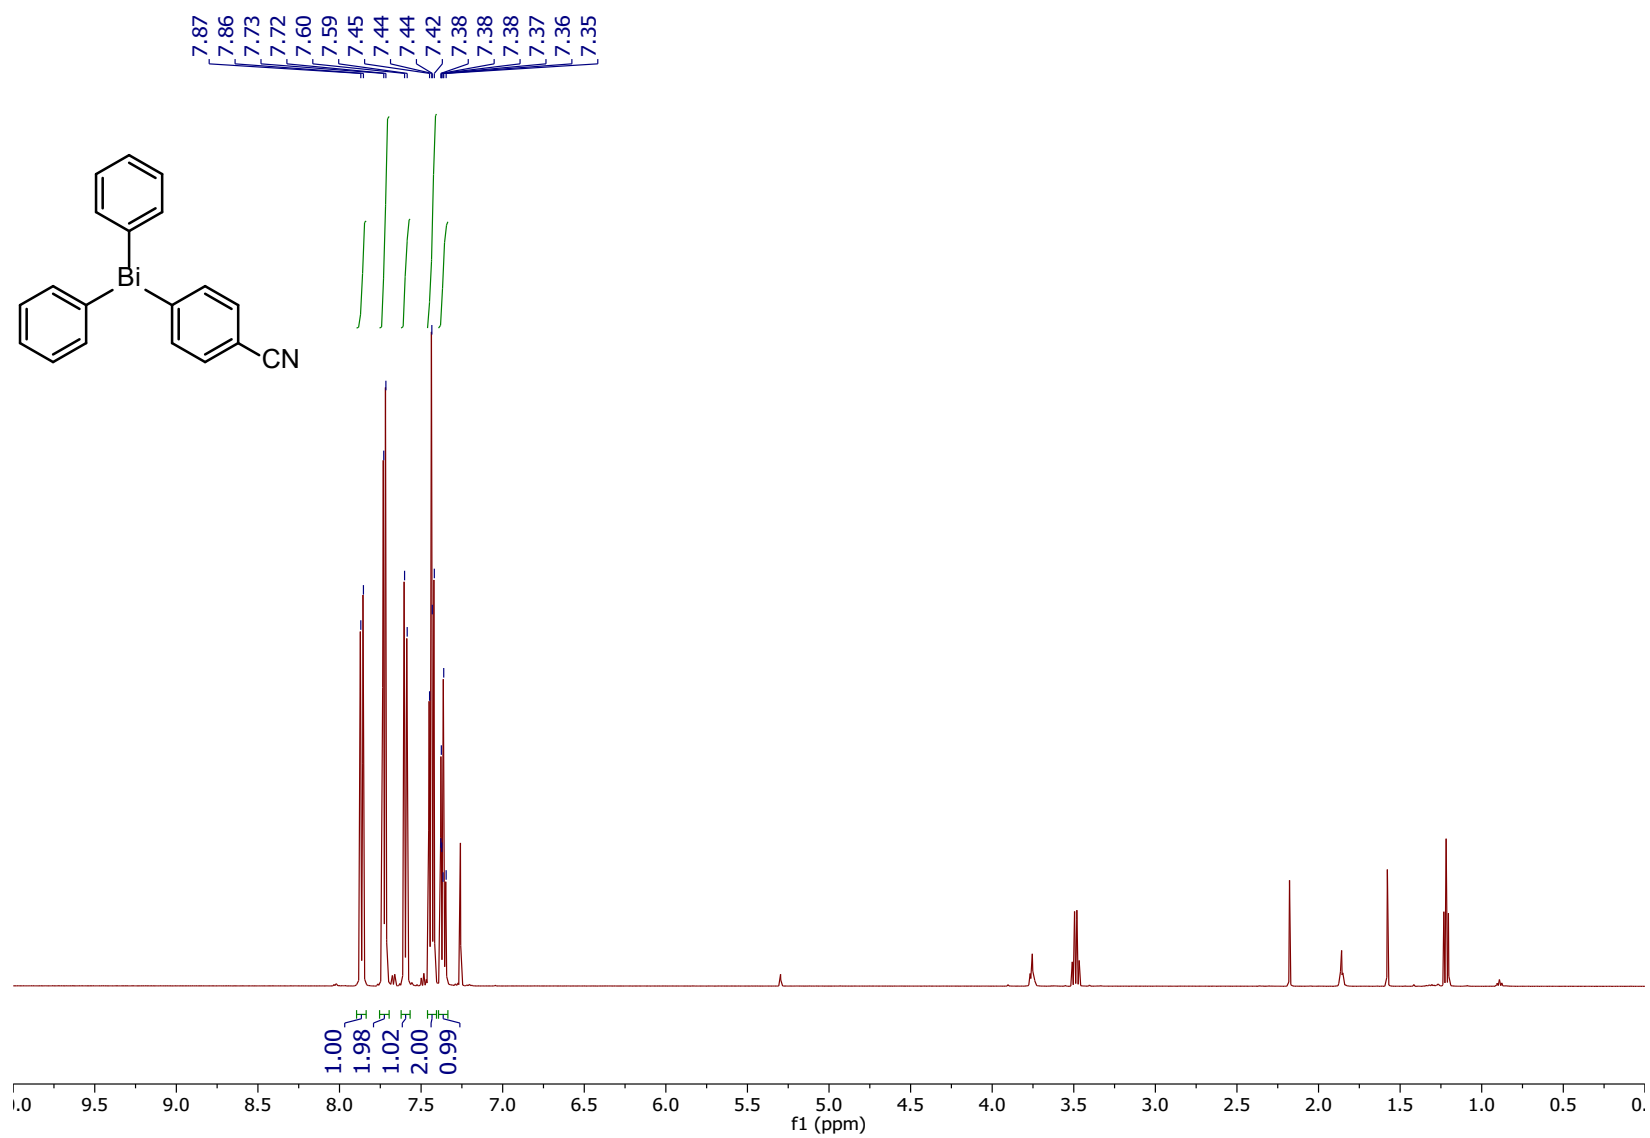

**Figure S31.** <sup>1</sup>H NMR of **1e** in CDCl<sub>3</sub>

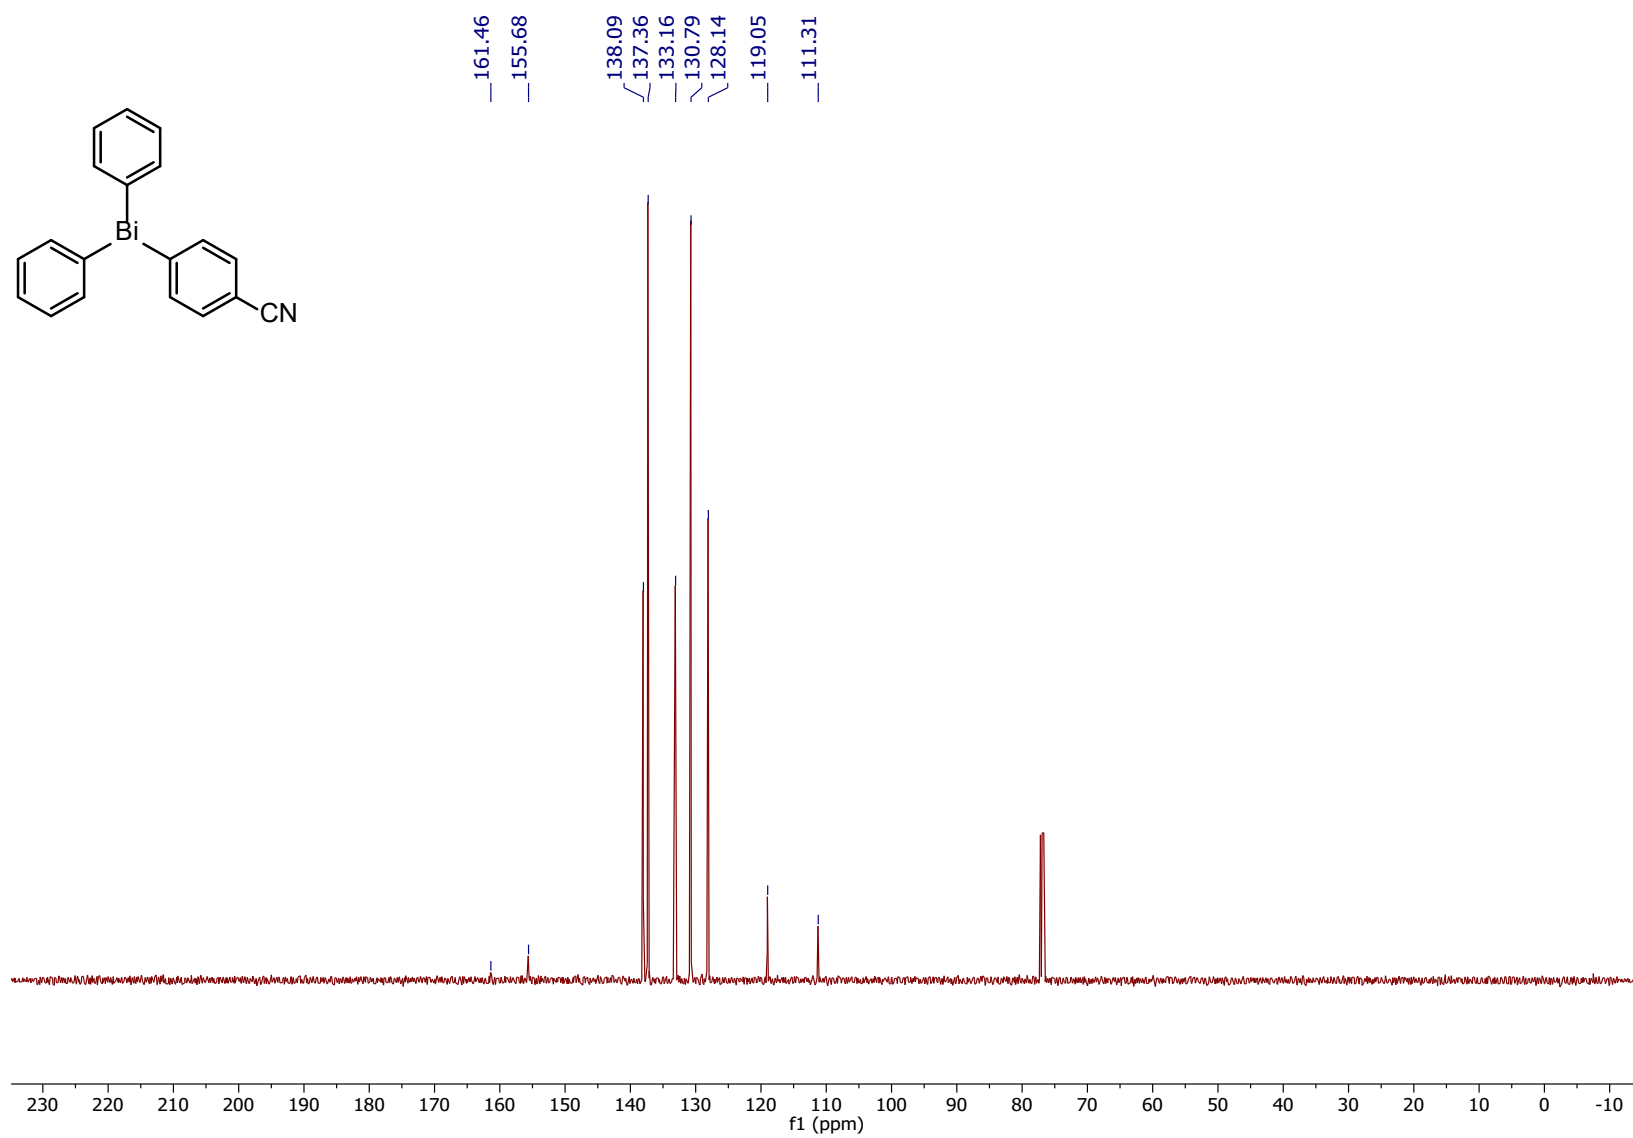

Figure S32.  $^{13}\text{C}$   $\{^1\text{H}\}$  NMR of **1e** in CDCl<sub>3</sub>

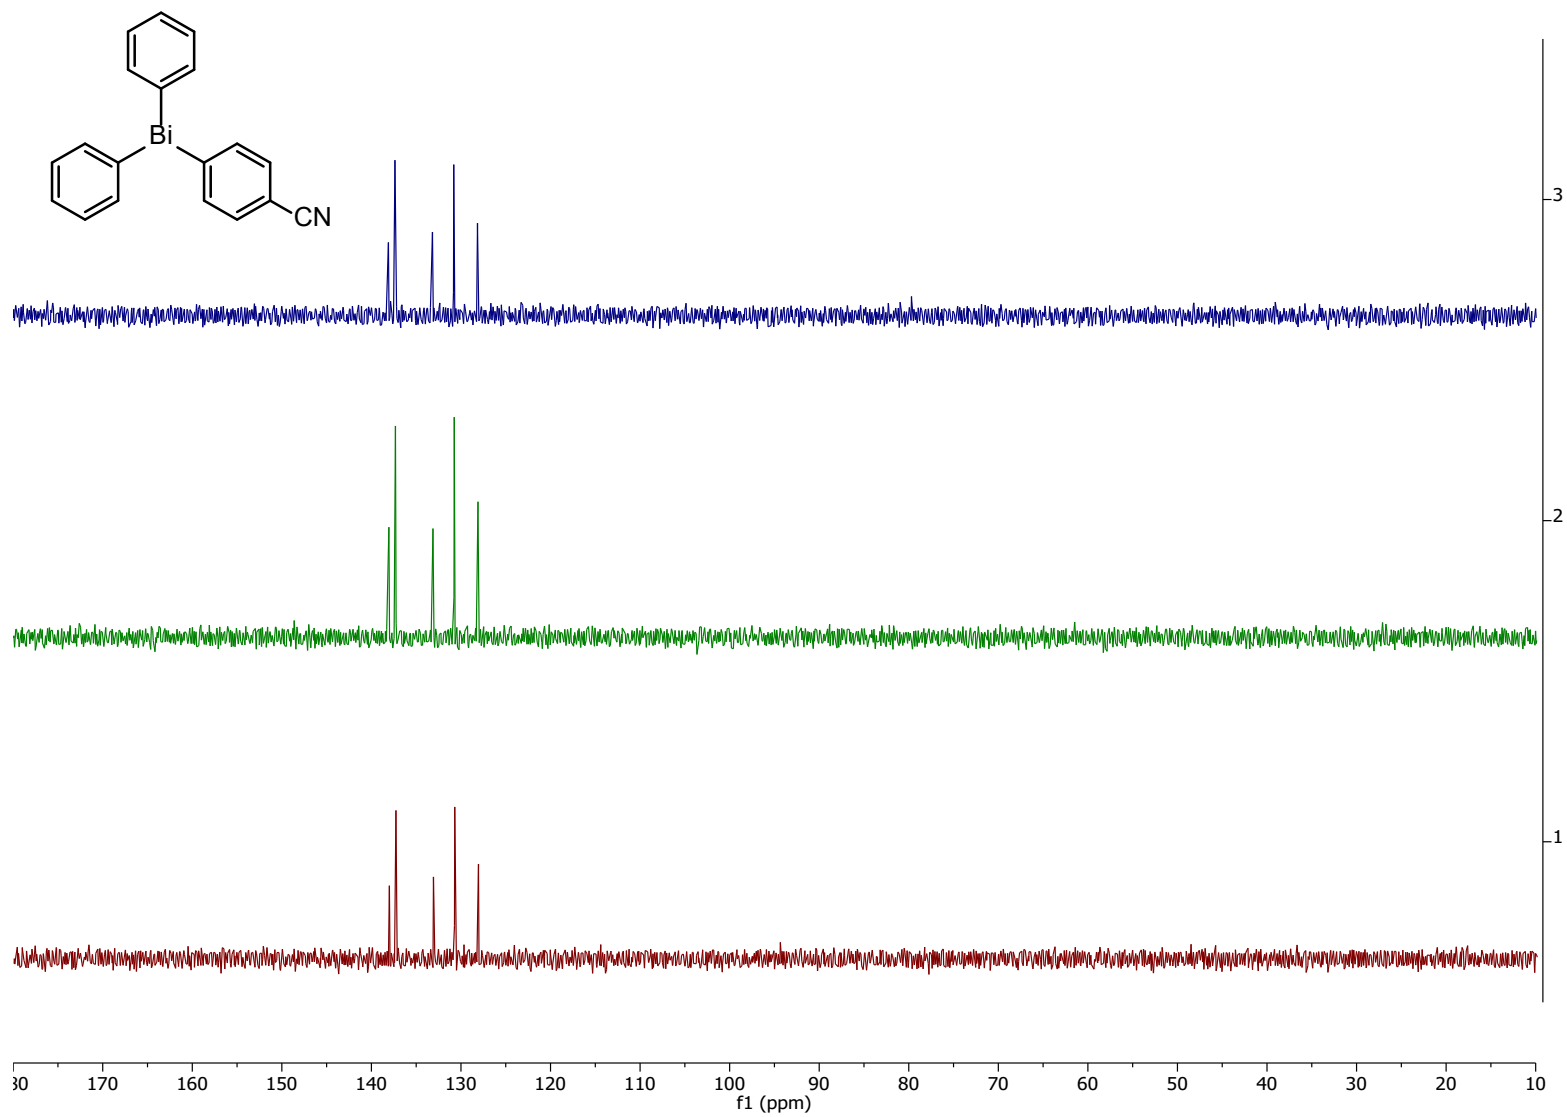

Figure S33.  $^{13}\text{C}$  DEPT of **1e** in  $\text{CDCl}_3$

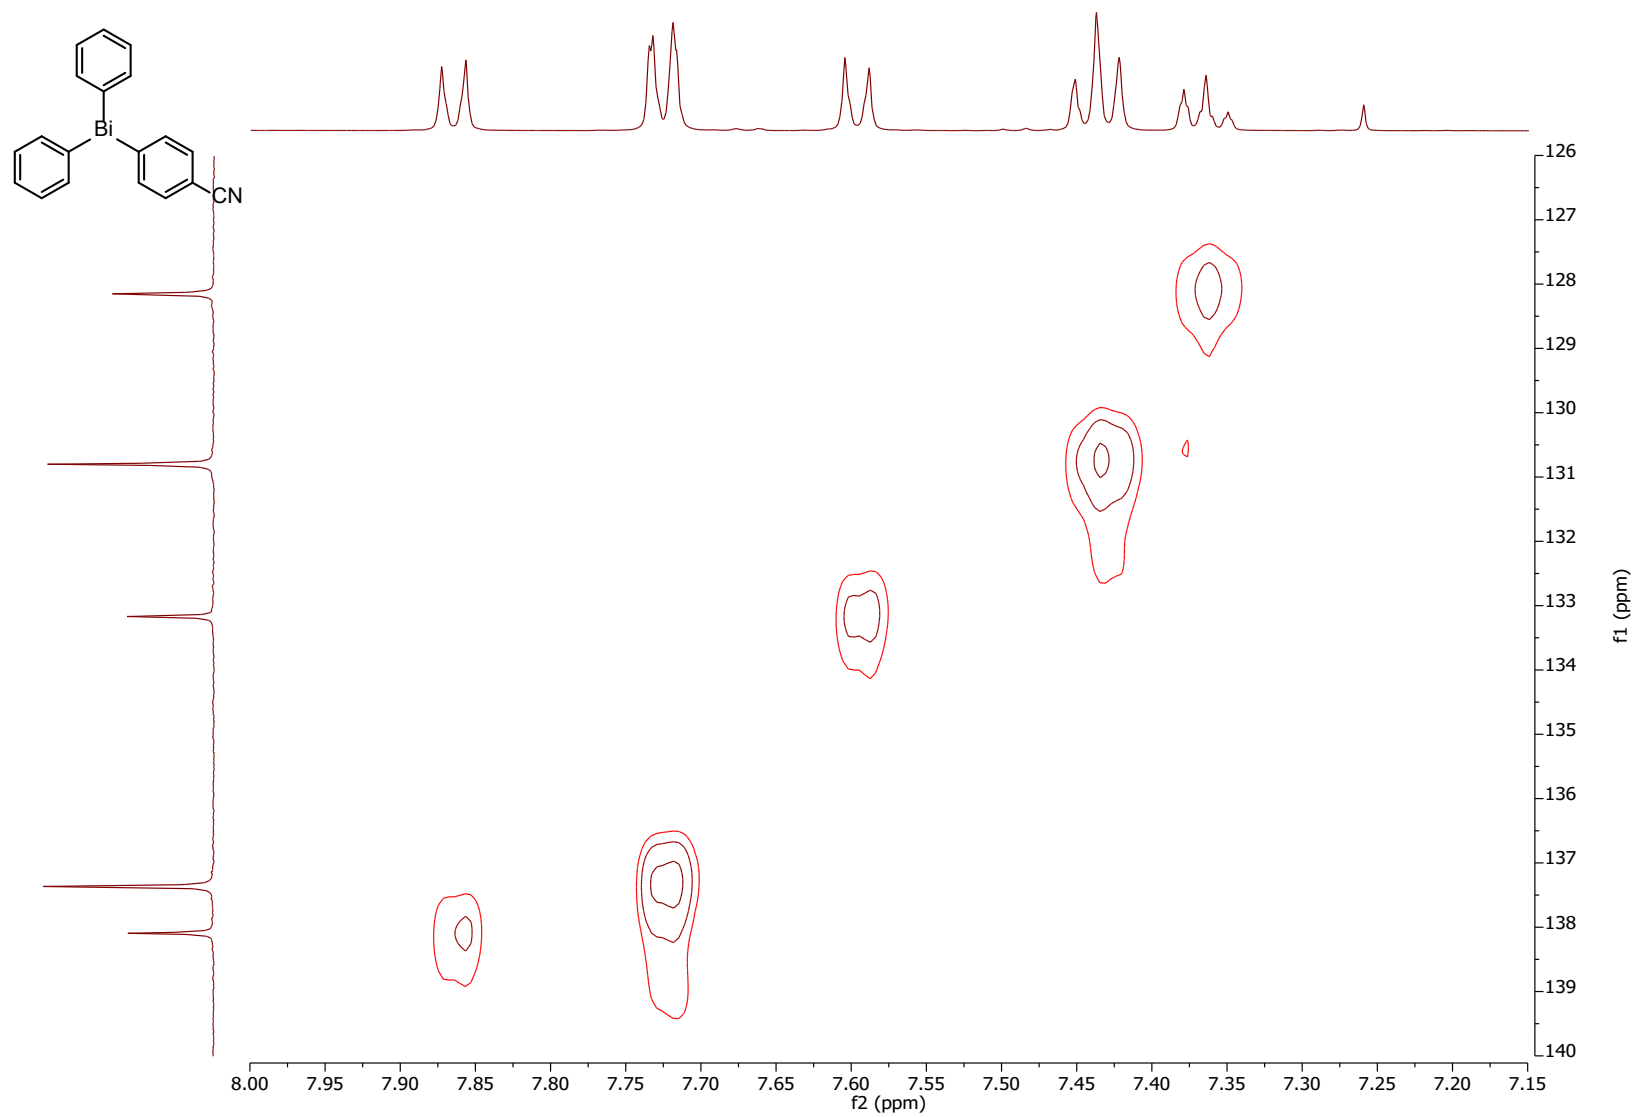

**Figure S34.** 2D HSQC of **1e** in  $\text{CDCl}_3$

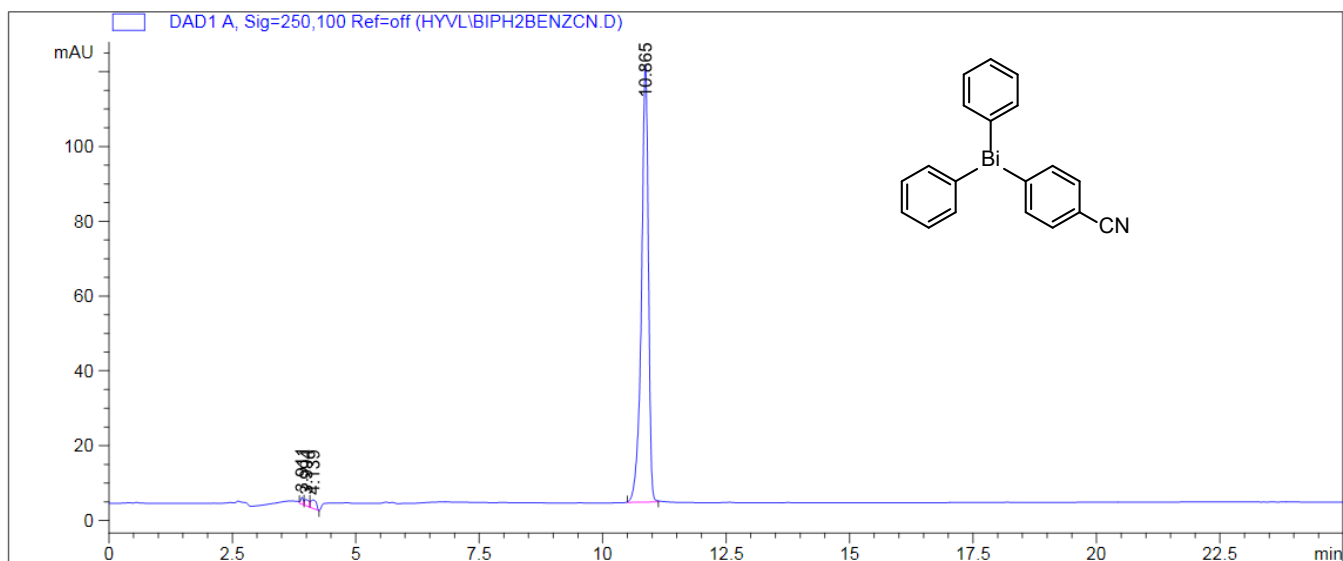

```

=====
                        Area Percent Report
=====

Sorted By           :      Signal
Multiplier:         :      1.0000
Dilution:           :      1.0000
Sample Amount:       :      20.00000 [ng/ul]   (not used in calc.)
Use Multiplier & Dilution Factor with ISTDs
  
```

Signal 1: DAD1 A, Sig=250,100 Ref=off

| Peak # | RetTime [min] | Type | Width [min] | Area [mAU*s] | Height [mAU] | Area %  |
|--------|---------------|------|-------------|--------------|--------------|---------|
| 1      | 3.911         | BV   | 0.0556      | 6.93817      | 1.85545      | 0.5882  |
| 2      | 3.994         | VV   | 0.0904      | 10.98717     | 1.67865      | 0.9315  |
| 3      | 4.139         | VV   | 0.1026      | 17.91453     | 2.30757      | 1.5188  |
| 4      | 10.865        | BB   | 0.1480      | 1143.66382   | 117.06699    | 96.9614 |

**Figure S35.** HPLC Chromatogram of **1e**

## NMR Spectra and EA Report of Compound 1f

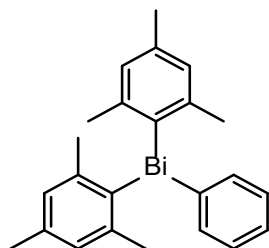

Chemical Formula:  $\text{BiC}_{24}\text{H}_{27}$

Molecular Weight: 524.46

Elemental Analysis: C: 54.96; Bi: 39.85; H: 5.19

CENTC Elemental Analysis Facility  
University of Rochester  
Rochester, NY 14627 USA  
Email: ealab@chem.rochester.edu

|                |                              |
|----------------|------------------------------|
| Date of report | 5/31/2019 4:52:06PM          |
| User ID        | Administrator                |
| Comments       | TLG_1_165 [H <sub>2</sub> M] |

|             |                      |         |               |
|-------------|----------------------|---------|---------------|
| DATE & TIME | 5/31/2019 2:35:37 PM | P_ID    | EA LAB        |
| SAMPLE ID   | 19330                | USER ID | Administrator |
| WEIGHT (mg) | 2.268                | MODE    | CHN           |

|          |         |
|----------|---------|
| CARBON   | 54.939% |
| HYDROGEN | 4.798%  |
| NITROGEN | -.131%  |

### Acknowledgment

Analytical data were obtained from the CENTC Elemental Analysis Facility at the University of Rochester, funded by NSF CHE-0650456.

### Instrumentation

Microanalysis samples were weighed with a PerkinElmer Model AD6000 Autobalance and their compositions were determined with a PerkinElmer 2400 Series II Analyzer.

Figure S36. EA report for 1f



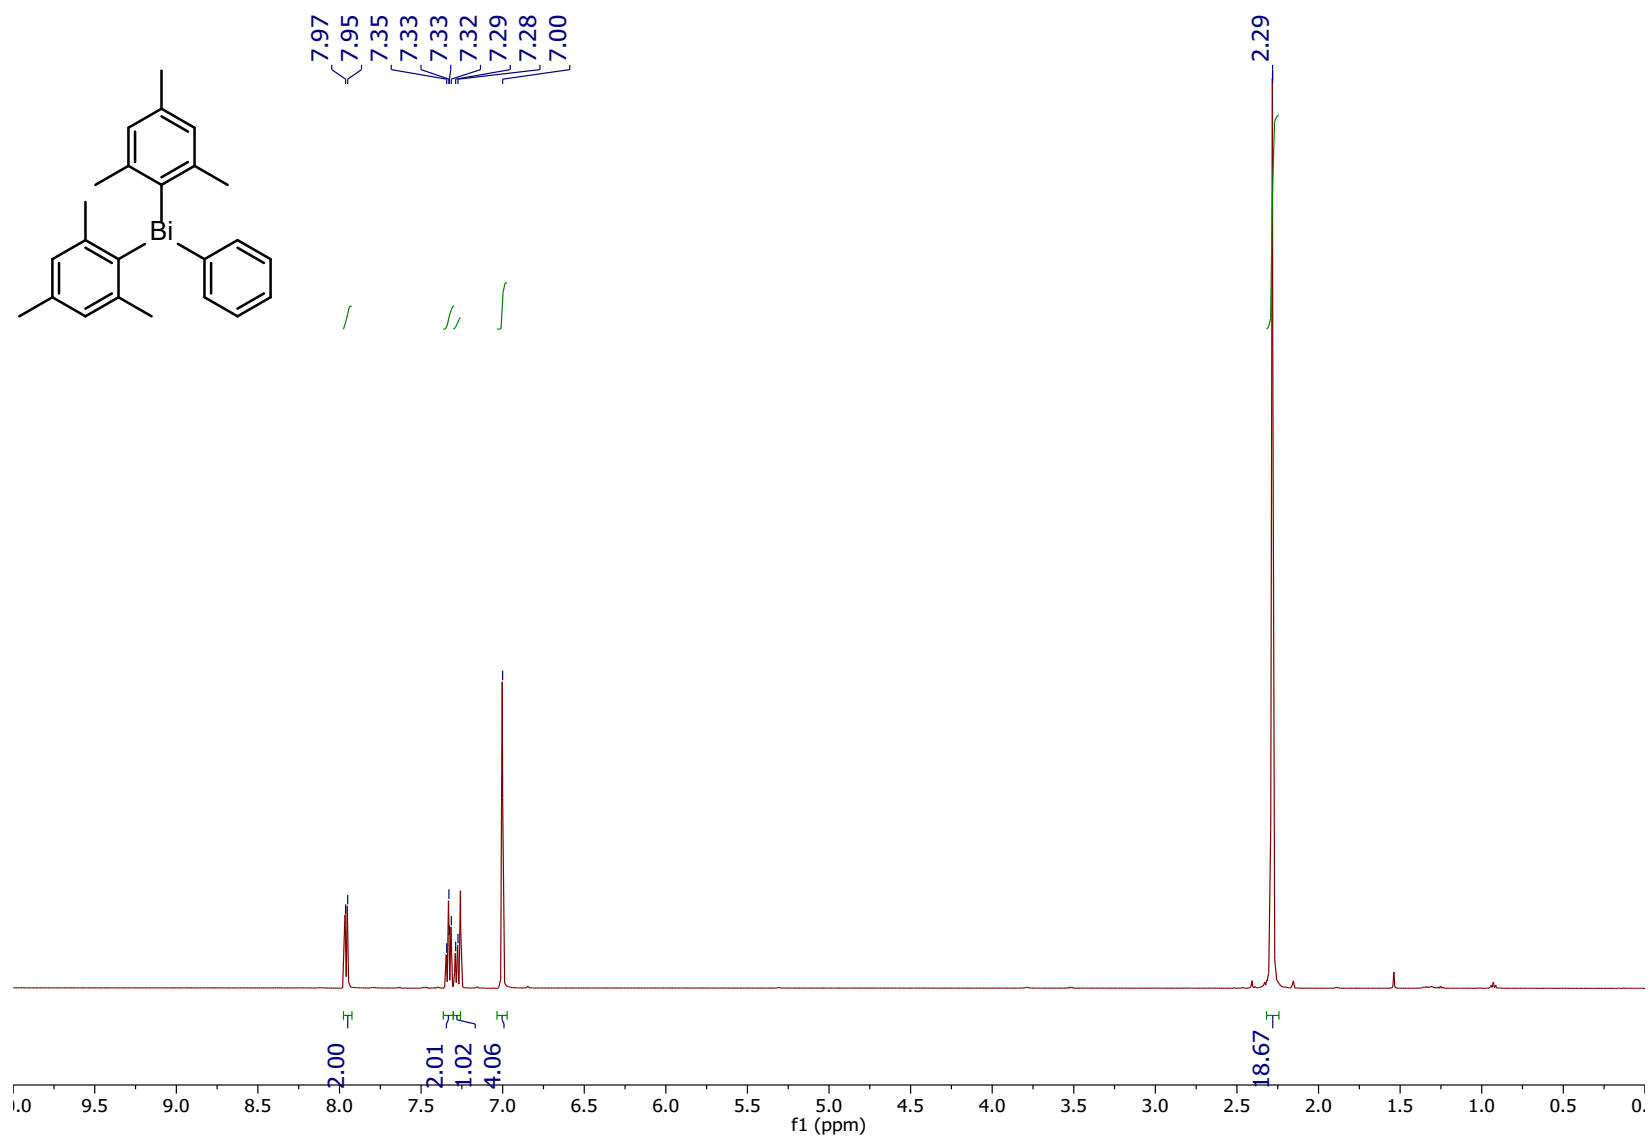

Figure S37.  $^1\text{H}$  NMR of **1f** in  $\text{CDCl}_3$

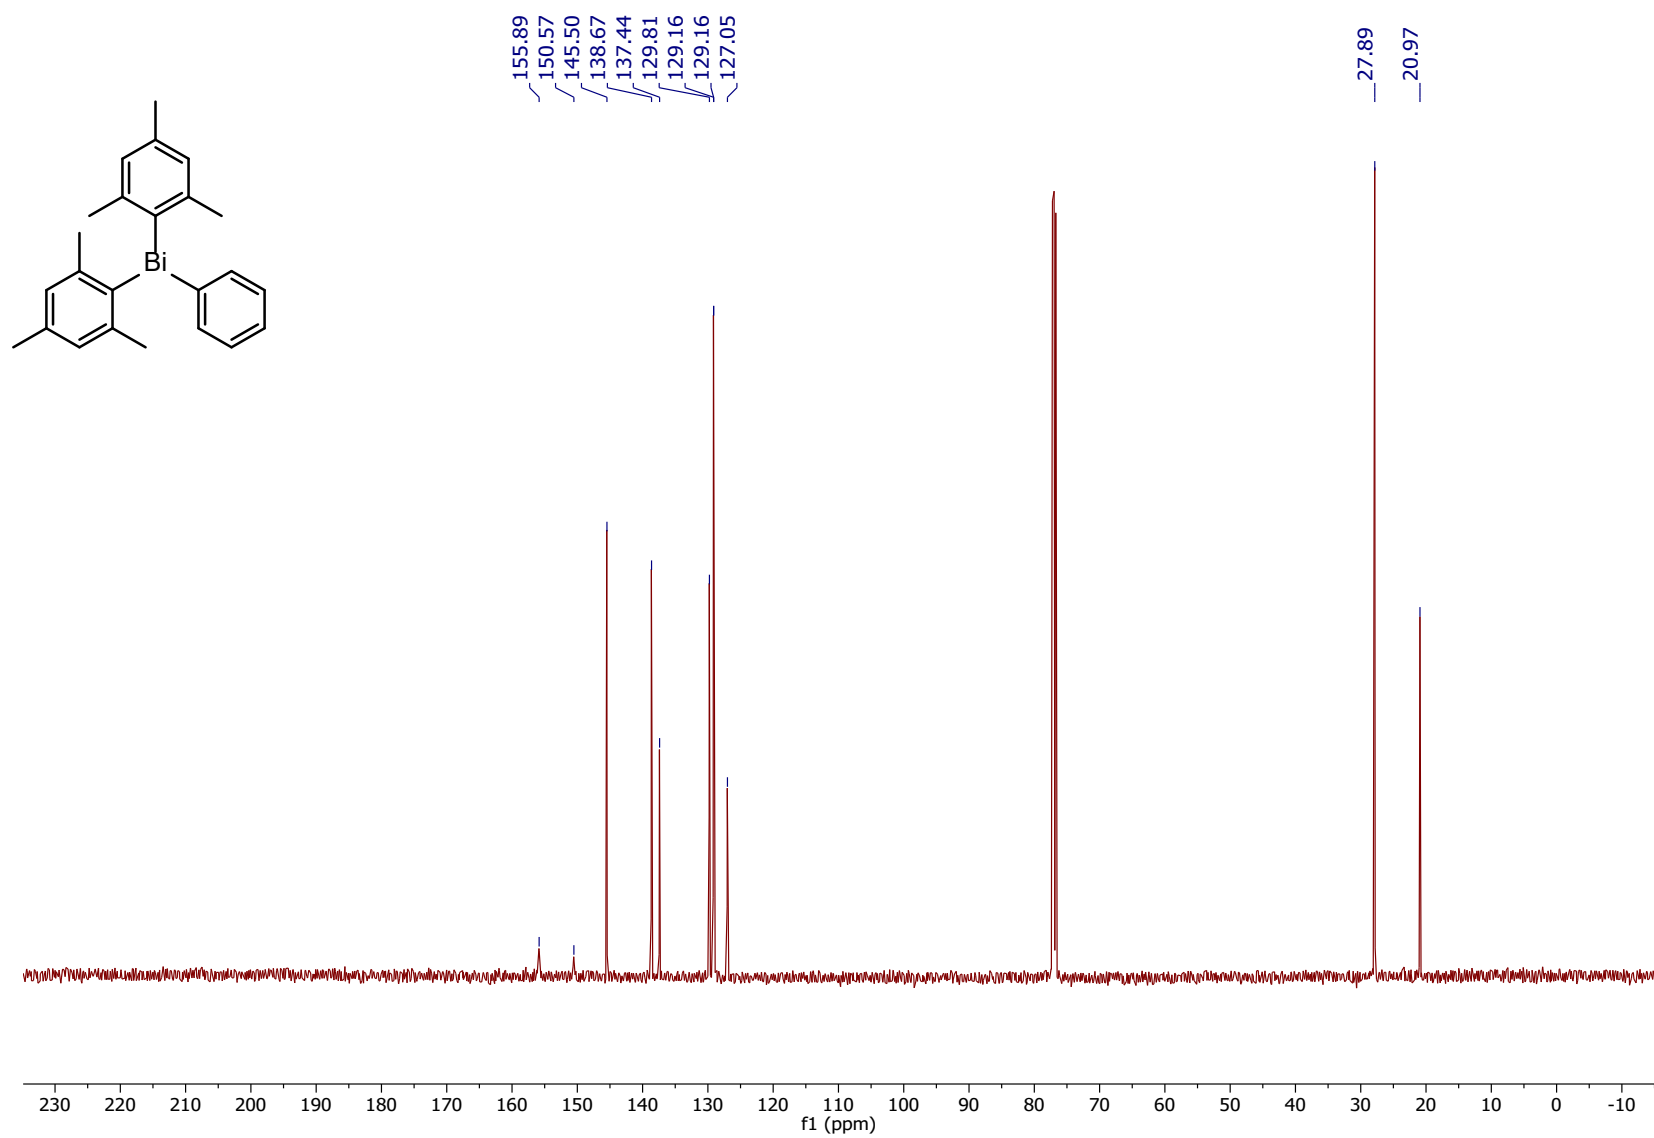

Figure S38.  $^{13}\text{C}$   $\{^1\text{H}\}$  NMR of **1f** in  $\text{CDCl}_3$

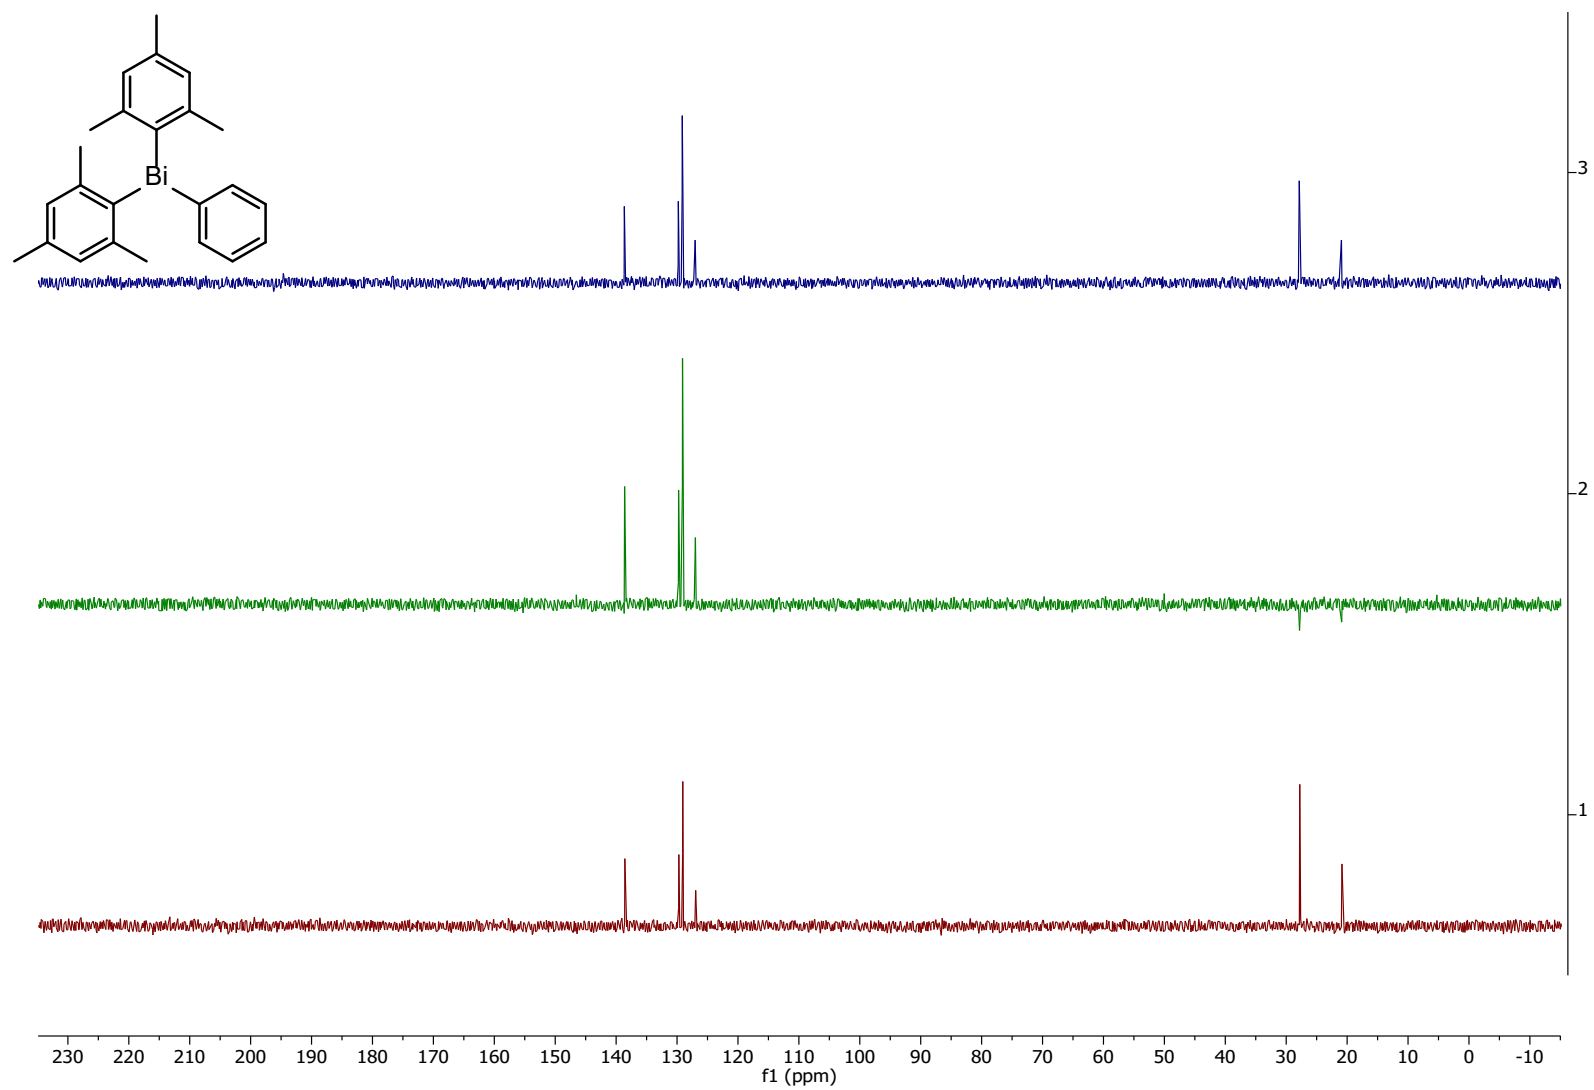

Figure S39.  $^{13}\text{C}$  DEPT of **1f** in  $\text{CDCl}_3$

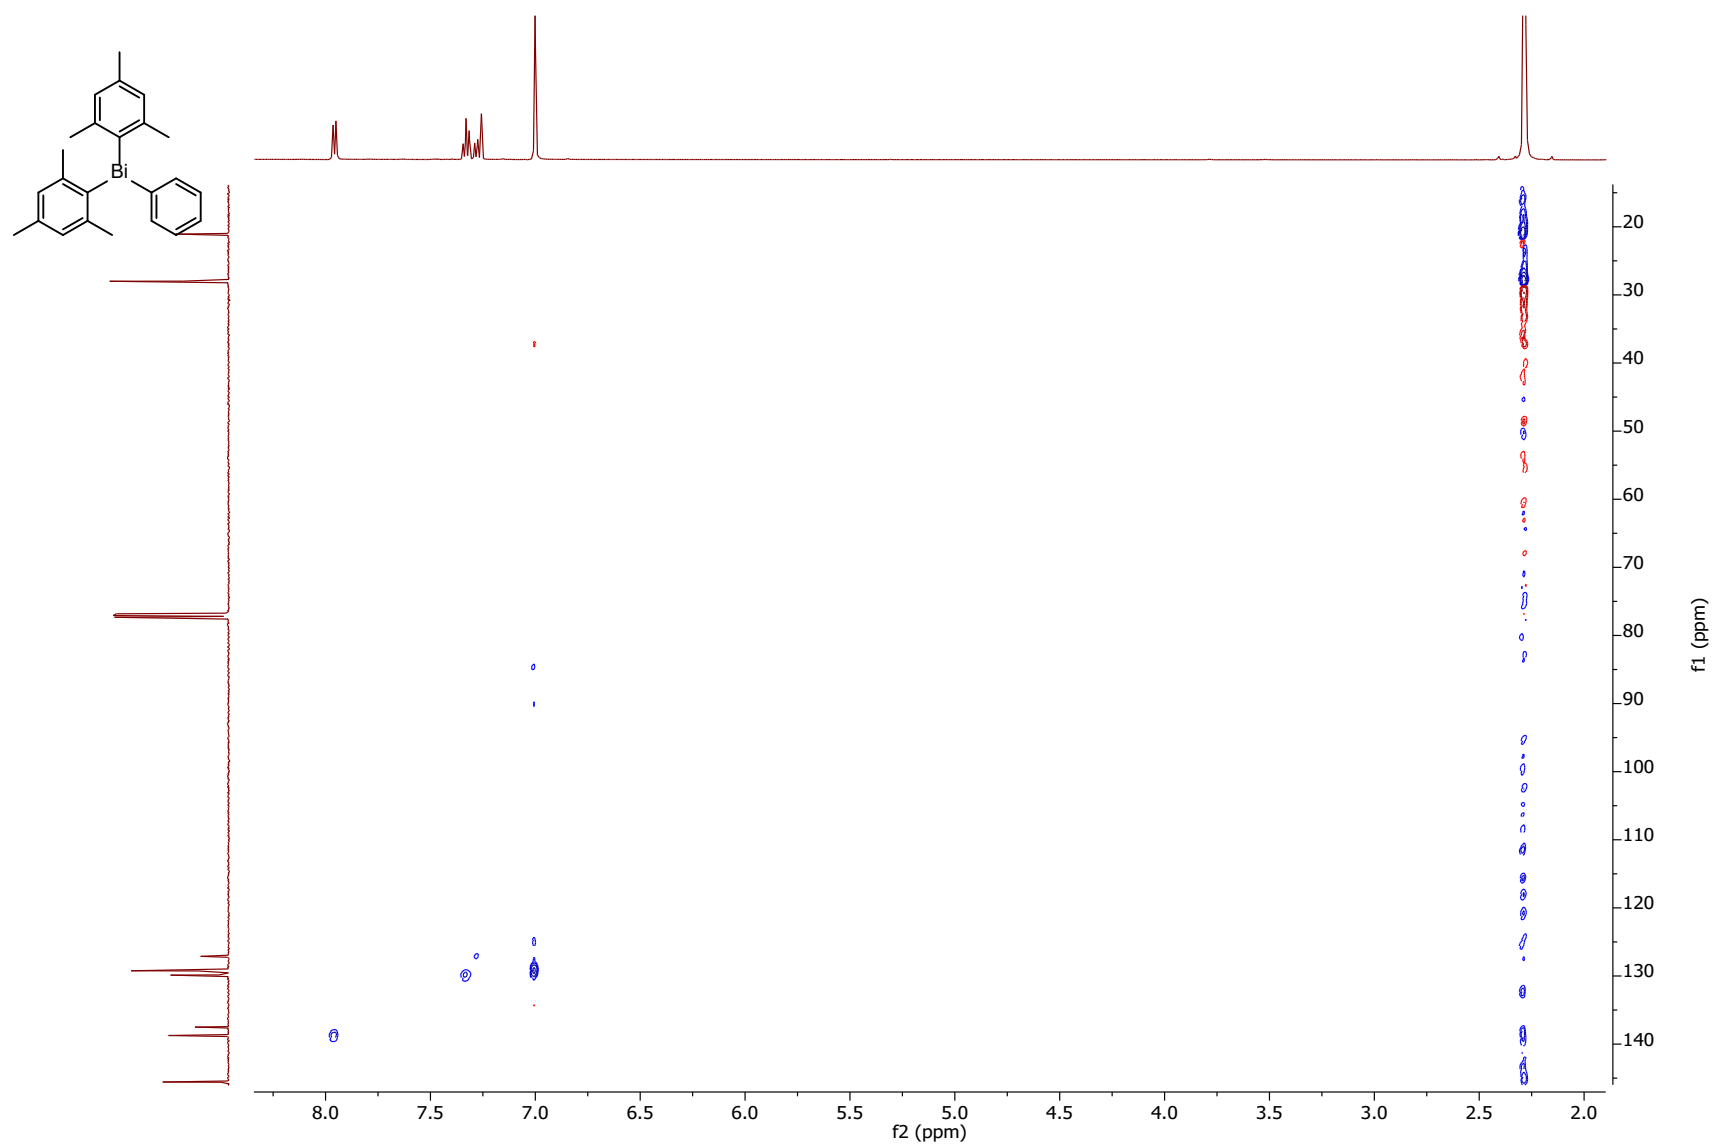

Figure S40. 2D HSQC of **1f** in  $\text{CDCl}_3$

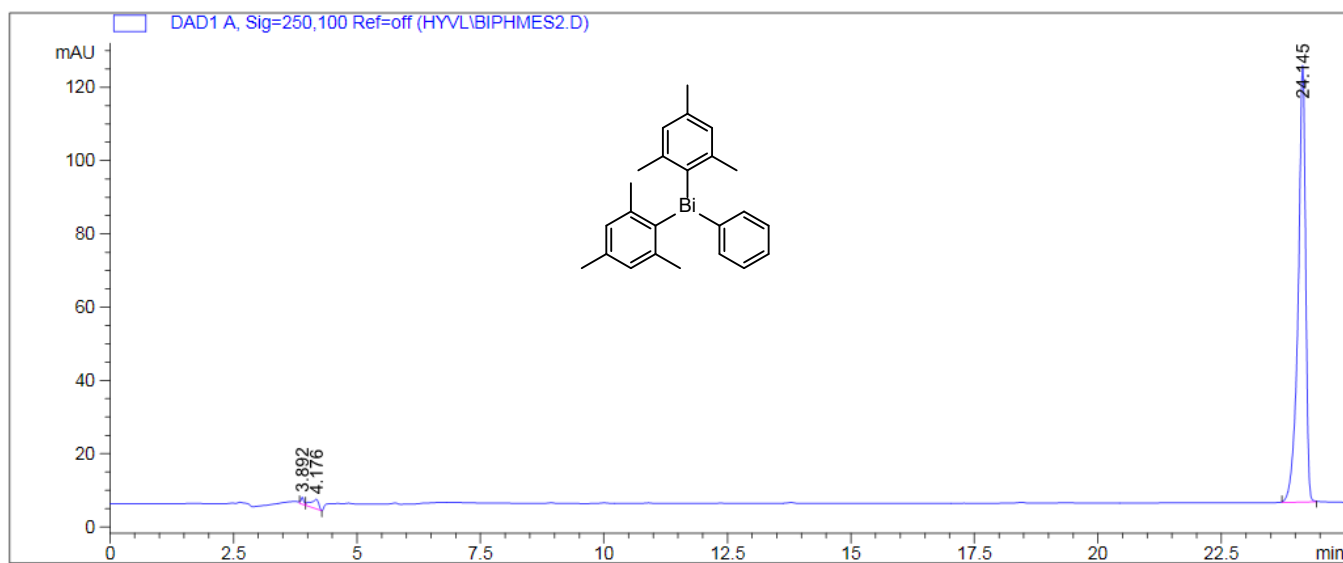

# Area Percent Report

```

Sorted By           :      Signal
Multiplier:         :      1.0000
Dilution:           :      1.0000
Sample Amount:      :      20.00000 [ng/ul]   (not used in calc.)
Use Multiplier & Dilution Factor with ISTDs
  
```

Signal 1: DAD1 A, Sig=250,100 Ref=off

| Peak # | RetTime [min] | Type | Width [min] | Area [mAU*s] | Height [mAU] | Area %  |
|--------|---------------|------|-------------|--------------|--------------|---------|
| 1      | 3.892         | BV   | 0.0598      | 7.99999      | 1.95155      | 0.6197  |
| 2      | 4.176         | VV   | 0.1464      | 27.91670     | 2.66161      | 2.1623  |
| 3      | 24.145        | BB   | 0.1568      | 1255.12268   | 119.23830    | 97.2180 |

**Figure S41.** HPLC Chromatogram of **1f**

## NMR Spectra and EA Report of Compound 1g

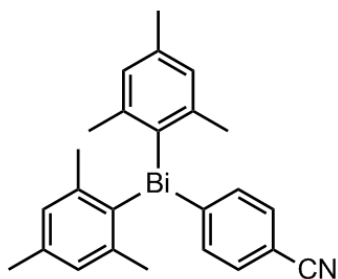

Chemical Formula:  $\text{BiC}_{25}\text{H}_{26}\text{N}$

Molecular Weight: 549.47

Elemental Analysis: C: 54.65; Bi: 38.03; H: 4.77; N:2.35

CENTC Elemental Analysis Facility  
University of Rochester  
Rochester, NY 14627 USA  
Email: ealab@chem.rochester.edu

|                |                     |
|----------------|---------------------|
| Date of report | 8/10/2019 5:09:37PM |
| User ID        | Administrator       |
| Comments       | TLG 2_80 [Hym]      |

|             |                      |         |               |
|-------------|----------------------|---------|---------------|
| DATE & TIME | 8/10/2019 5:07:12 PM | P_ID    | EA LAB        |
| SAMPLE ID   | 19515                | USER ID | Administrator |
| WEIGHT (mg) | 2.061                | MODE    | CHN           |

|          |         |
|----------|---------|
| CARBON   | 54.826% |
| HYDROGEN | 4.880%  |
| NITROGEN | 2.395%  |

### Acknowledgment

Analytical data were obtained from the CENTC Elemental Analysis Facility at the University of Rochester, funded by NSF CHE-0650456.

### Instrumentation

Microanalysis samples were weighed with a PerkinElmer Model AD6000 Autobalance and their compositions were determined with a PerkinElmer 2400 Series II Analyzer.

Figure S42. EA report for 1g

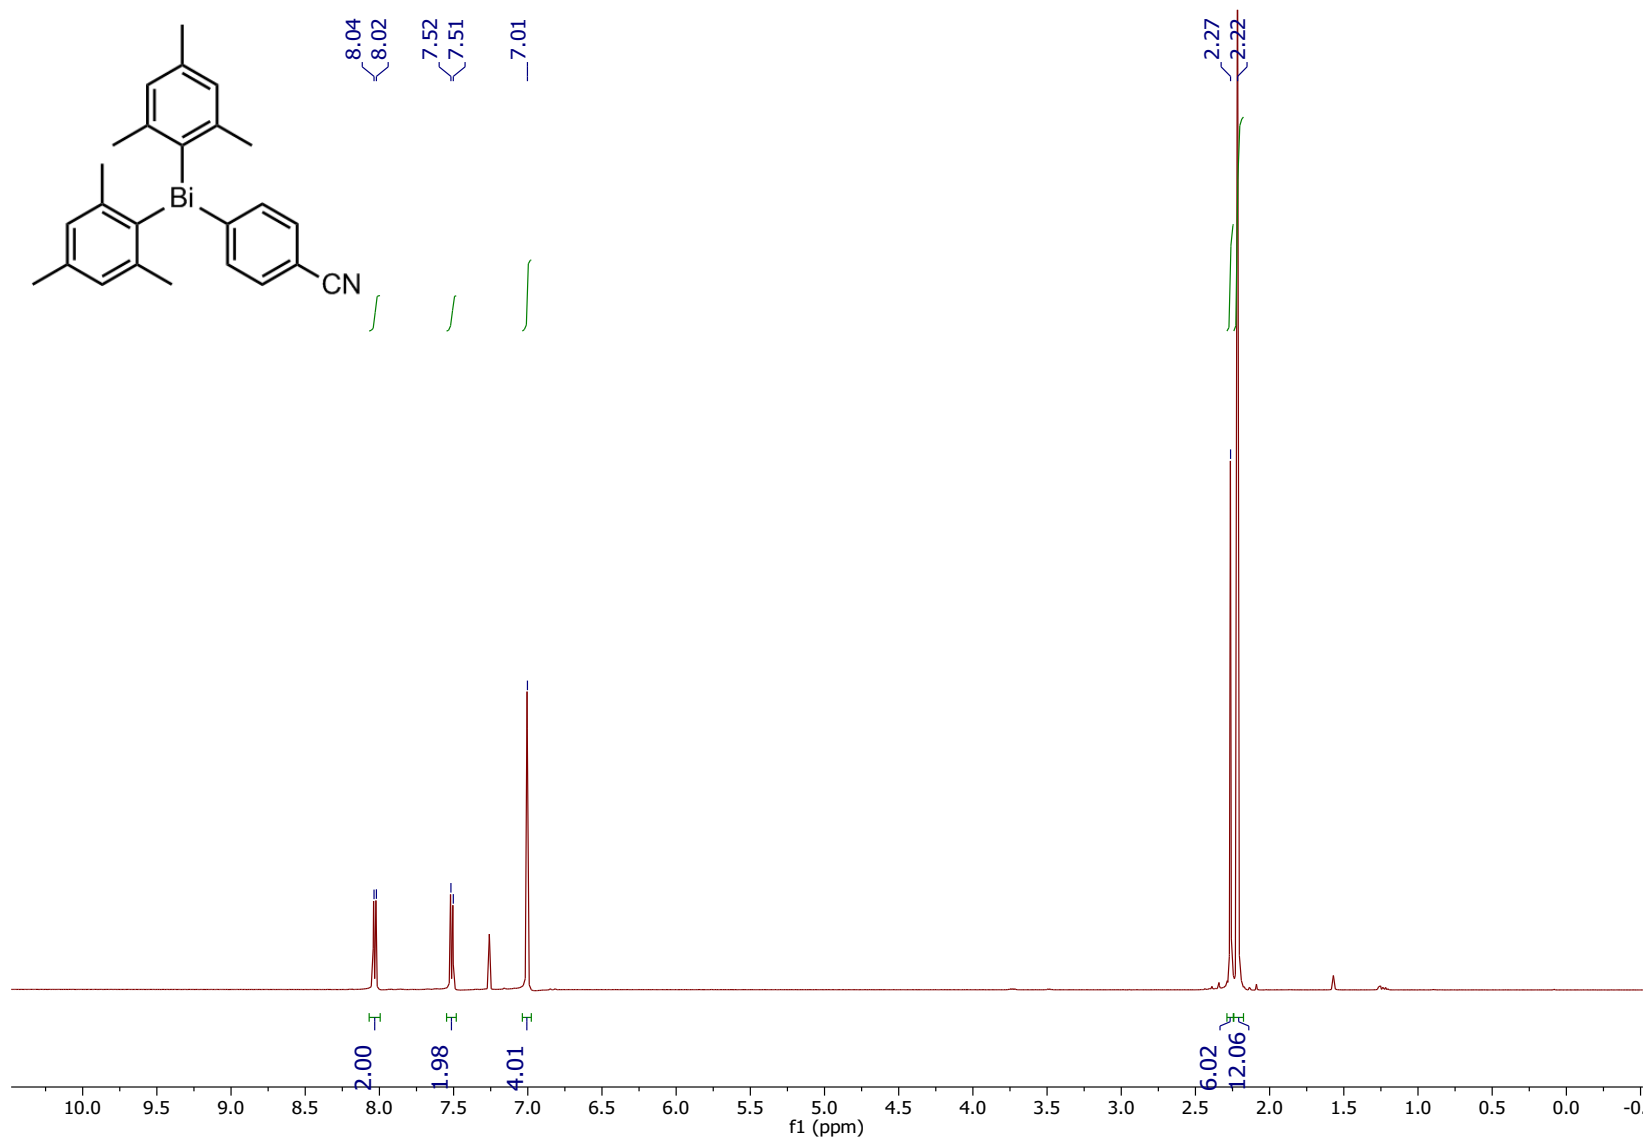

Figure S43.  $^1\text{H}$  NMR of **1g** in  $\text{CDCl}_3$

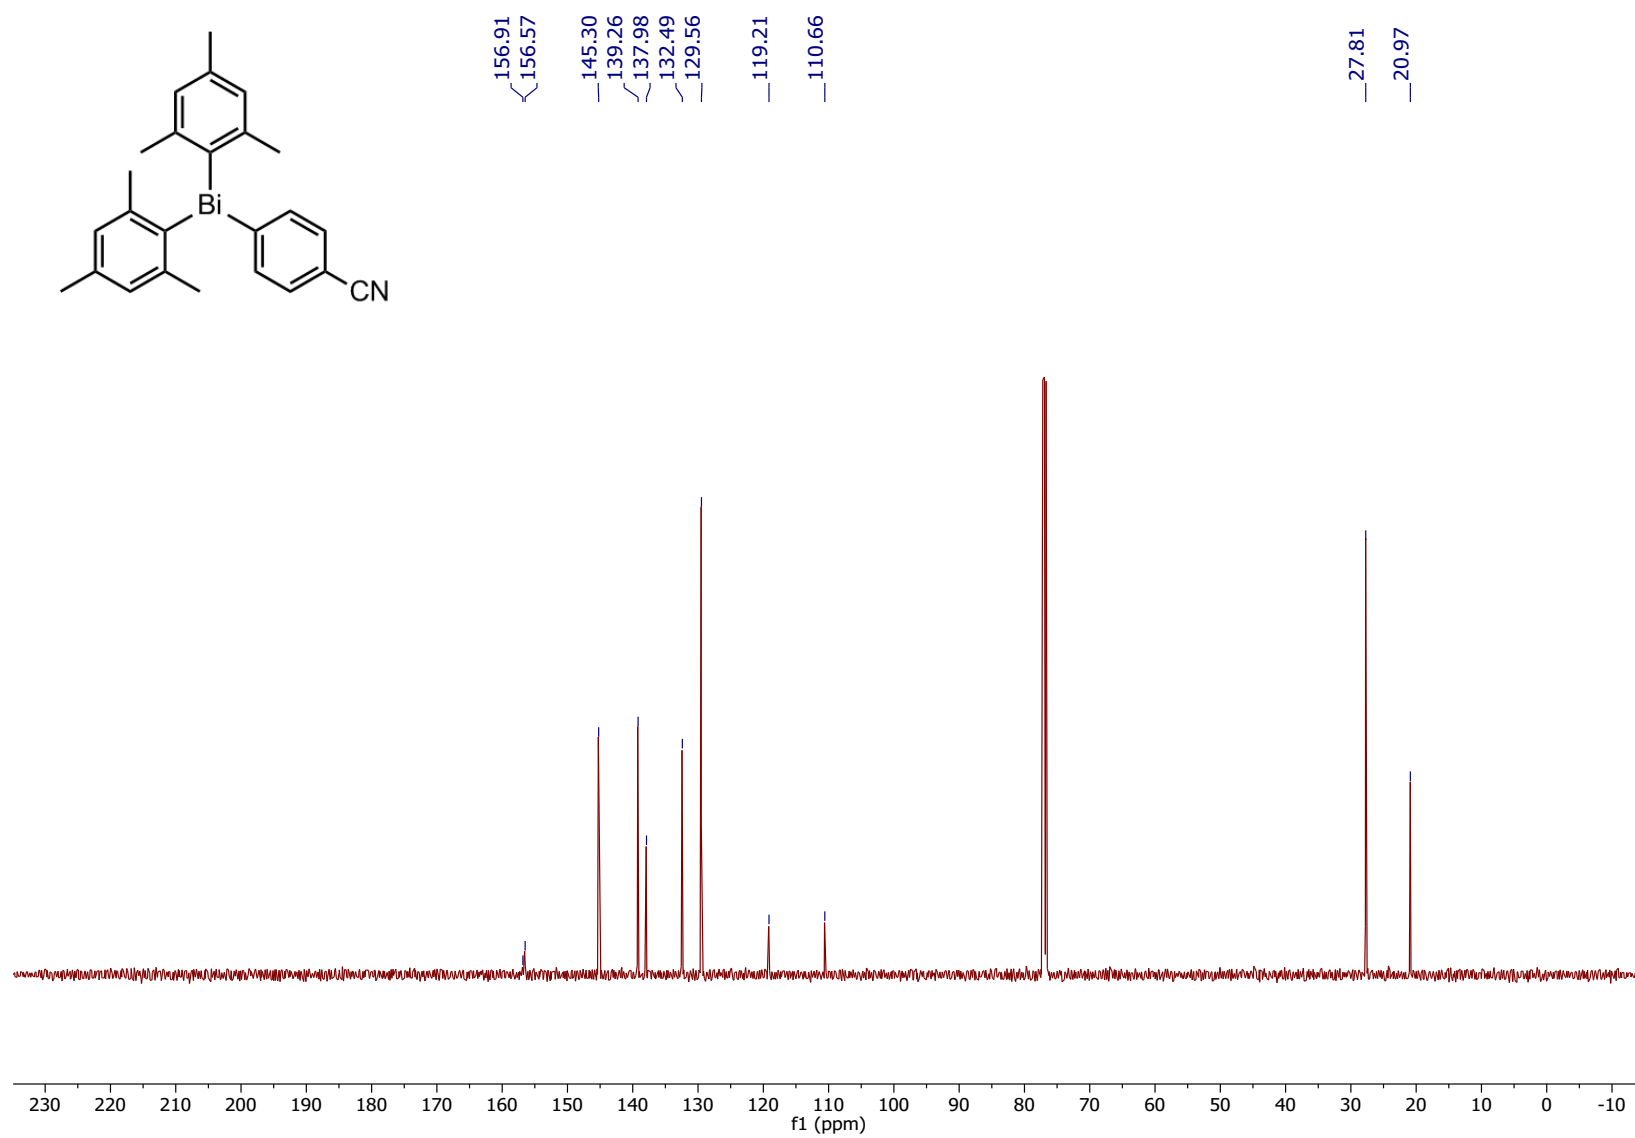

Figure S44.  $^{13}\text{C}$   $\{^1\text{H}\}$  NMR of **1g** in  $\text{CDCl}_3$



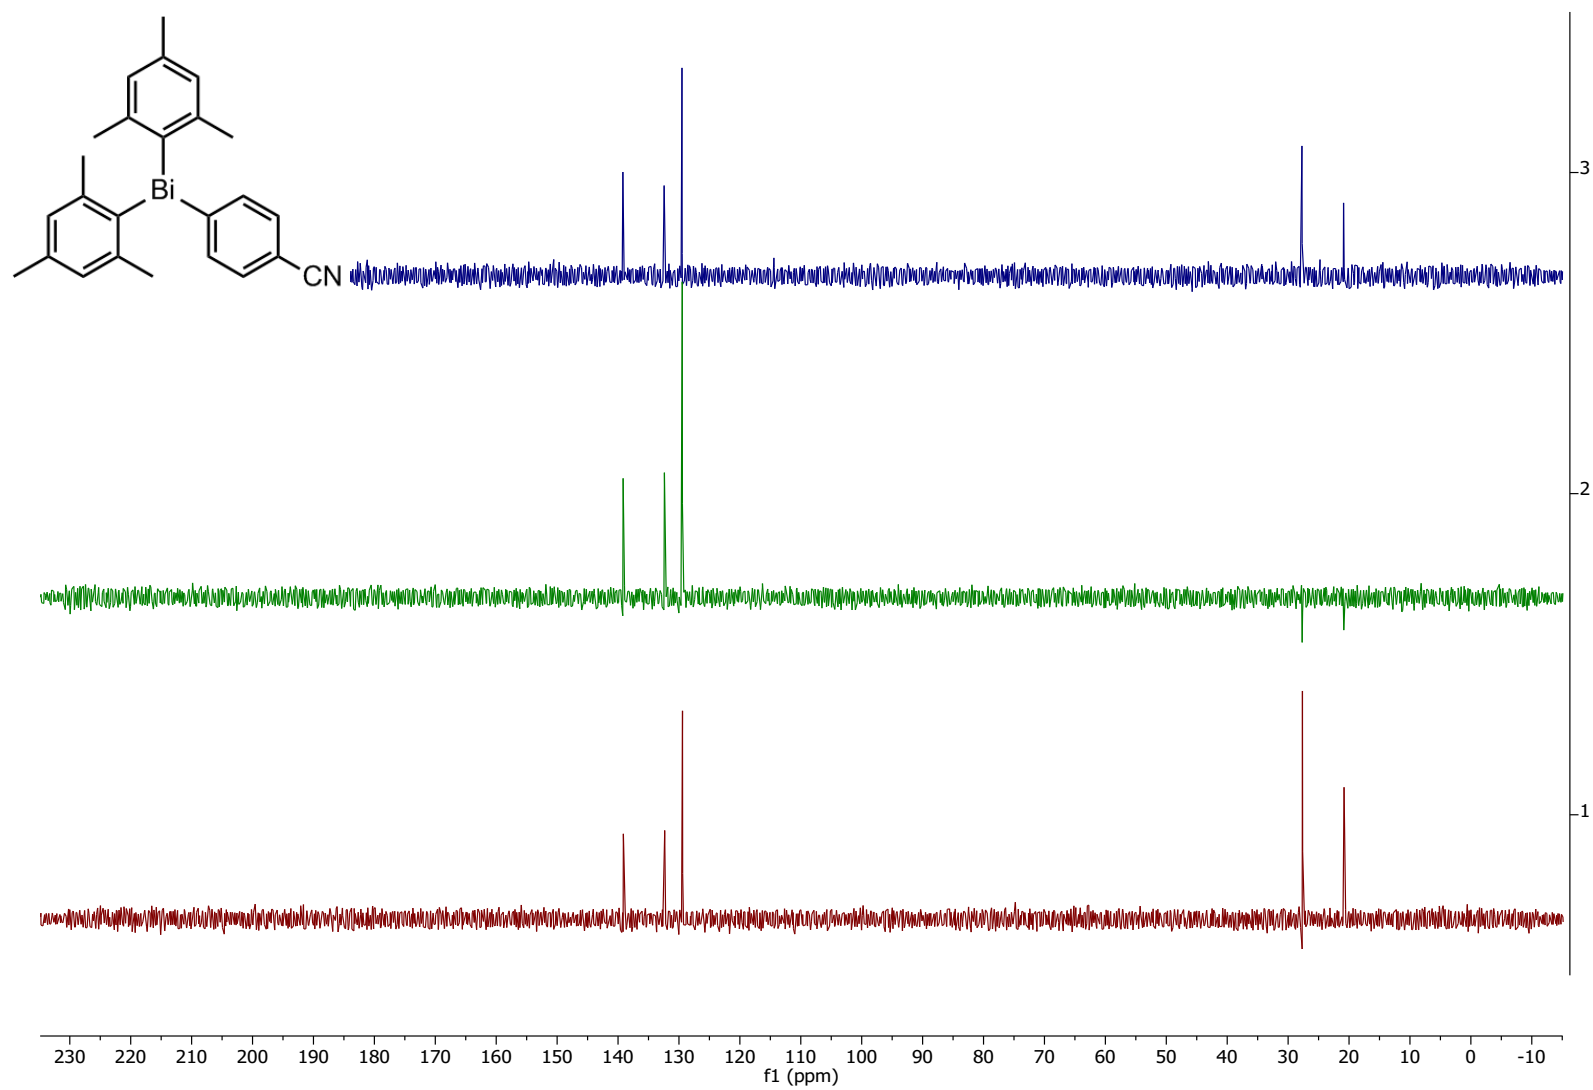

Figure S45. <sup>13</sup>C DEPT of **1g** in CDCl<sub>3</sub>

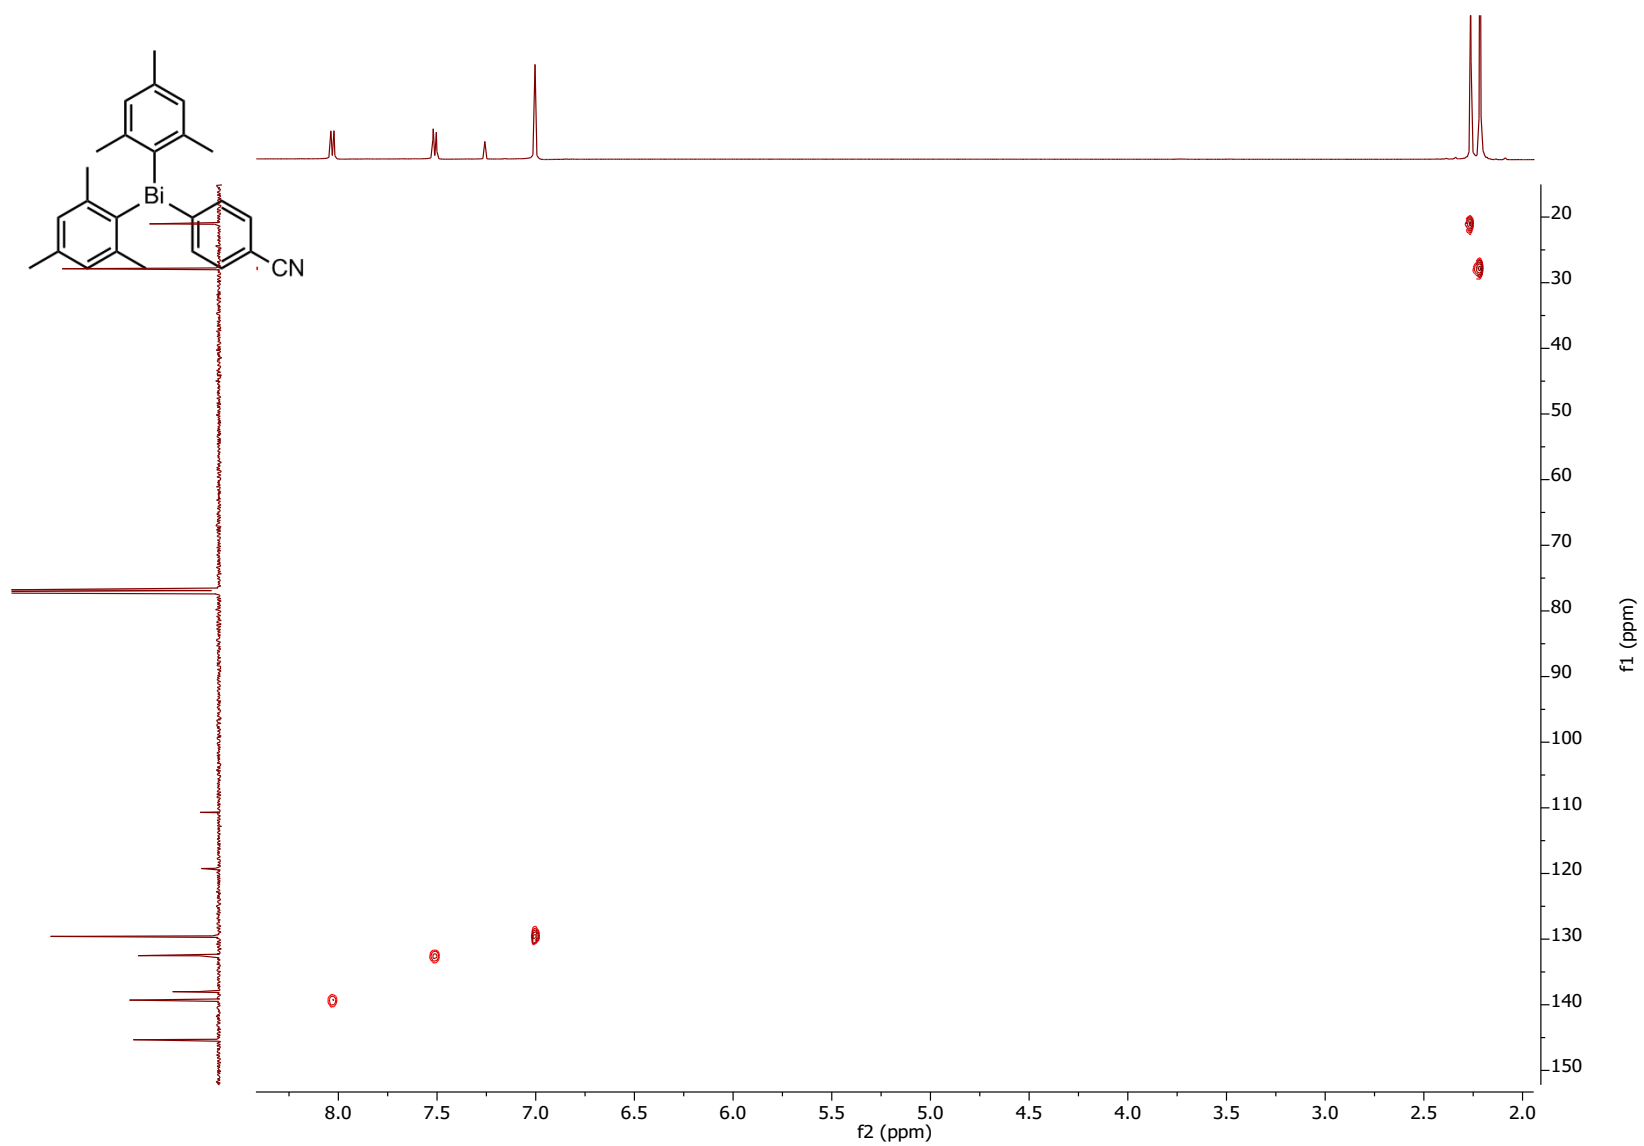

Figure S46. 2D HSQC of **1g** in  $\text{CDCl}_3$

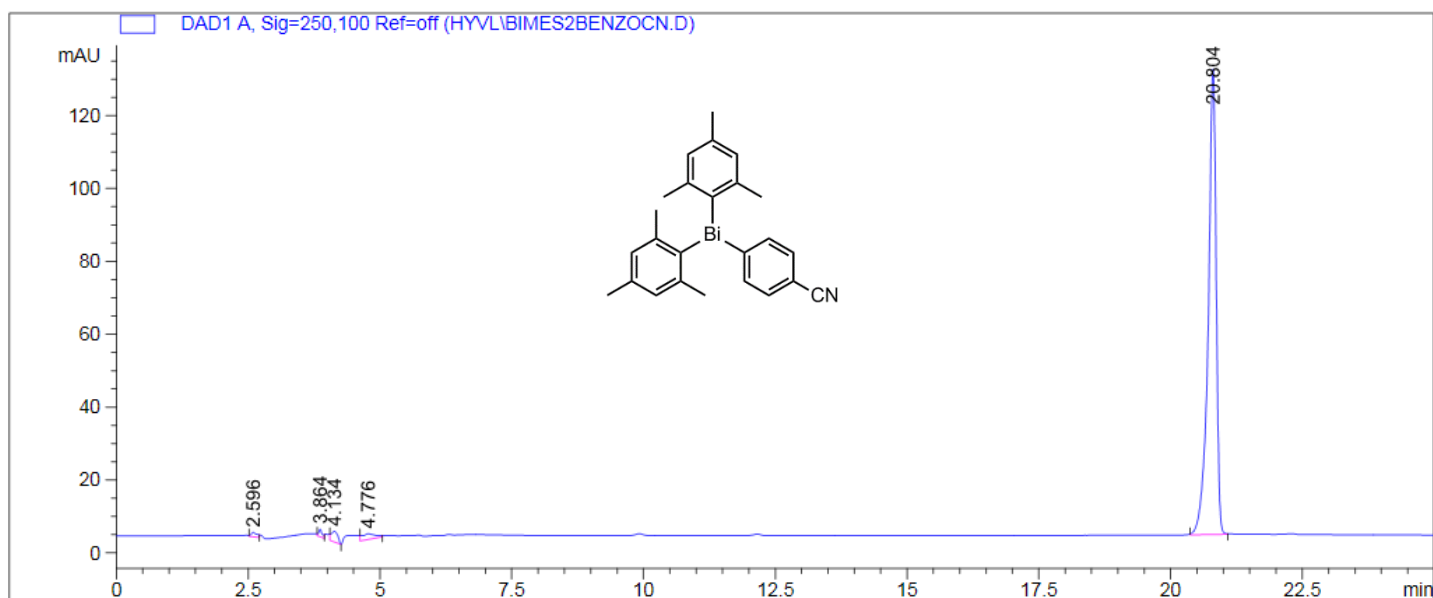

# Area Percent Report

Sorted By : Signal  
Multiplier: : 1.0000  
Dilution: : 1.0000  
Sample Amount: : 20.00000 [ng/ul] (not used in calc.)  
Use Multiplier & Dilution Factor with ISTDs

Signal 1: DAD1 A, Sig=250,100 Ref=off

| Peak # | RetTime [min] | Type | Width [min] | Area [mAU*s] | Height [mAU] | Area %  |
|--------|---------------|------|-------------|--------------|--------------|---------|
| 1      | 2.596         | BB   | 0.1066      | 9.04404      | 1.16519      | 0.6390  |
| 2      | 3.864         | BB   | 0.0664      | 9.94713      | 2.13506      | 0.7029  |
| 3      | 4.134         | BV   | 0.1346      | 24.92050     | 2.94877      | 1.7609  |
| 4      | 4.776         | BB   | 0.2193      | 27.37470     | 1.60261      | 1.9343  |
| 5      | 20.804        | BB   | 0.1566      | 1343.94800   | 127.86018    | 94.9629 |

**Figure S47. HPLC Chromatogram of 1g**

## NMR Spectra and EA Report of Compound 1h

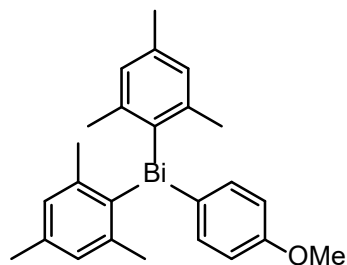

Chemical Formula: BiOC<sub>25</sub>H<sub>29</sub>

Molecular Weight: 554.49

Elemental Analysis: C: 54.15; Bi: 37.69; H: 5.27; O: 2.89

CENTC Elemental Analysis Facility  
University of Rochester  
Rochester, NY 14627 USA  
Email: ealab@chem.rochester.edu

|                |                      |         |               |
|----------------|----------------------|---------|---------------|
| Date of report | 11/1/2019 6:03:25PM  |         |               |
| User ID        | Administrator        |         |               |
| Comments       | TLG_2_131A [Hyvl]    |         |               |
| DATE & TIME    | 11/1/2019 3:14:38 PM | P_ID    | EA LAB        |
| SAMPLE ID      | 19617                | USER ID | Administrator |
| WEIGHT (mg)    | 2.155                | MODE    | CHN           |
|                |                      |         |               |
| CARBON         |                      | 54.098% |               |
| HYDROGEN       |                      | 5.153%  |               |
| NITROGEN       |                      | -.008%  |               |

### Acknowledgment

Analytical data were obtained from the CENTC Elemental Analysis Facility at the University of Rochester, funded by NSF CHE-0650456.

### Instrumentation

Microanalysis samples were weighed with a PerkinElmer Model AD6000 Autobalance and their compositions were determined with a PerkinElmer 2400 Series II Analyzer.

**Figure S48.** EA report for **1h**

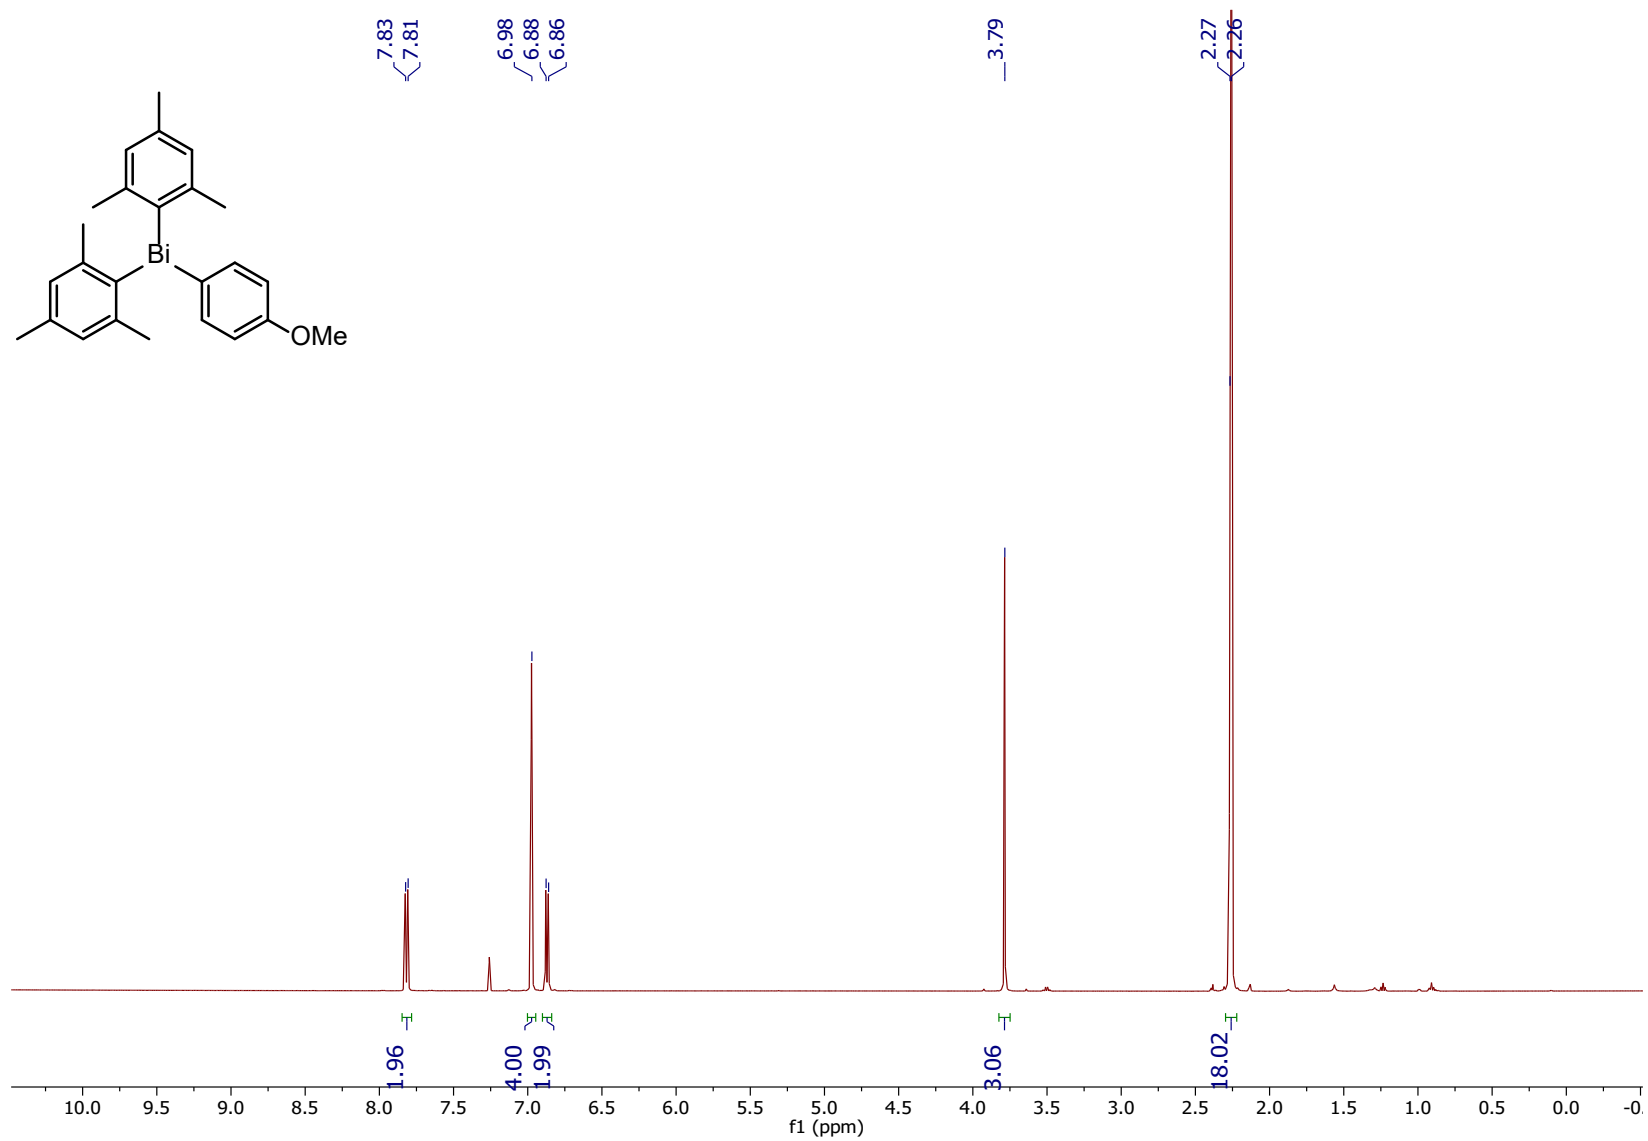

Figure S49. <sup>1</sup>H NMR of **1h** in CDCl<sub>3</sub>

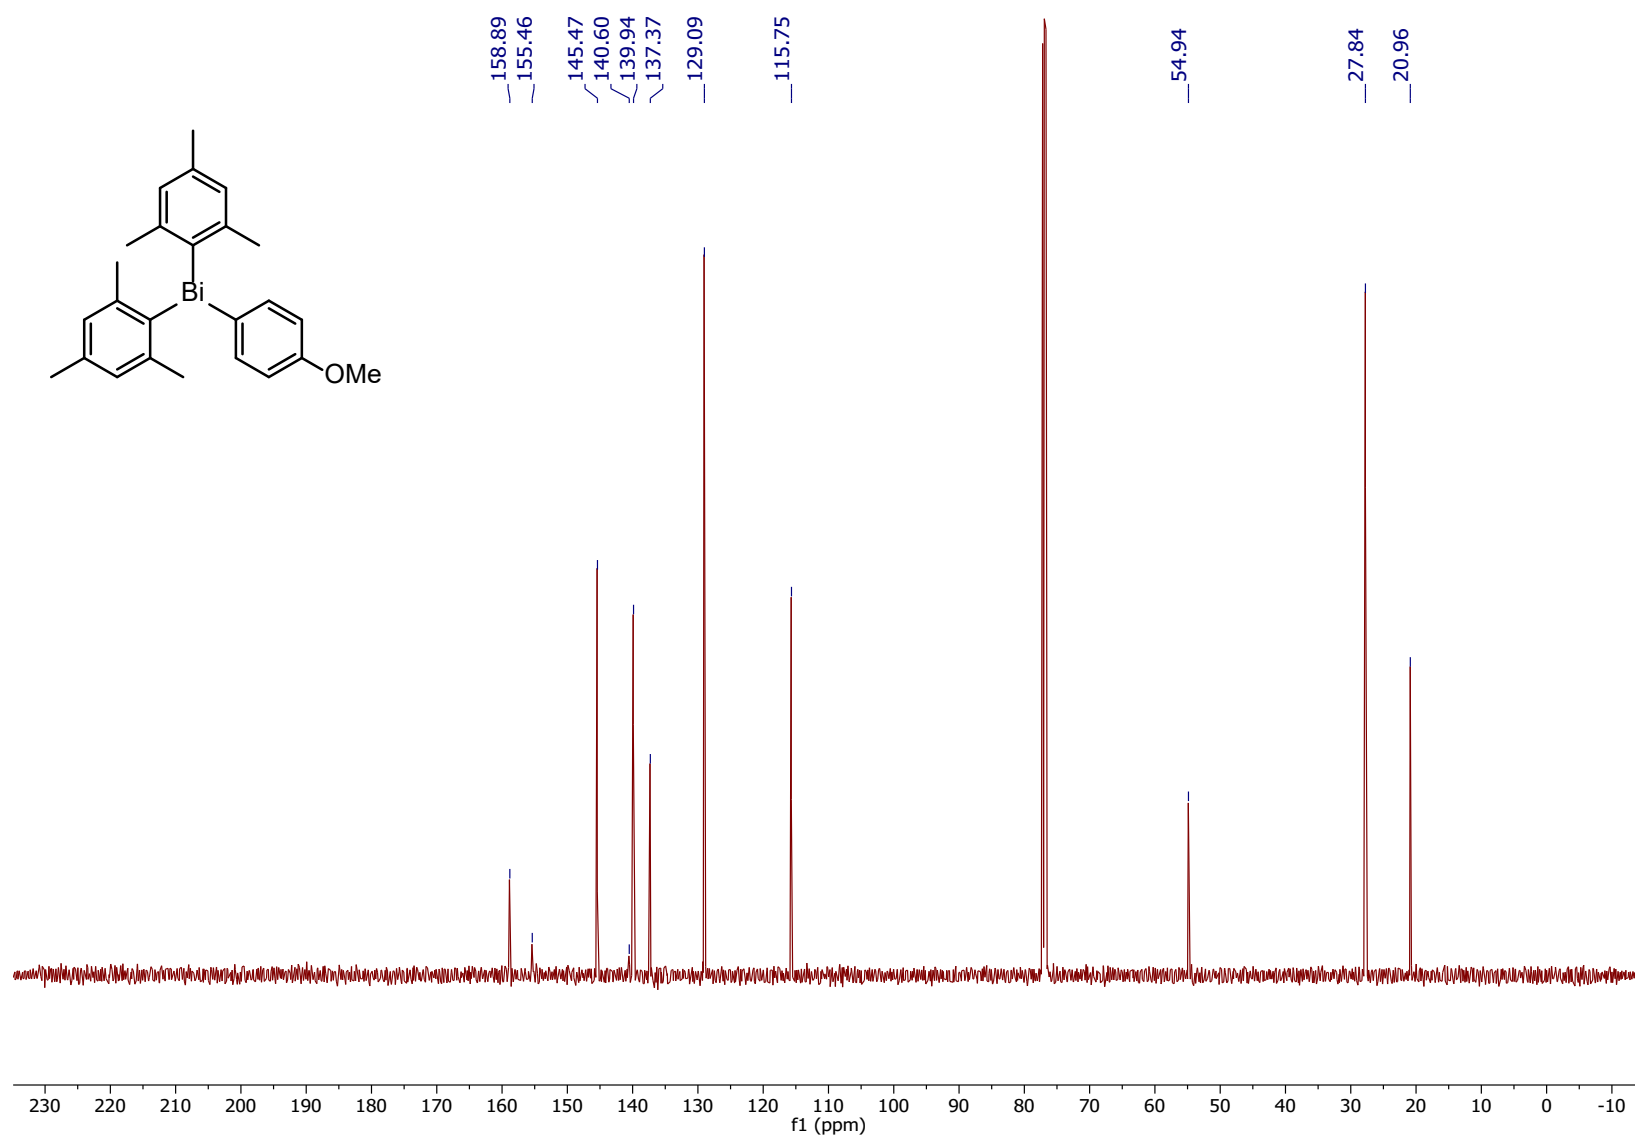

Figure S50.  $^{13}\text{C}$   $\{^1\text{H}\}$  NMR of **1h** in  $\text{CDCl}_3$

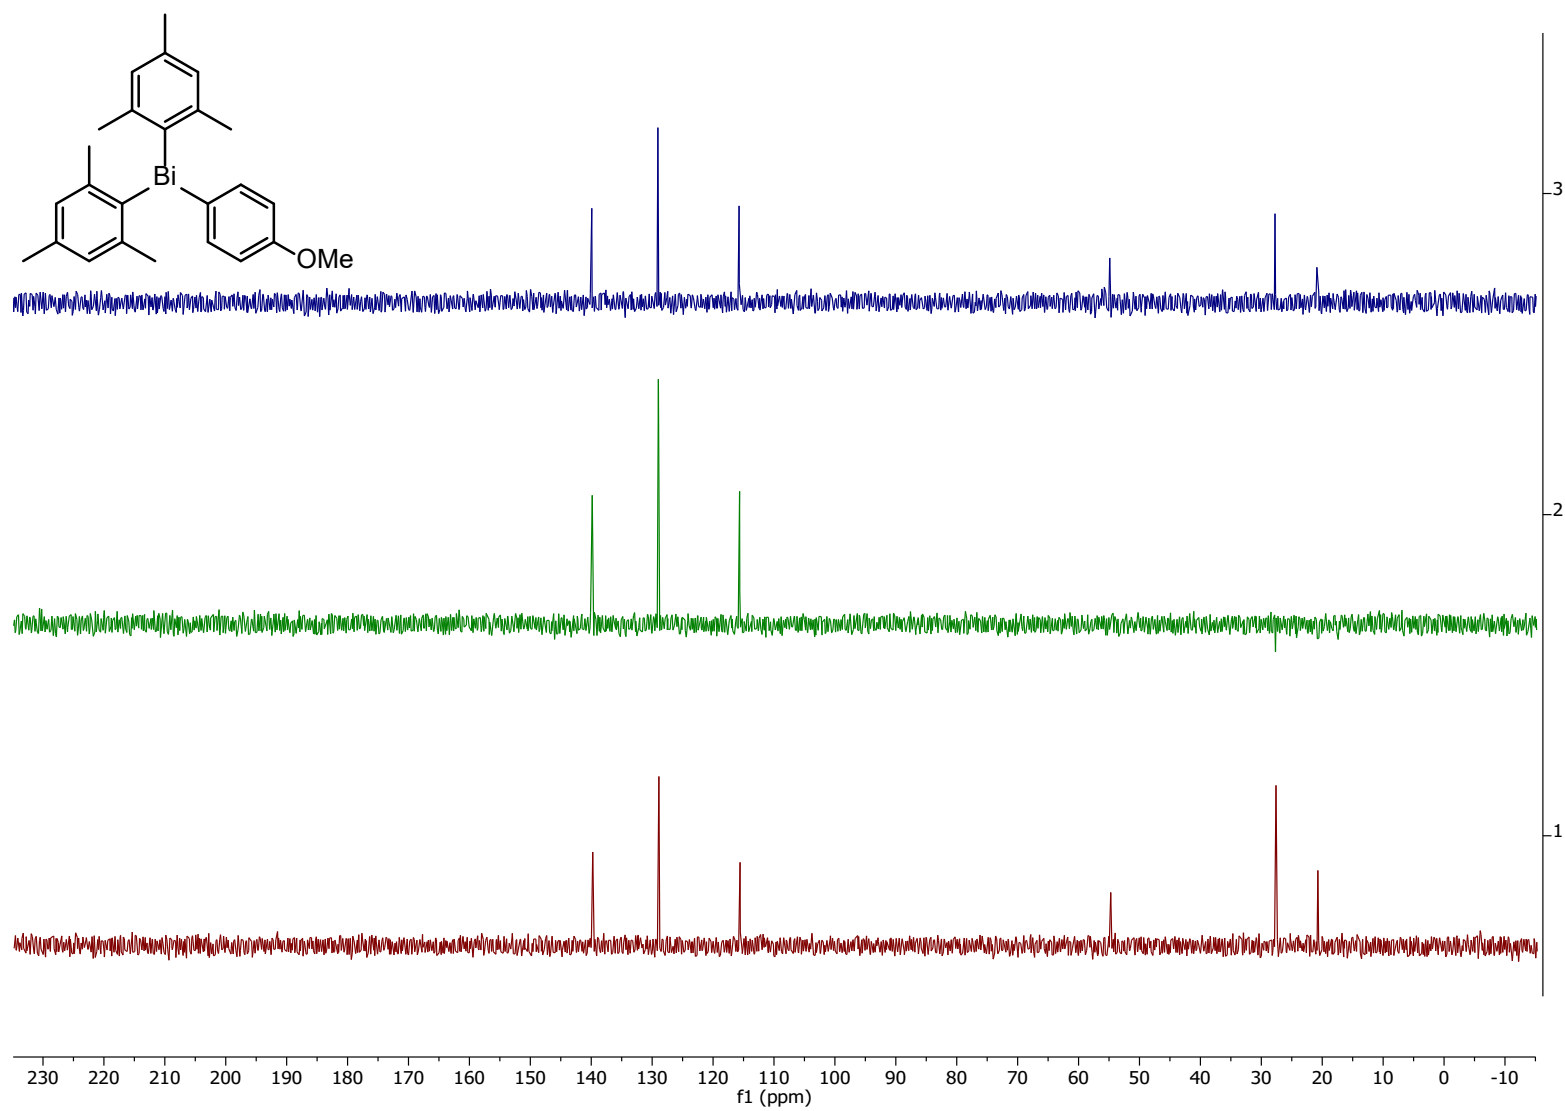

Figure S51.  $^{13}\text{C}$  DEPT of **1h** in  $\text{CDCl}_3$

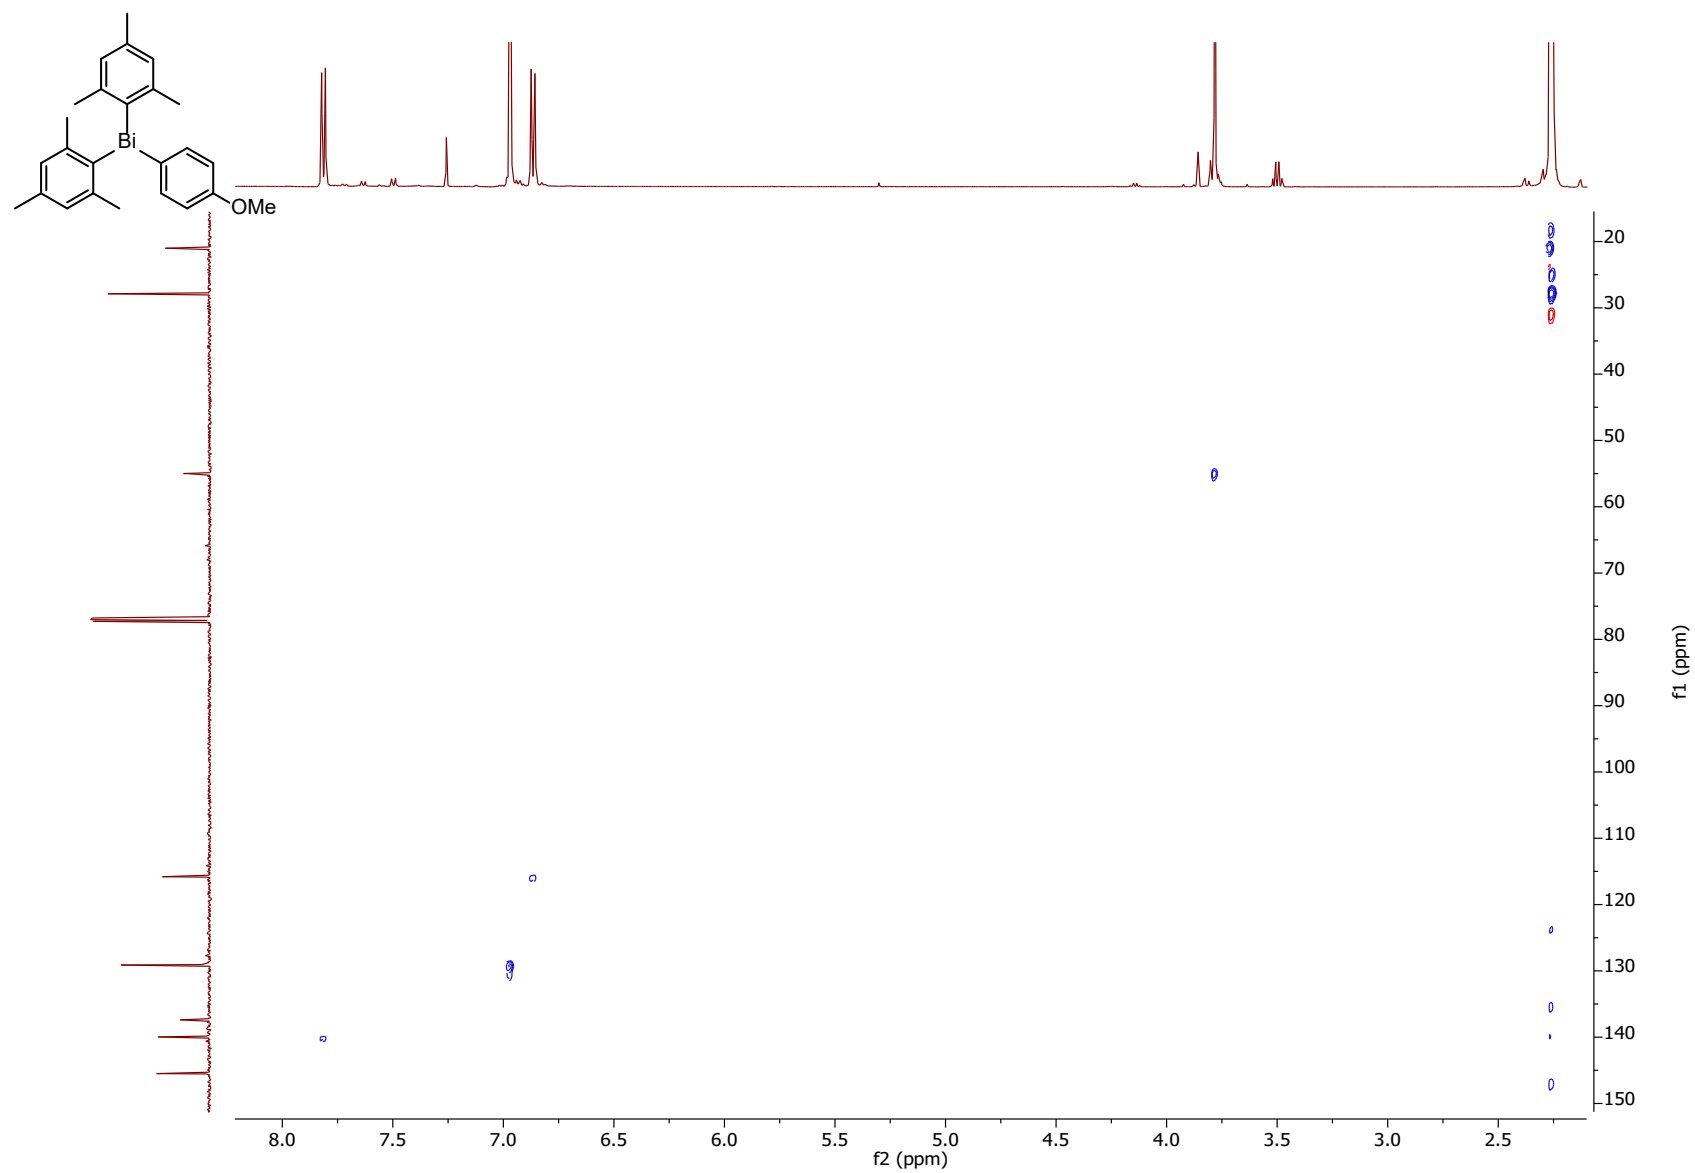

**Figure S52.** 2D HSQC of **1h** in  $\text{CDCl}_3$



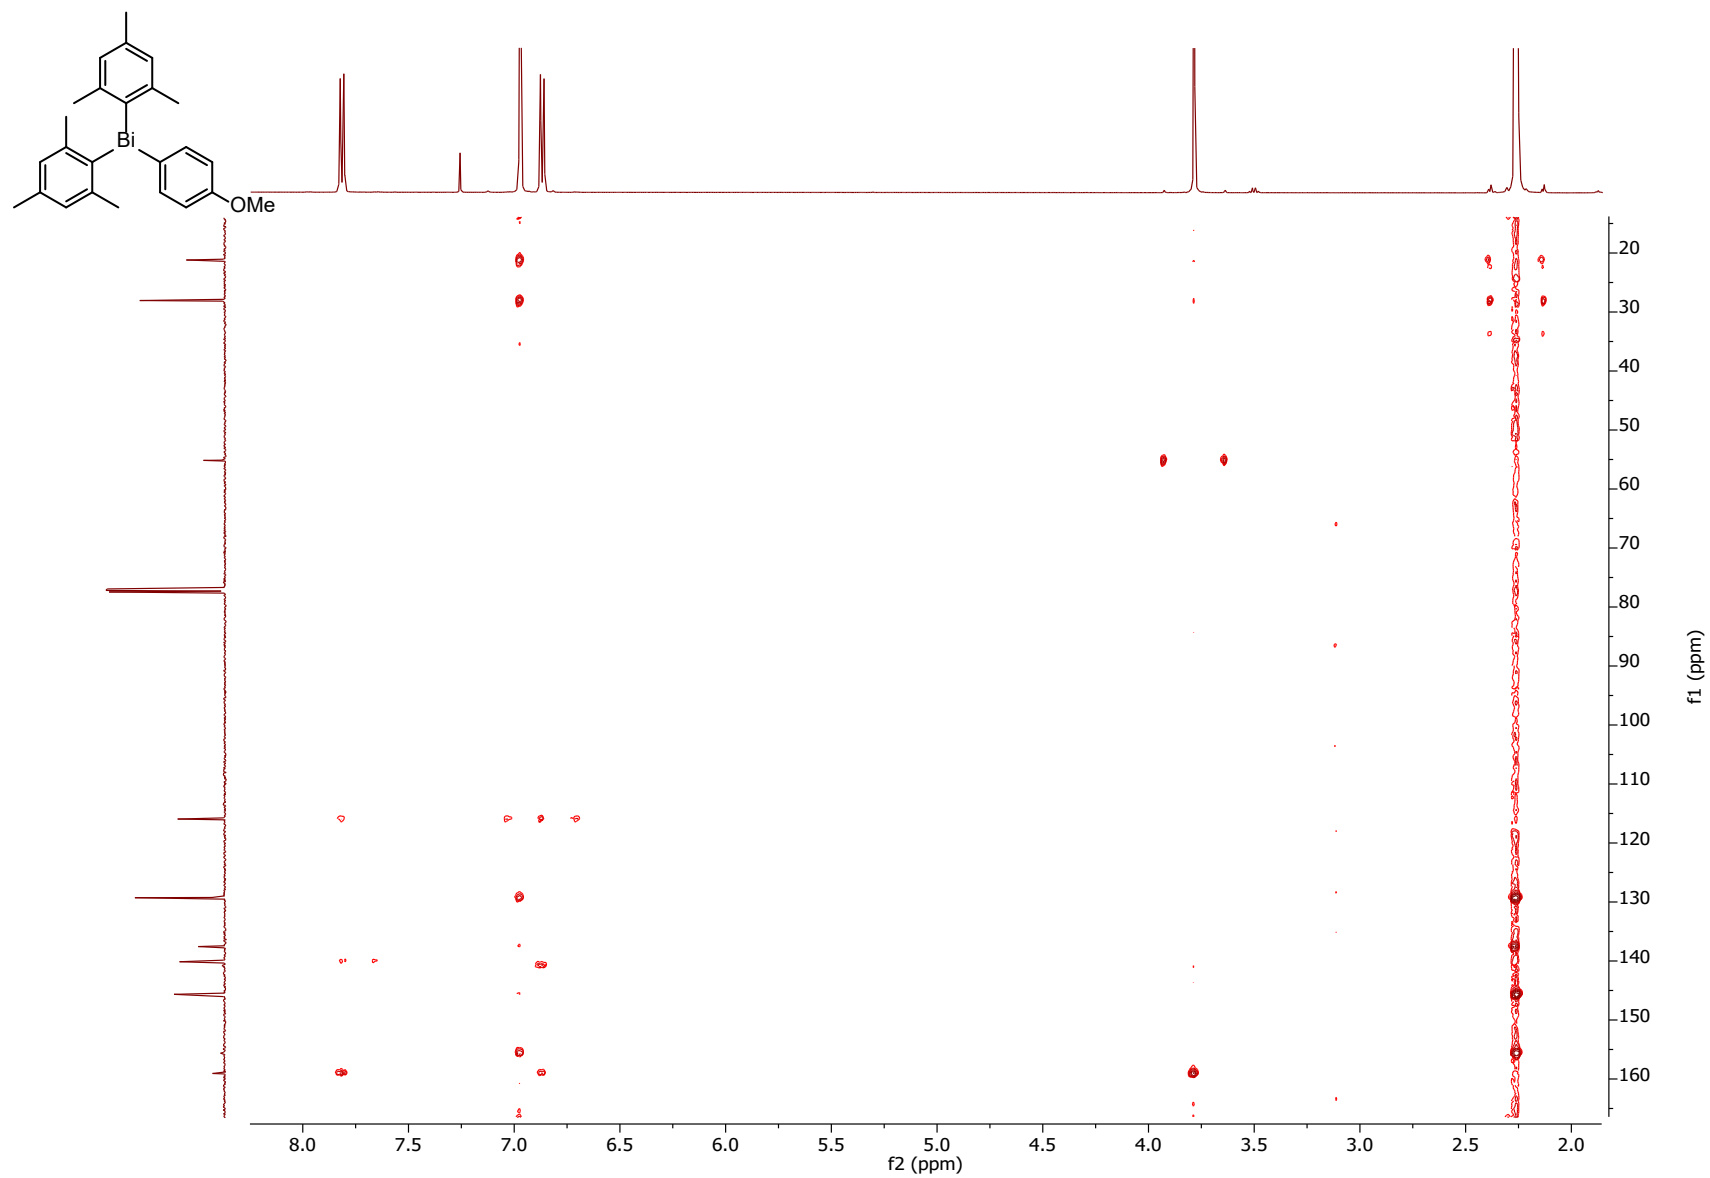

Figure S53. 2D HMBC of **1h** in  $\text{CDCl}_3$

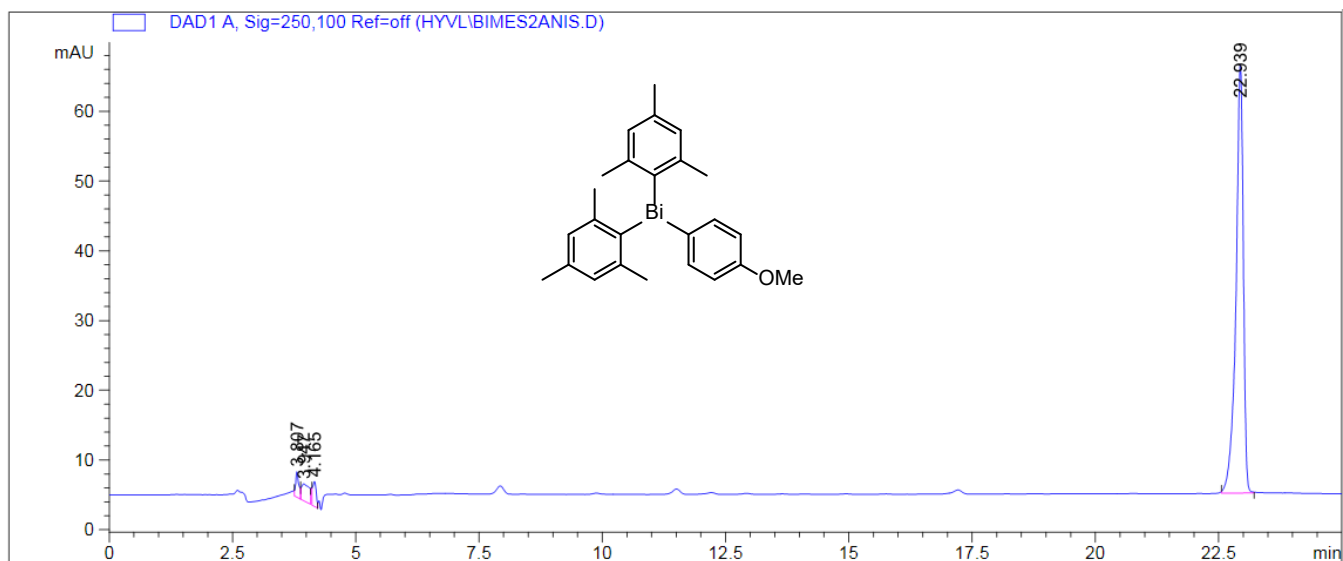

# Area Percent Report

```

Sorted By      :      Signal
Multiplier:    :      1.0000
Dilution:      :      1.0000
Sample Amount: :      20.00000 [ng/ul]   (not used in calc.)
Use Multiplier & Dilution Factor with ISTDs
  
```

Signal 1: DAD1 A, Sig=250,100 Ref=off

| Peak # | RetTime [min] | Type | Width [min] | Area [mAU*s] | Height [mAU] | Area %  |
|--------|---------------|------|-------------|--------------|--------------|---------|
| 1      | 3.807         | BV   | 0.0653      | 16.86088     | 3.68864      | 2.4013  |
| 2      | 3.947         | VB   | 0.1545      | 27.97085     | 2.42597      | 3.9836  |
| 3      | 4.165         | BV   | 0.0754      | 18.10877     | 3.55799      | 2.5791  |
| 4      | 22.939        | BB   | 0.1554      | 639.20490    | 61.44005     | 91.0360 |

**Figure S54.** HPLC Chromatogram of **1h**

## NMR Spectra and EA Report of Compound 1i

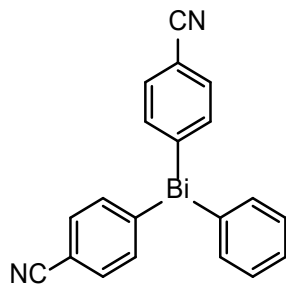

Chemical Formula:  $\text{BiN}_2\text{C}_{20}\text{H}_{13}$

Molecular Weight: 490.32

Elemental Analysis: C: 48.99; Bi: 42.62; H: 2.67; N: 5.71

CENTC Elemental Analysis Facility  
University of Rochester  
Rochester, NY 14627 USA  
Email: ealab@chem.rochester.edu

|                |                     |
|----------------|---------------------|
| Date of report | 5/31/2019 4:52:39PM |
| User ID        | Administrator       |
| Comments       | TLG_2_16 [Hym]      |

|             |                      |         |               |
|-------------|----------------------|---------|---------------|
| DATE & TIME | 5/31/2019 2:58:32 PM | P_ID    | EA LAB        |
| SAMPLE ID   | 19332                | USER ID | Administrator |
| WEIGHT (mg) | 2.214                | MODE    | CHN           |
|             |                      |         |               |
| CARBON      |                      | 49.146% |               |
| HYDROGEN    |                      | 2.616%  |               |
| NITROGEN    |                      | 5.870%  |               |

### Acknowledgment

Analytical data were obtained from the CENTC Elemental Analysis Facility at the University of Rochester, funded by NSF CHE-0650456.

### Instrumentation

Microanalysis samples were weighed with a PerkinElmer Model AD6000 Autobalance and their compositions were determined with a PerkinElmer 2400 Series II Analyzer.

Figure S55. EA report for 1i

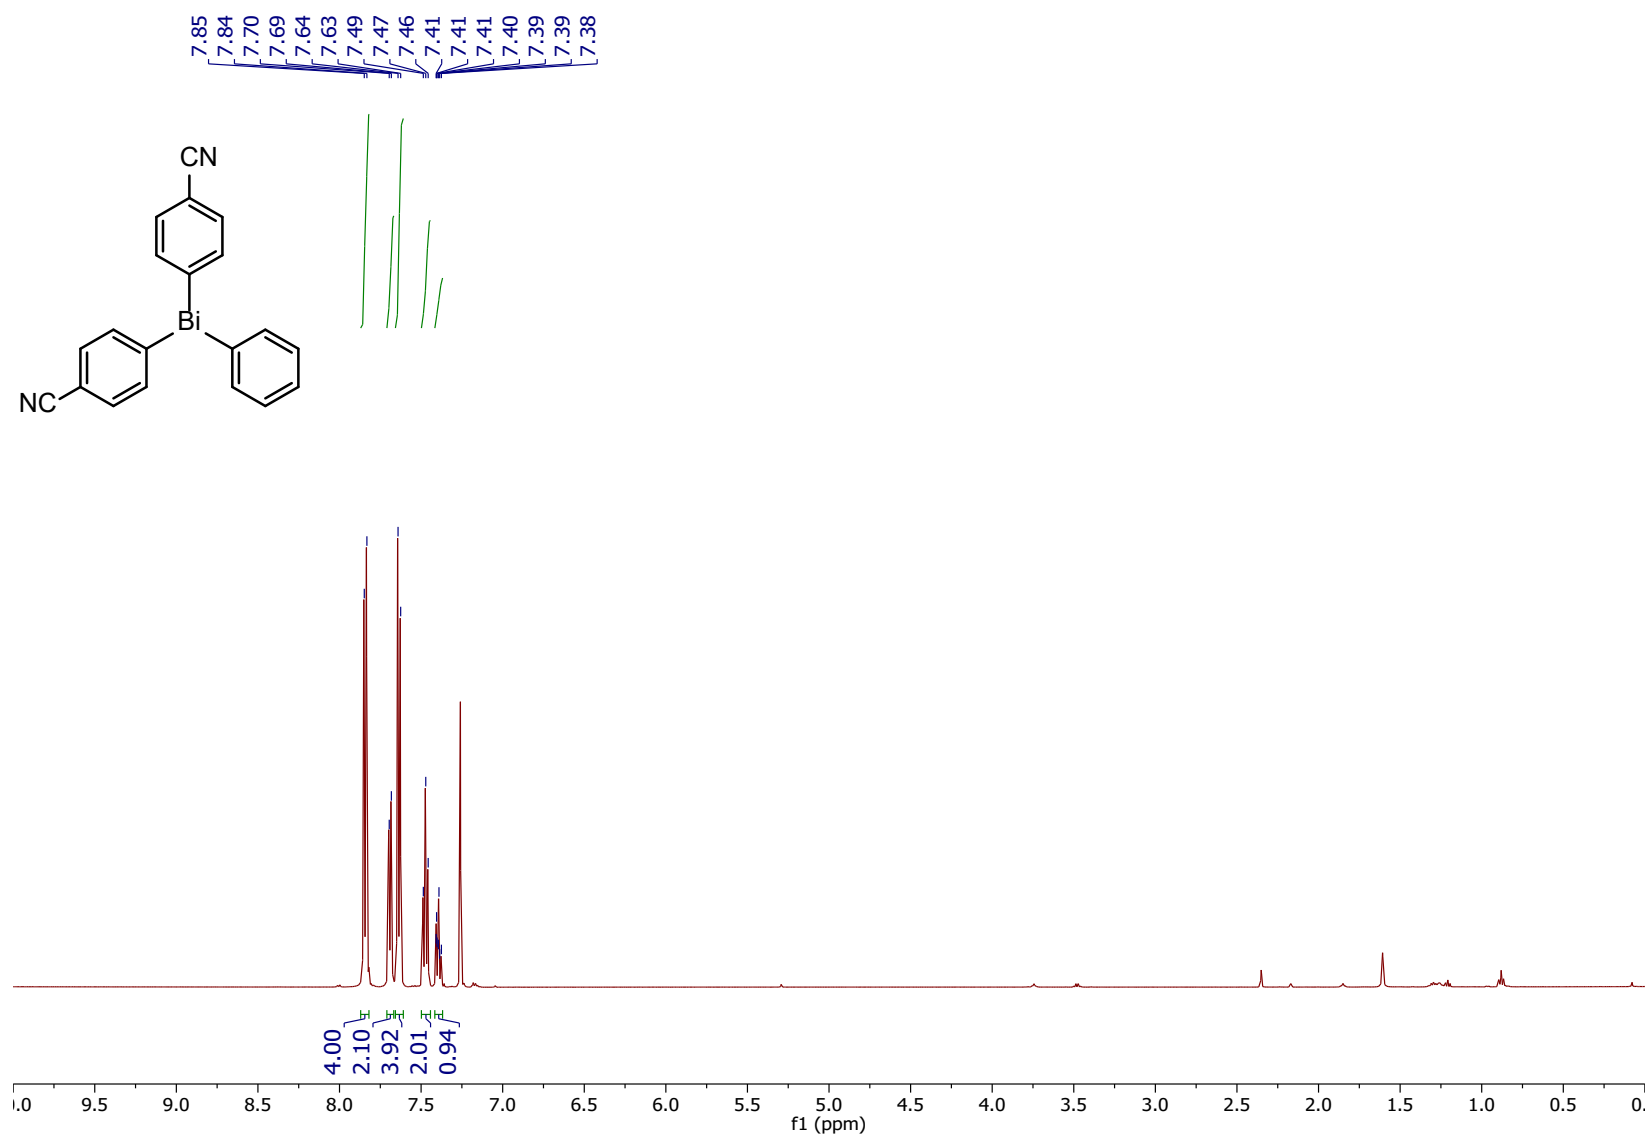

Figure S56.  $^1\text{H}$  NMR of **1i** in CDCl<sub>3</sub>

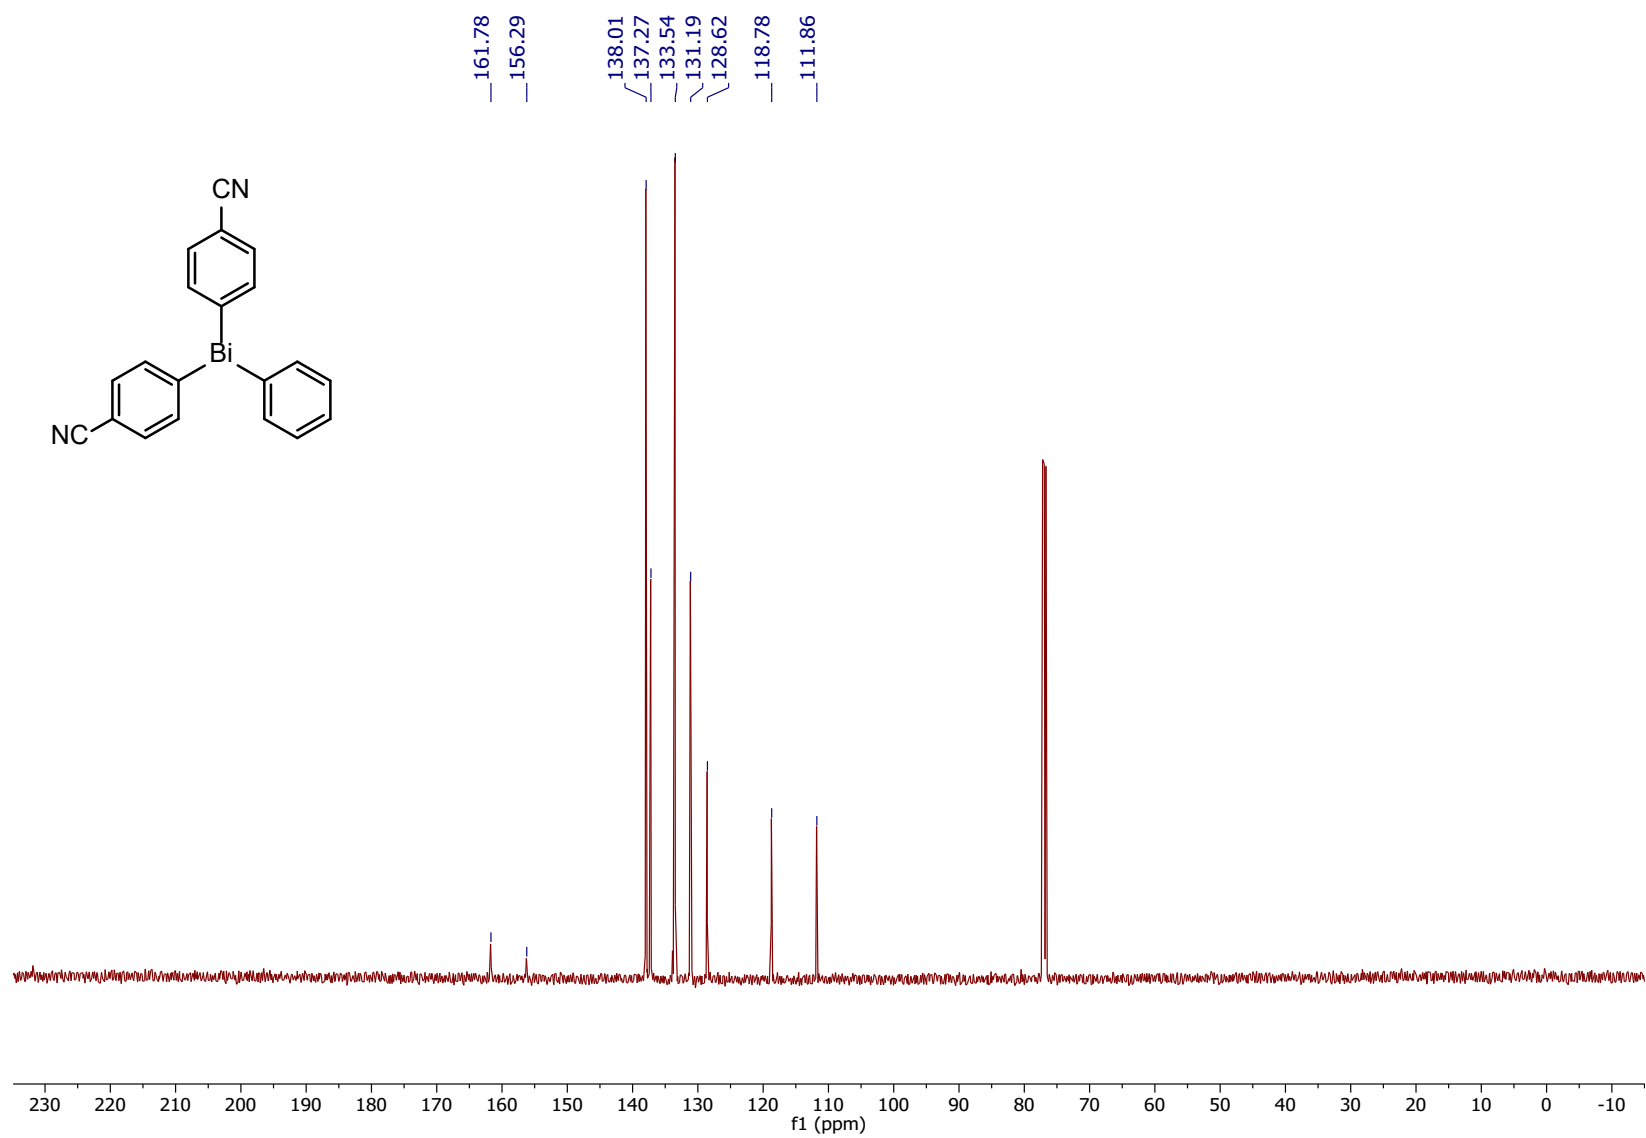

Figure S57.  $^{13}\text{C}$   $\{^1\text{H}\}$  NMR of **1i** in  $\text{CDCl}_3$

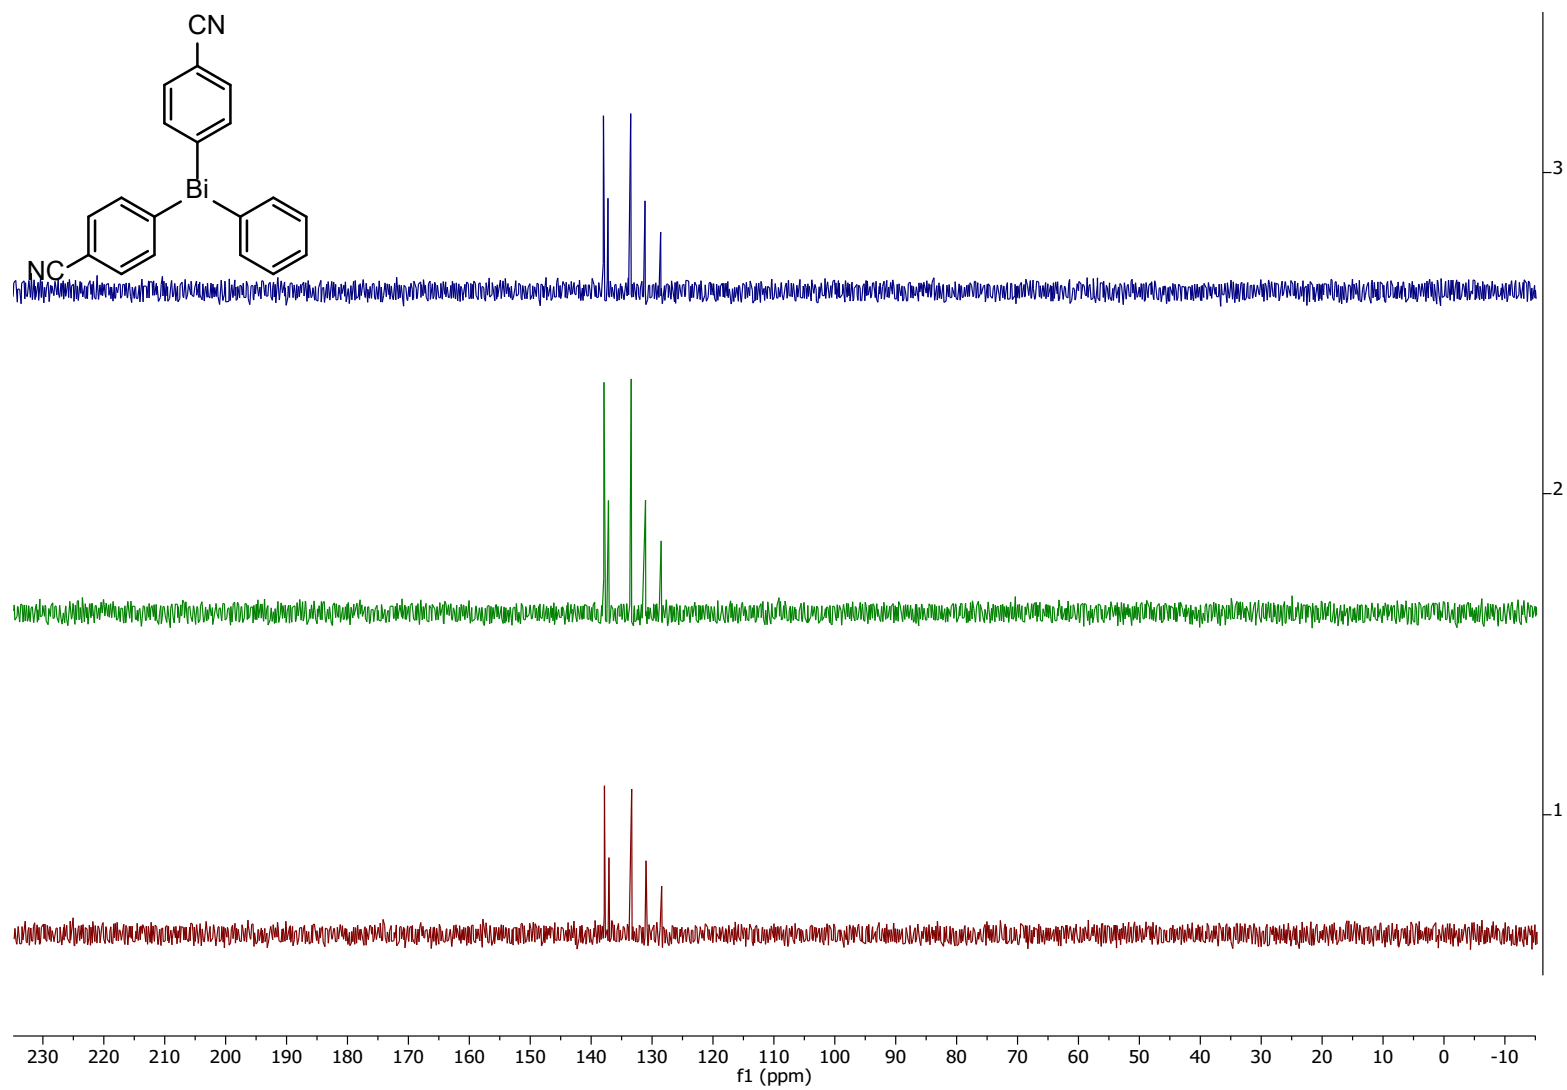

Figure S58.  $^{13}\text{C}$  DEPT of **1i** in  $\text{CDCl}_3$

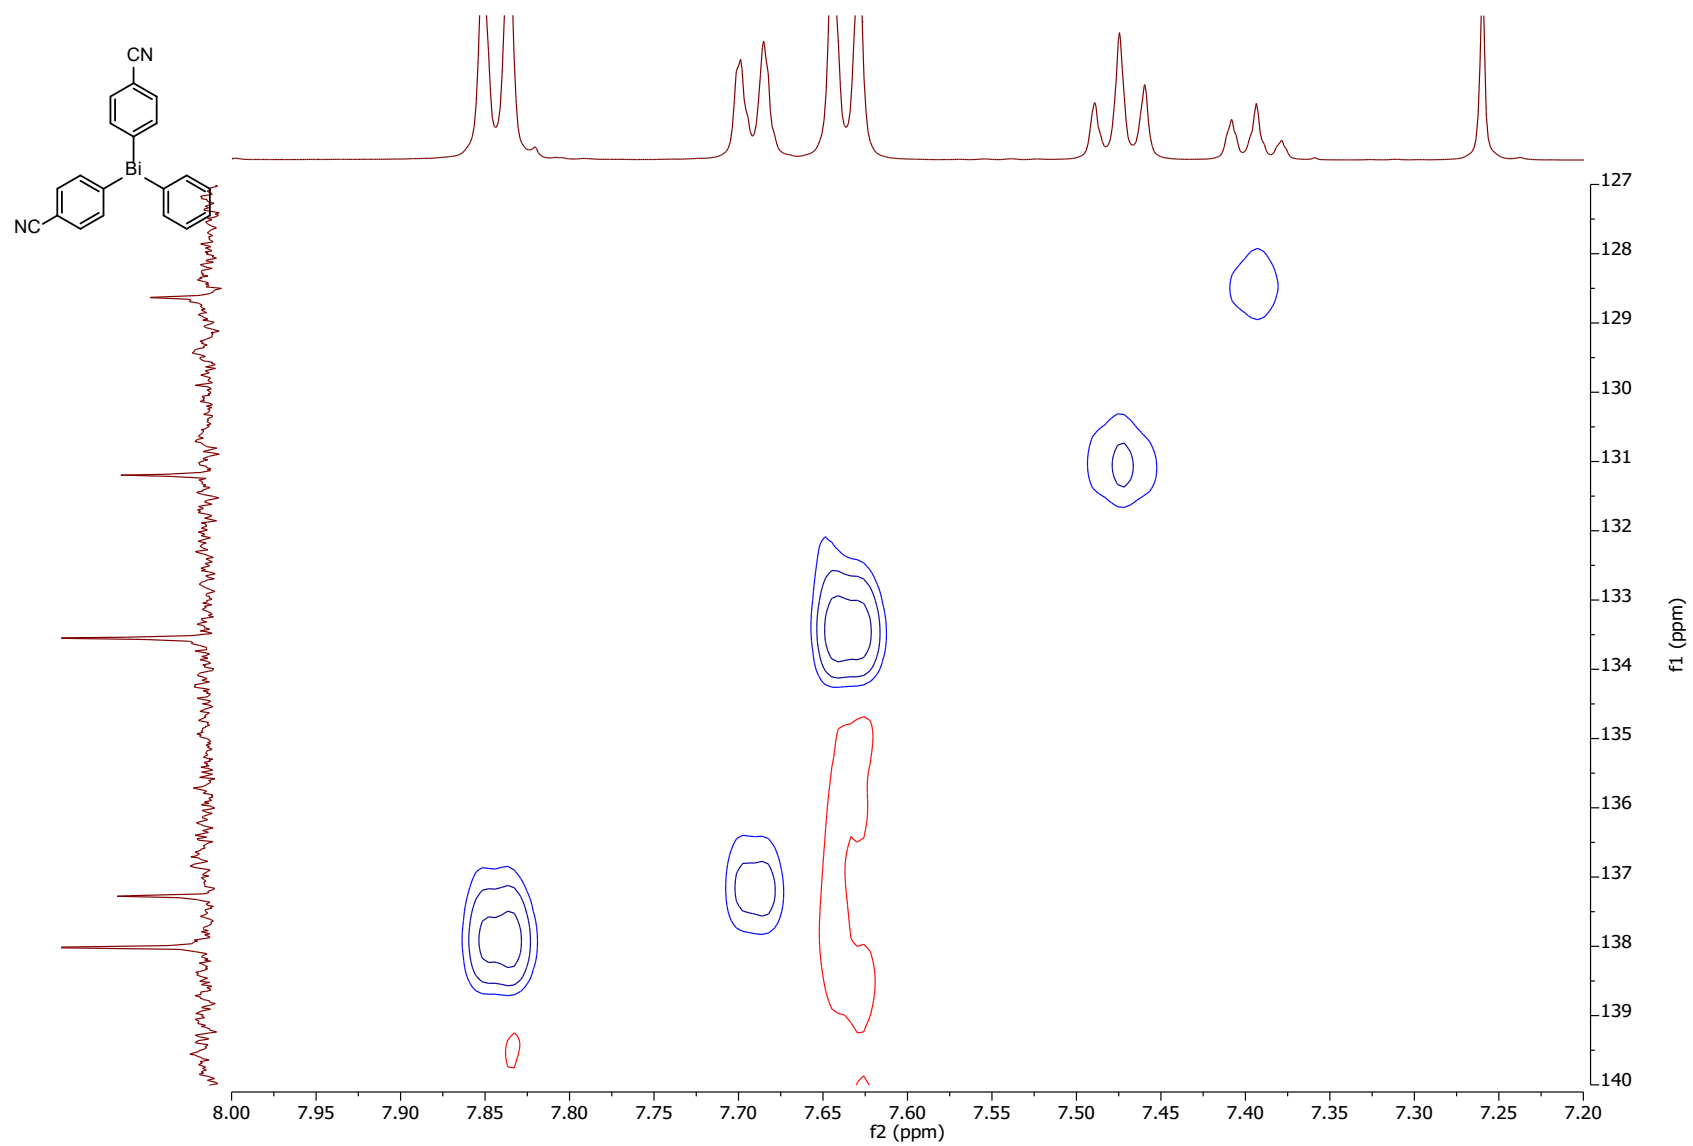

Figure S59. 2D HSQC of **1i** in  $\text{CDCl}_3$

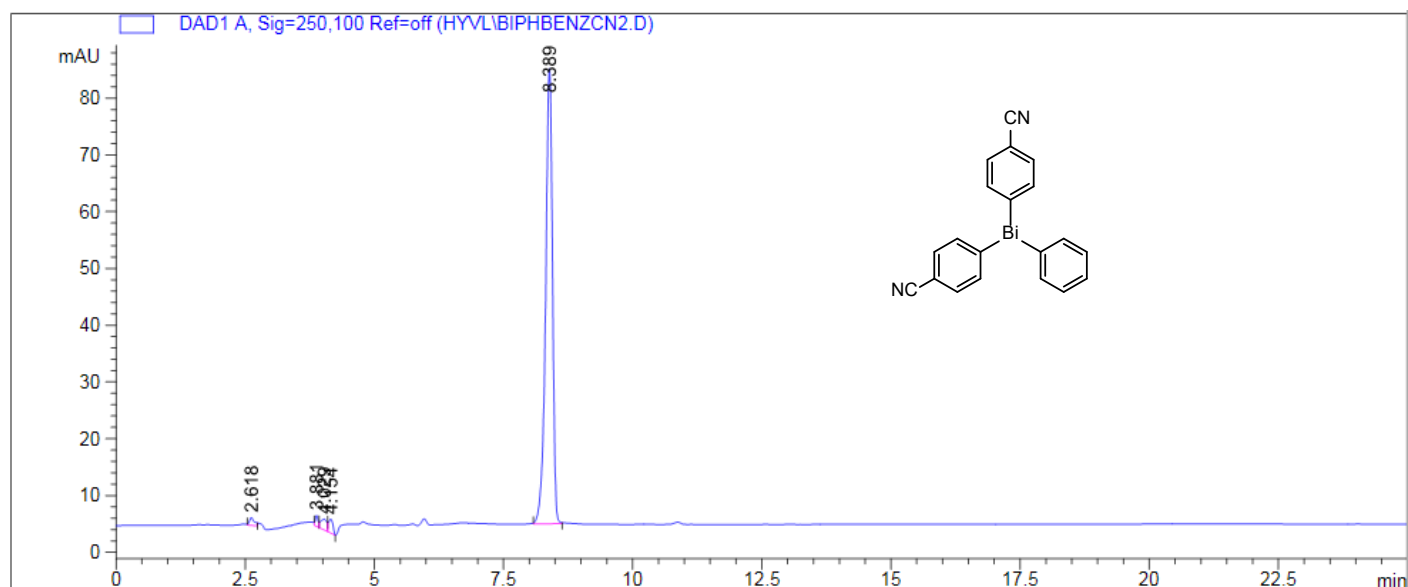

Area Percent Report

Sorted By : Signal  
Multiplier: : 1.0000  
Dilution: : 1.0000  
Sample Amount: : 20.00000 [ng/ul] (not used in calc.)  
Use Multiplier & Dilution Factor with ISTDs

Signal 1: DAD1 A, Sig=250,100 Ref=off

| Peak # | RetTime [min] | Type | Width [min] | Area [mAU*s] | Height [mAU] | Area %  |
|--------|---------------|------|-------------|--------------|--------------|---------|
| 1      | 2.618         | BB   | 0.0923      | 9.03760      | 1.38157      | 1.1502  |
| 2      | 3.881         | BV   | 0.0581      | 7.41773      | 1.96129      | 0.9440  |
| 3      | 4.029         | VV   | 0.1099      | 15.81809     | 1.92457      | 2.0131  |
| 4      | 4.154         | VV   | 0.0928      | 14.38671     | 2.43910      | 1.8310  |
| 5      | 8.389         | BB   | 0.1415      | 739.08337    | 80.22154     | 94.0617 |

Figure S60. HPLC Chromatogram of **1i**



## NMR Spectra and EA Report of Compound 1j

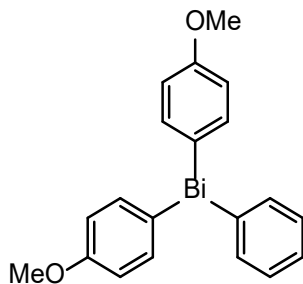

Chemical Formula:  $\text{BiO}_2\text{C}_{20}\text{H}_{19}$

Molecular Weight: 500.35

Elemental Analysis: C: 48.01; Bi: 41.77; H: 3.83; O: 6.40

CENTC Elemental Analysis Facility  
University of Rochester  
Rochester, NY 14627 USA  
Email: ealab@chem.rochester.edu

|                       |                       |         |               |
|-----------------------|-----------------------|---------|---------------|
| <b>Date of report</b> | 5/10/2019 2:30:14PM   |         |               |
| <b>User ID</b>        | Administrator         |         |               |
| <b>Comments</b>       | TLG_1_161 [Hvvl]      |         |               |
| DATE & TIME           | 5/10/2019 11:45:40 AM | P_ID    | EA LAB        |
| SAMPLE ID             | 19288                 | USER ID | Administrator |
| WEIGHT (mg)           | 2.087                 | MODE    | CHN           |
|                       |                       |         |               |
| CARBON                |                       | 48.237% |               |
| HYDROGEN              |                       | 3.656%  |               |
| NITROGEN              |                       | -.008%  |               |

### Acknowledgment

Analytical data were obtained from the CENTC Elemental Analysis Facility at the University of Rochester, funded by NSF CHE-0650456.

### Instrumentation

Microanalysis samples were weighed with a PerkinElmer Model AD6000 Autobalance and their compositions were determined with a PerkinElmer 2400 Series II Analyzer.

**Figure S61.** EA report for 1j

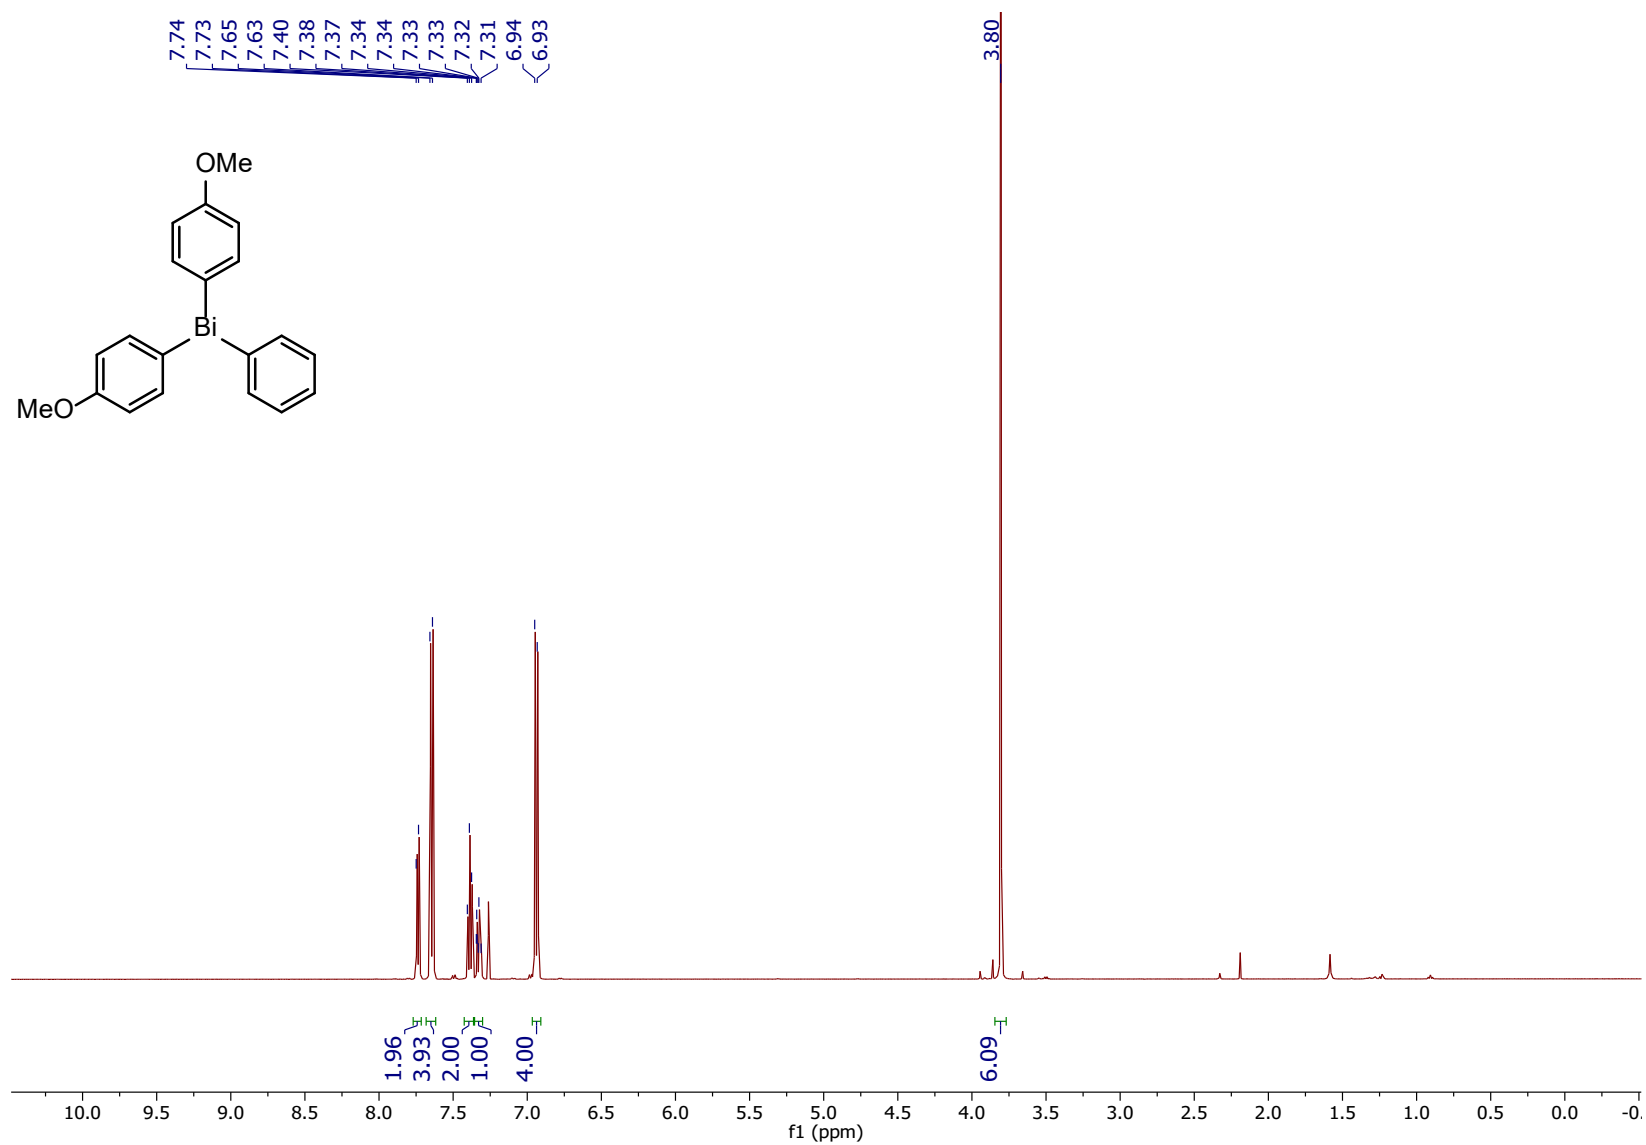

Figure S62.  $^1\text{H}$  NMR of **1j** in CDCl<sub>3</sub>

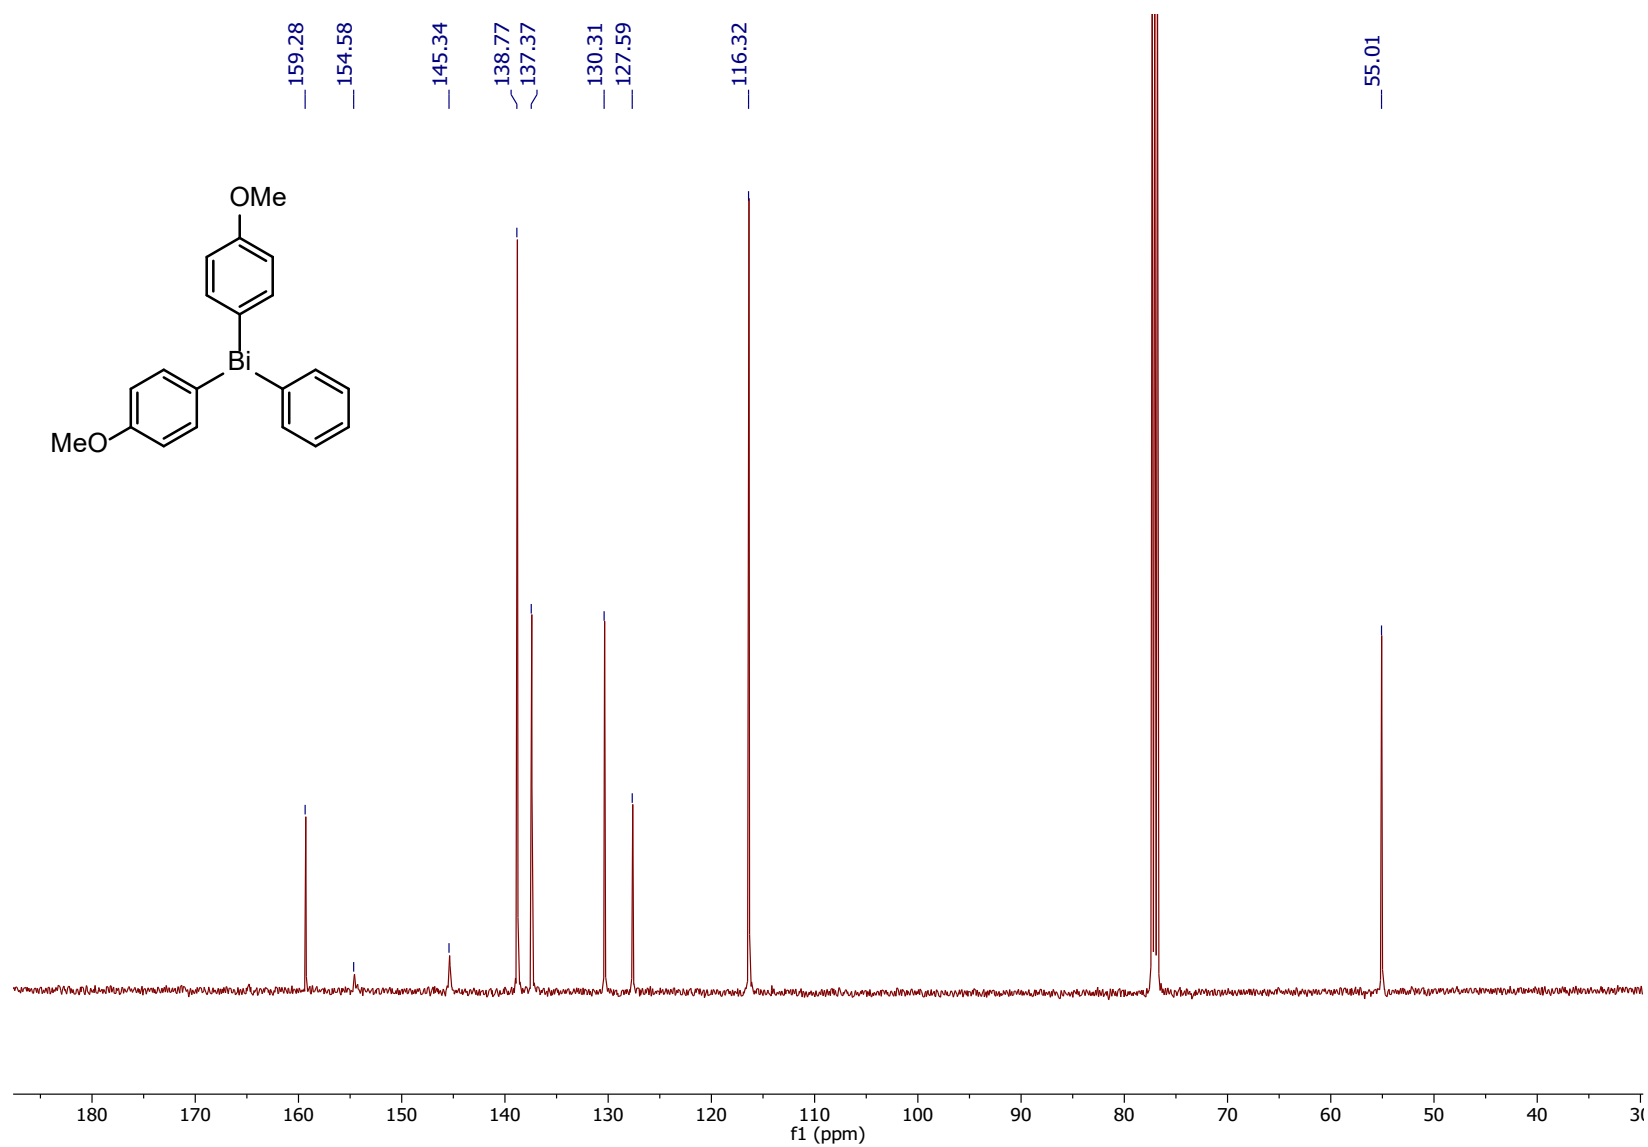

Figure S63.  $^{13}\text{C}$   $\{^1\text{H}\}$  NMR of **1j** in  $\text{CDCl}_3$

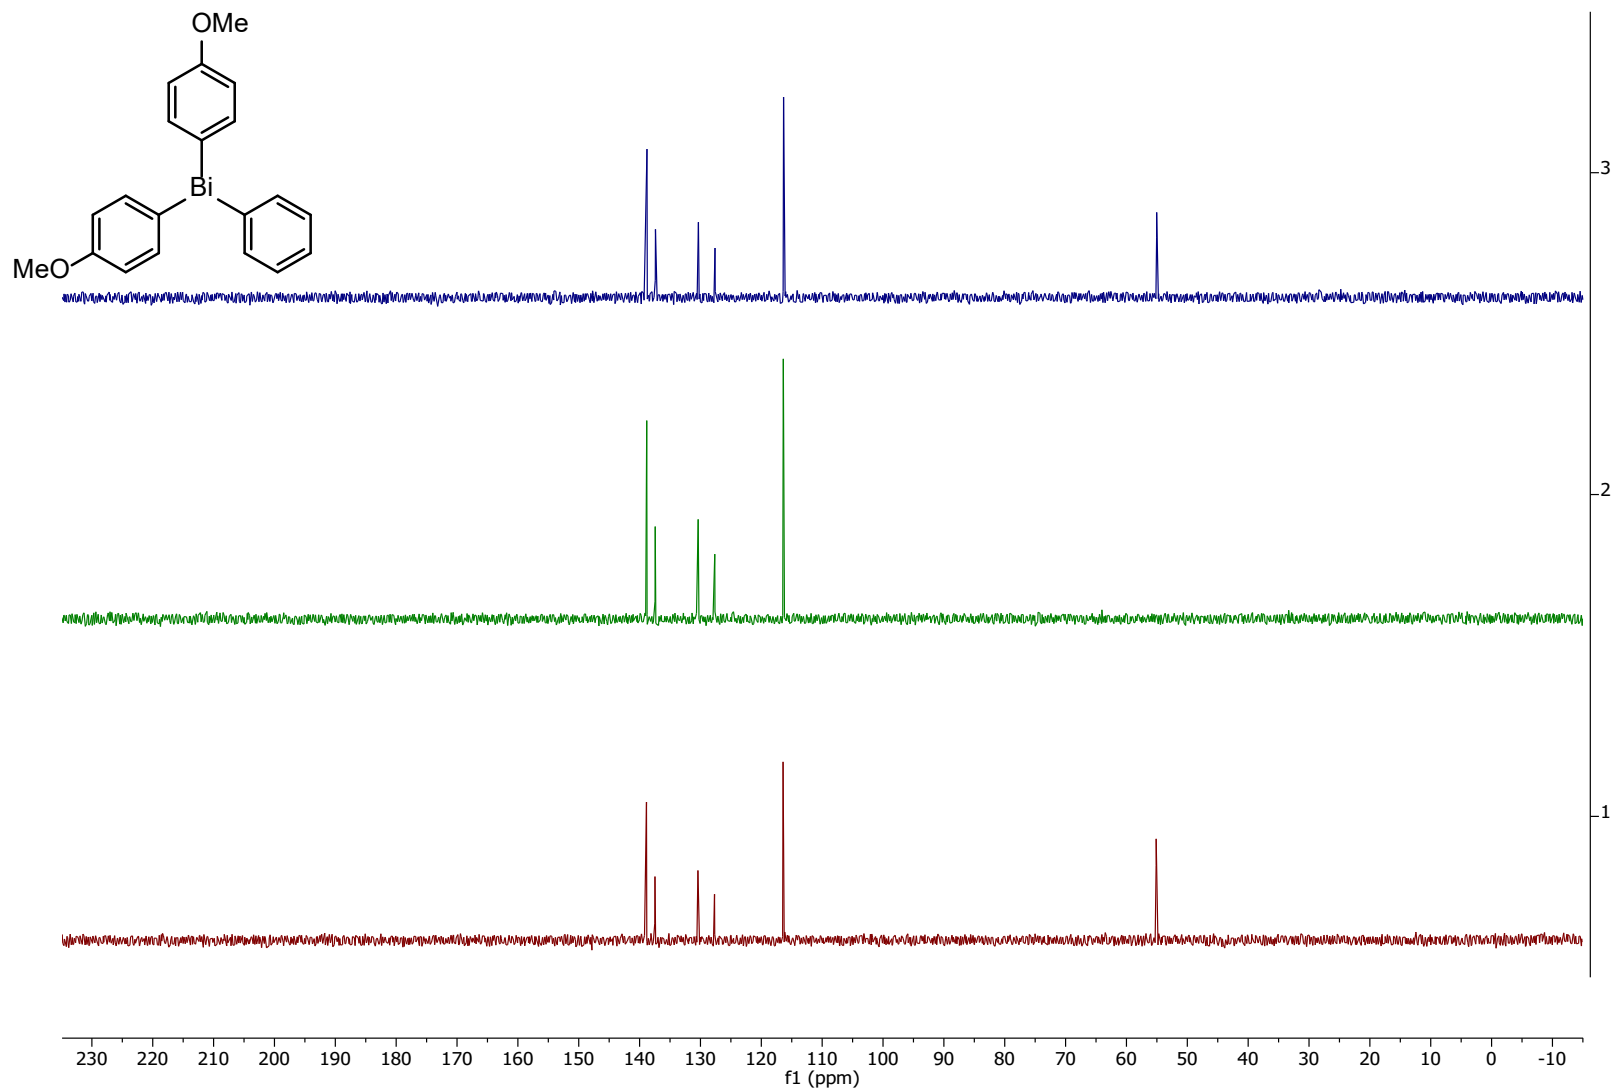

Figure S64.  $^{13}\text{C}$  DEPT of 1j in  $\text{CDCl}_3$

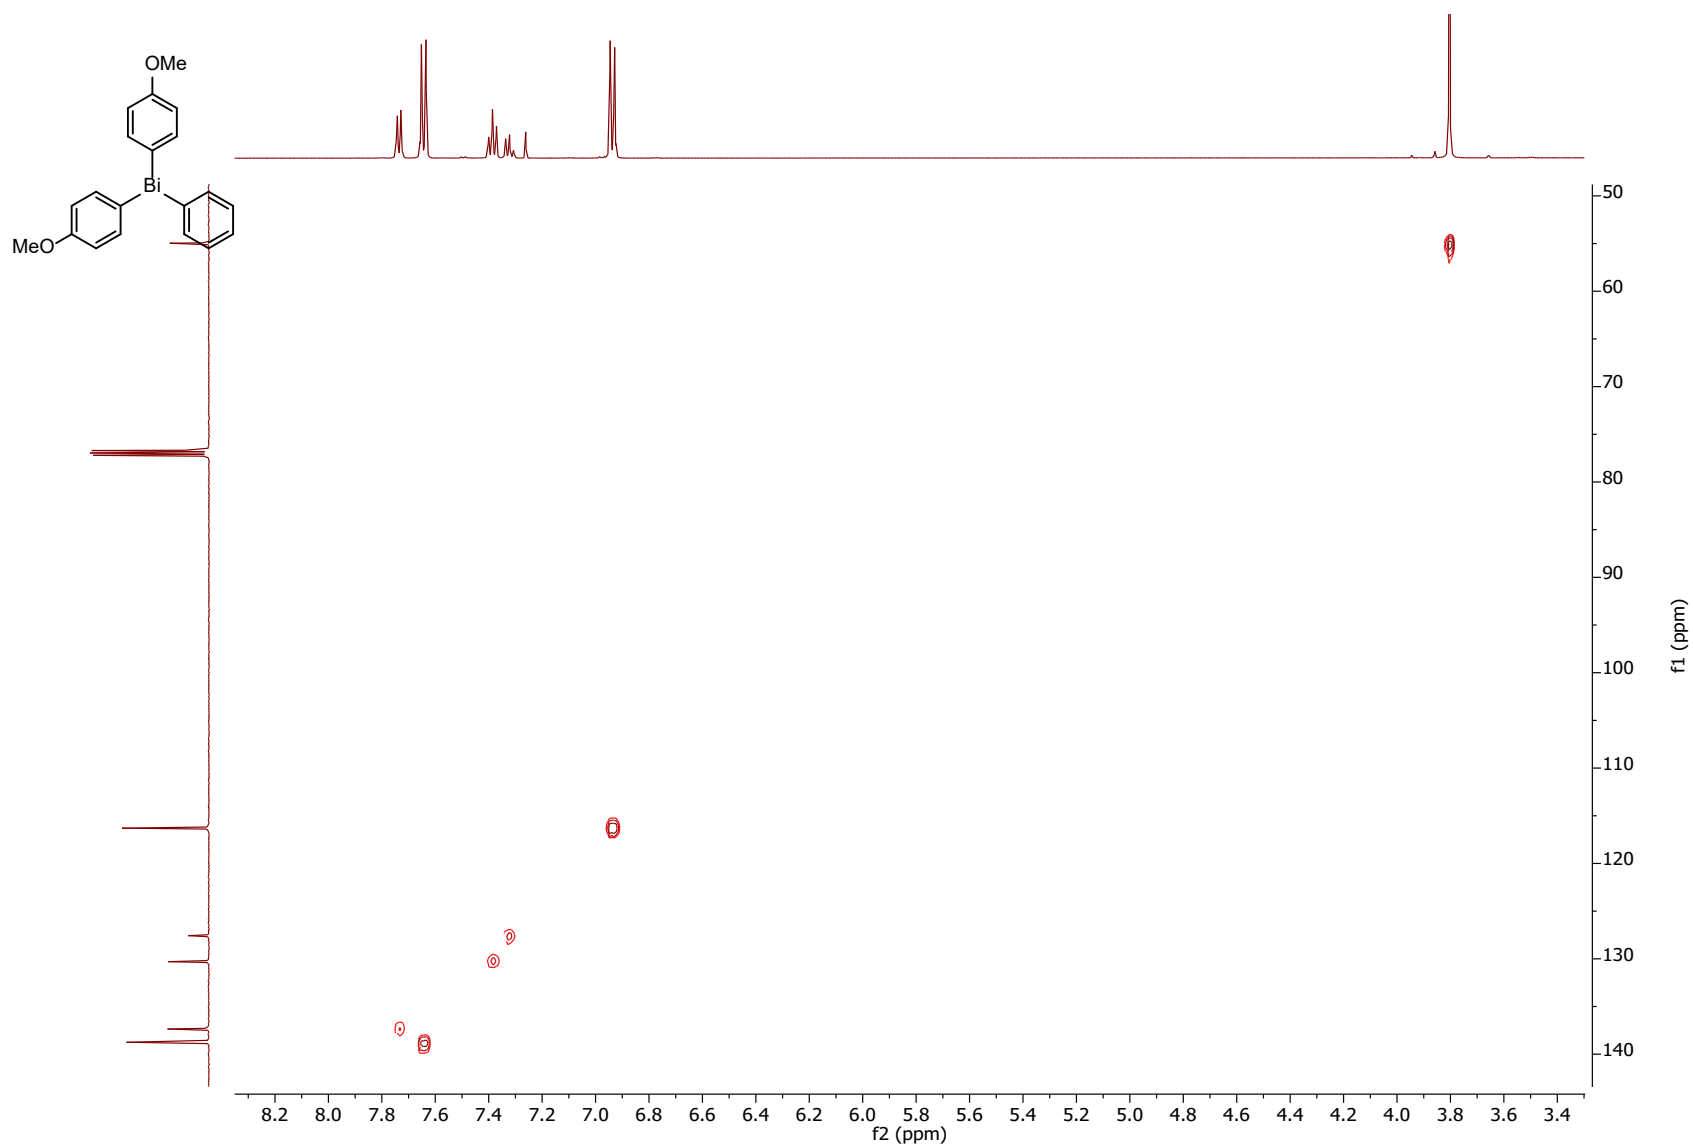

Figure S65. 2D HSQC of **1j** in  $\text{CDCl}_3$

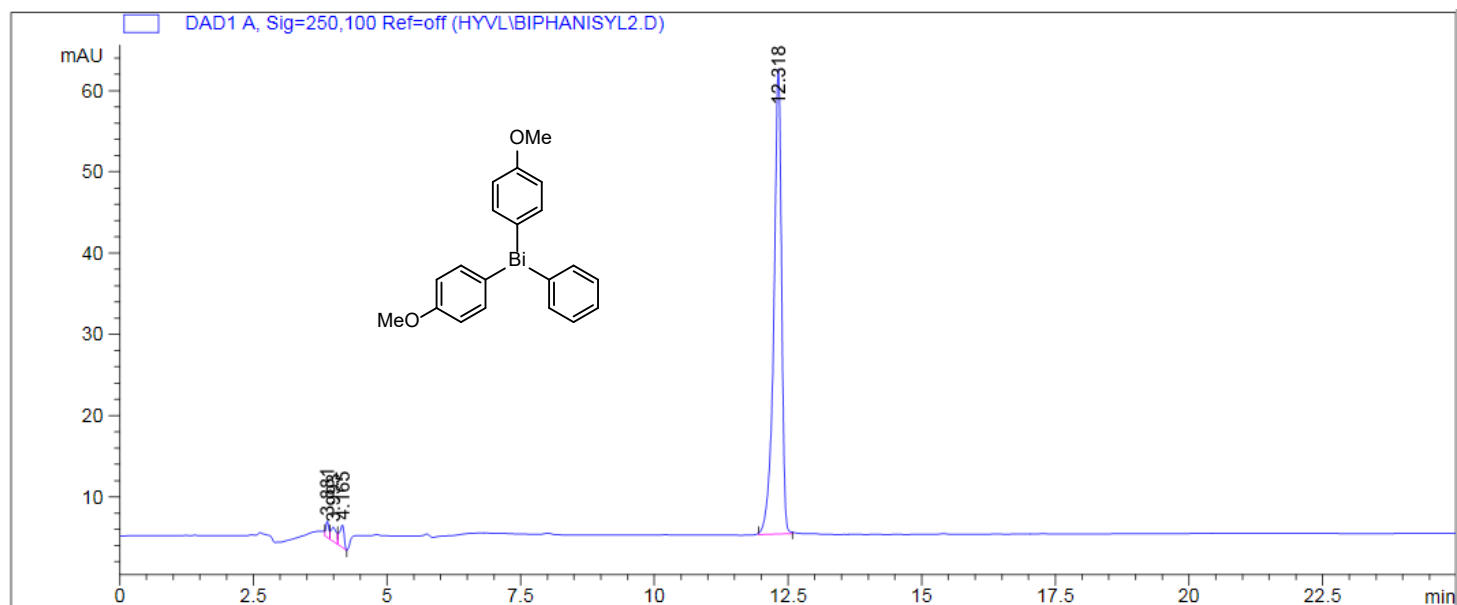

Area Percent Report

Sorted By : Signal  
Multiplier: : 1.0000  
Dilution: : 1.0000  
Sample Amount: : 20.00000 [ng/ul] (not used in calc.)  
Use Multiplier & Dilution Factor with ISTDs

Signal 1: DAD1 A, Sig=250,100 Ref=off

| Peak # | RetTime [min] | Type | Width [min] | Area [mAU*s] | Height [mAU] | Area %  |
|--------|---------------|------|-------------|--------------|--------------|---------|
| 1      | 3.881         | BV   | 0.0568      | 7.76358      | 2.02089      | 1.2641  |
| 2      | 3.993         | VV   | 0.1062      | 13.08445     | 1.73126      | 2.1304  |
| 3      | 4.165         | VV   | 0.0849      | 15.91393     | 2.77373      | 2.5911  |
| 4      | 12.318        | BB   | 0.1516      | 577.41180    | 57.26262     | 94.0144 |

Figure S66. HPLC Chromatogram of 1j

## NMR Spectra and EA Report of Compound 1k

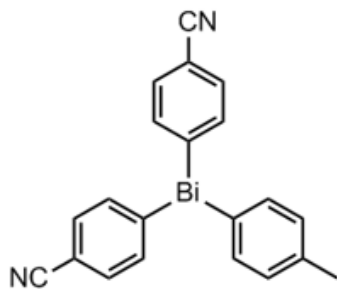

Chemical Formula:  $\text{BiN}_2\text{C}_{21}\text{H}_{15}$

Molecular Weight: 504.35

Elemental Analysis: C: 50.01; Bi: 41.44; H: 3.00; N: 5.55

CENTC Elemental Analysis Facility  
University of Rochester  
Rochester, NY 14627 USA  
Email: ealab@chem.rochester.edu

|                |                      |
|----------------|----------------------|
| Date of report | 10/25/2019 6:17:32PM |
| User ID        | Administrator        |
| Comments       | TLG_2_114B [Hvyl]    |

|             |                       |         |               |
|-------------|-----------------------|---------|---------------|
| DATE & TIME | 10/25/2019 3:06:16 PM | P_ID    | EA LAB        |
| SAMPLE ID   | 19598                 | USER ID | Administrator |
| WEIGHT (mg) | 2.160                 | MODE    | CHN           |

|          |         |
|----------|---------|
| CARBON   | 50.008% |
| HYDROGEN | 2.868%  |
| NITROGEN | 5.464%  |

### Acknowledgment

Analytical data were obtained from the CENTC Elemental Analysis Facility at the University of Rochester, funded by NSF CHE-0650456.

**Figure S67.** EA report for **1k**

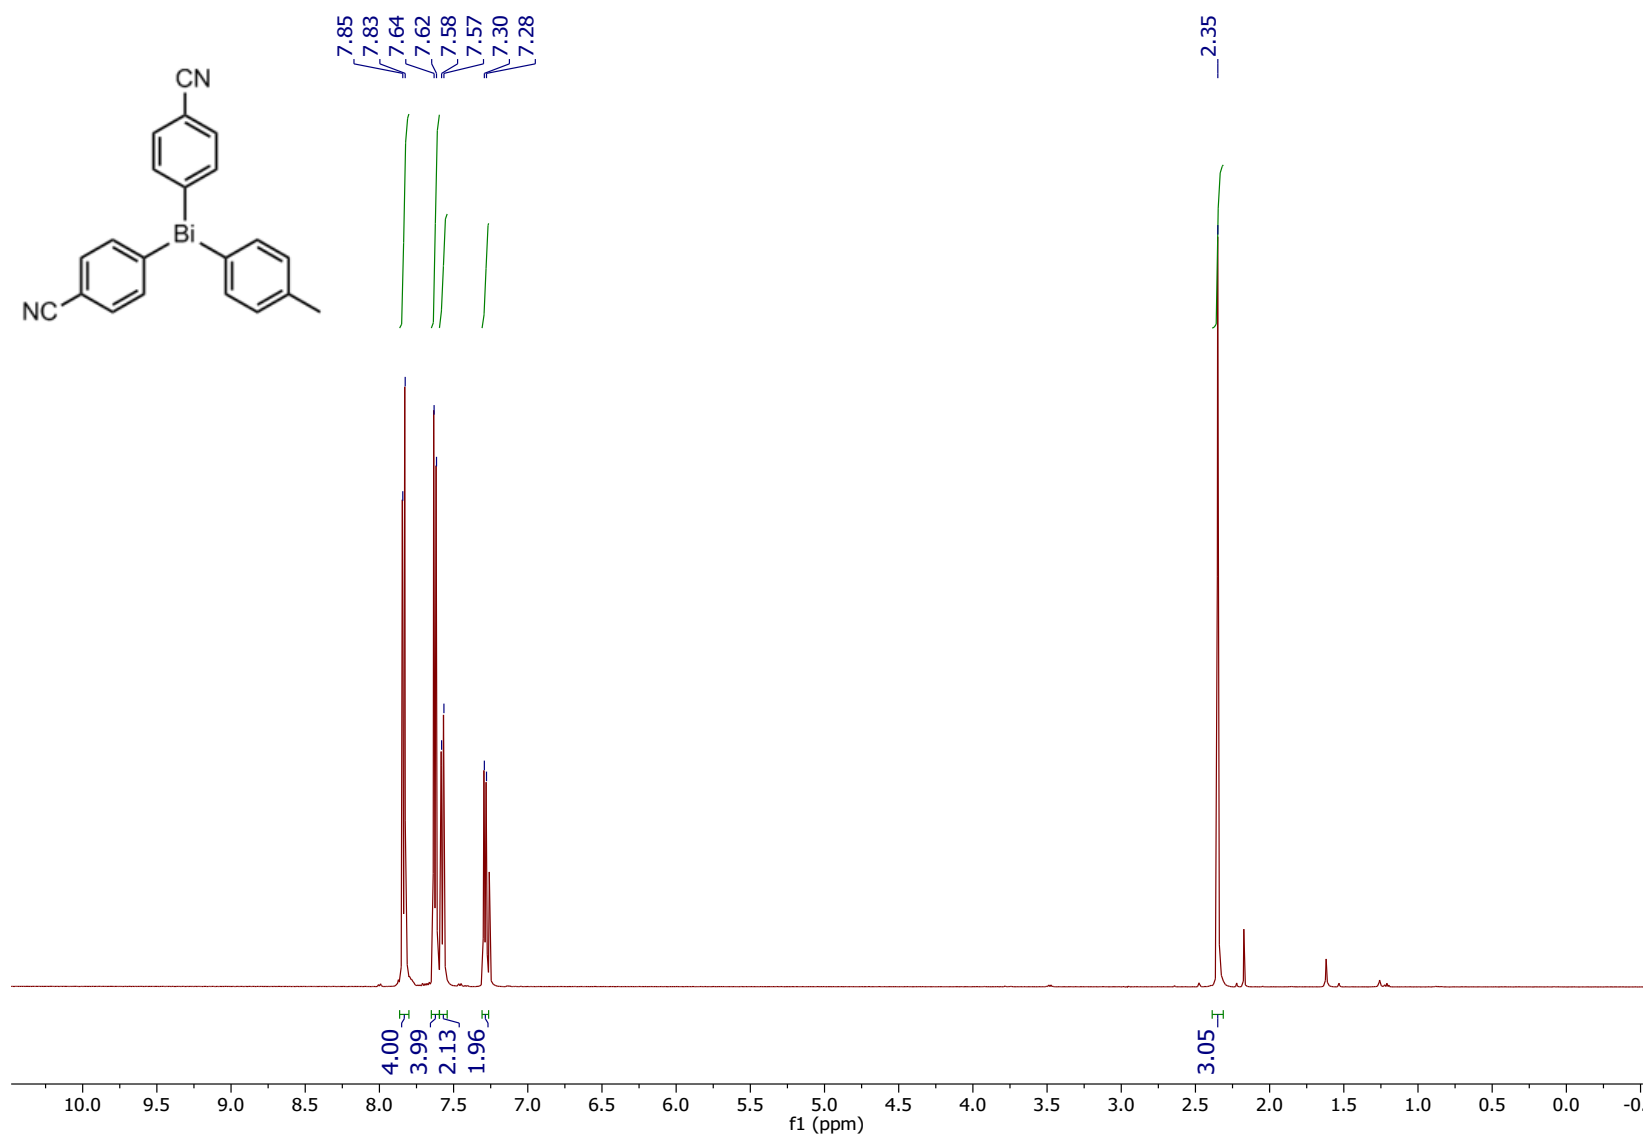

Figure S68. <sup>1</sup>H NMR of **1k** in CDCl<sub>3</sub>



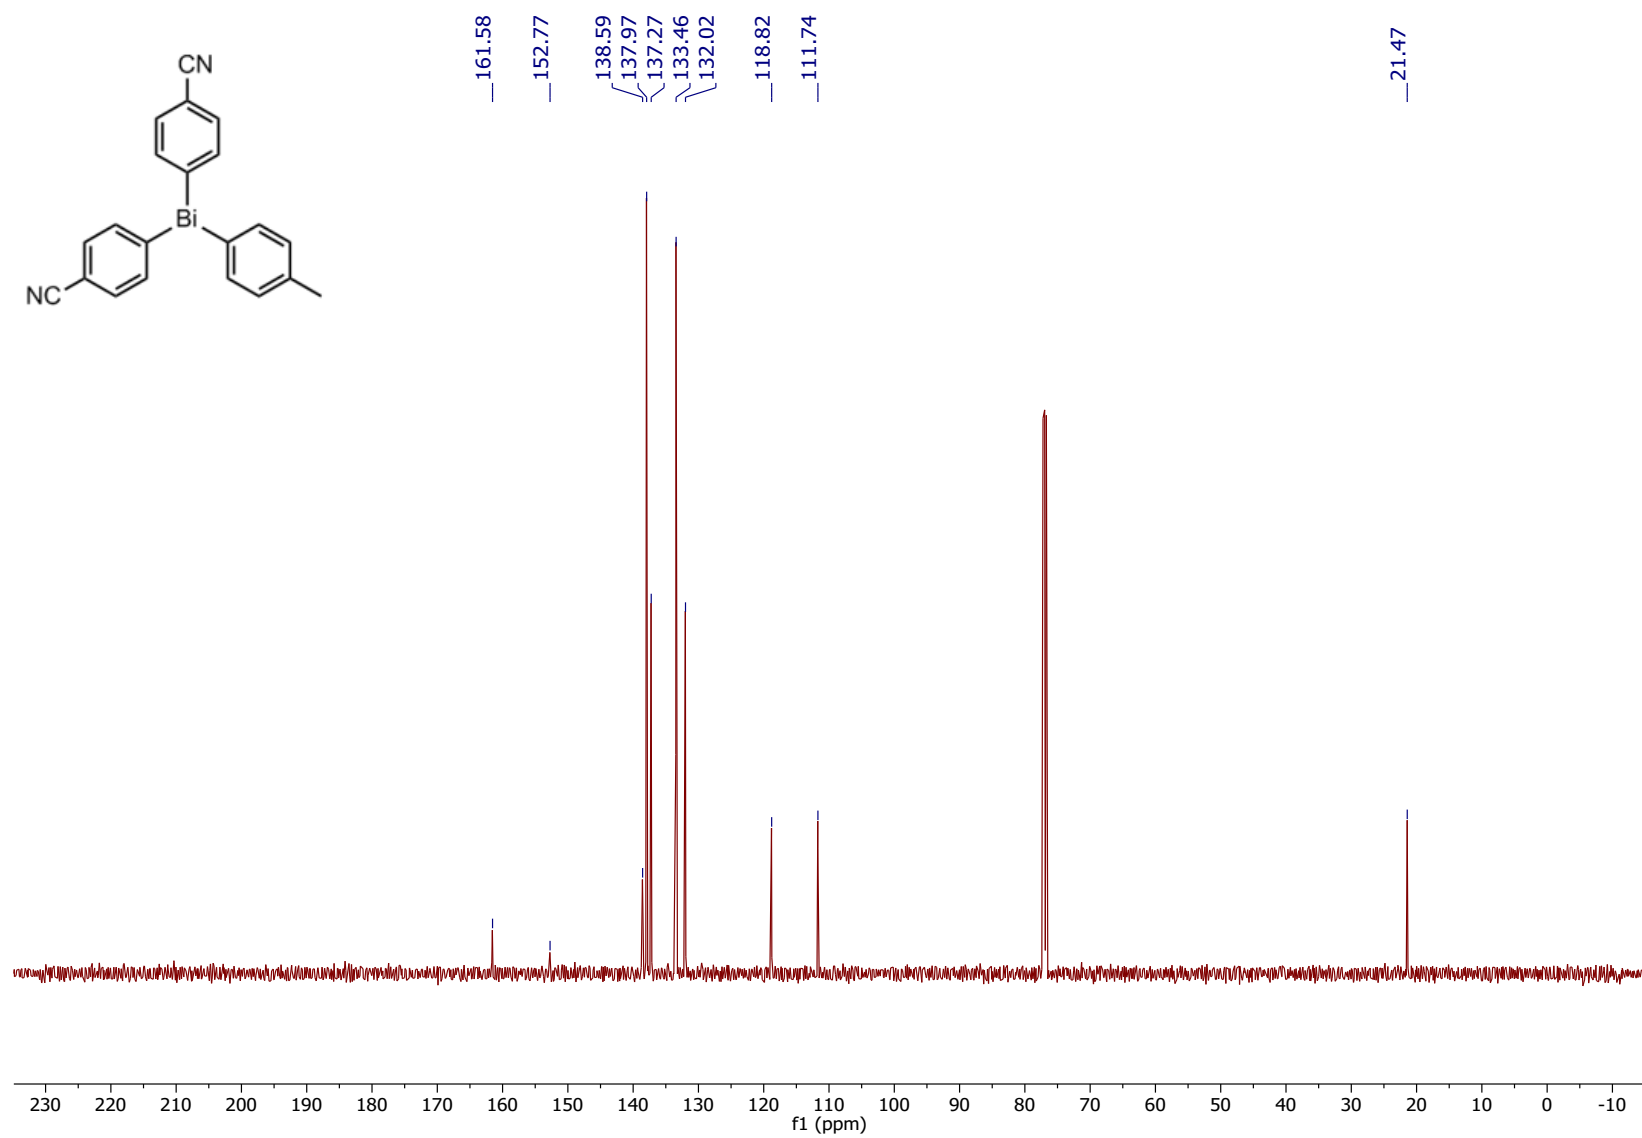

Figure S69. <sup>13</sup>C {<sup>1</sup>H} NMR of **1k** in CDCl<sub>3</sub>

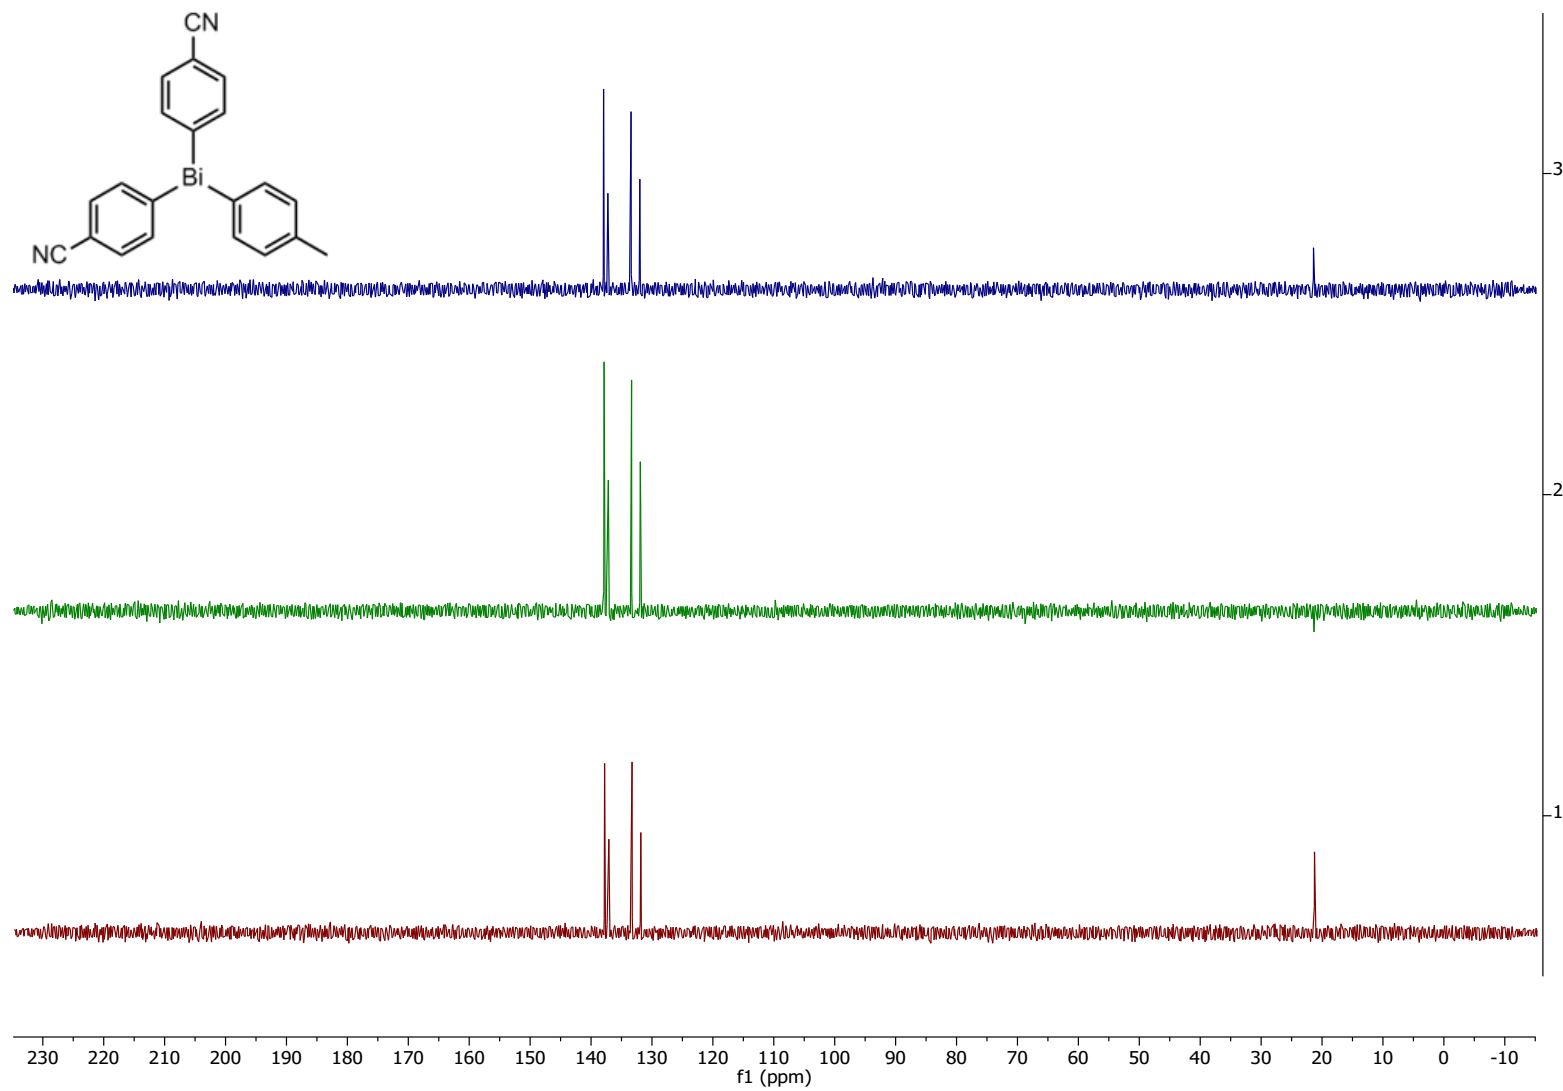

Figure S70.  $^{13}\text{C}$  DEPT of 1k in  $\text{CDCl}_3$

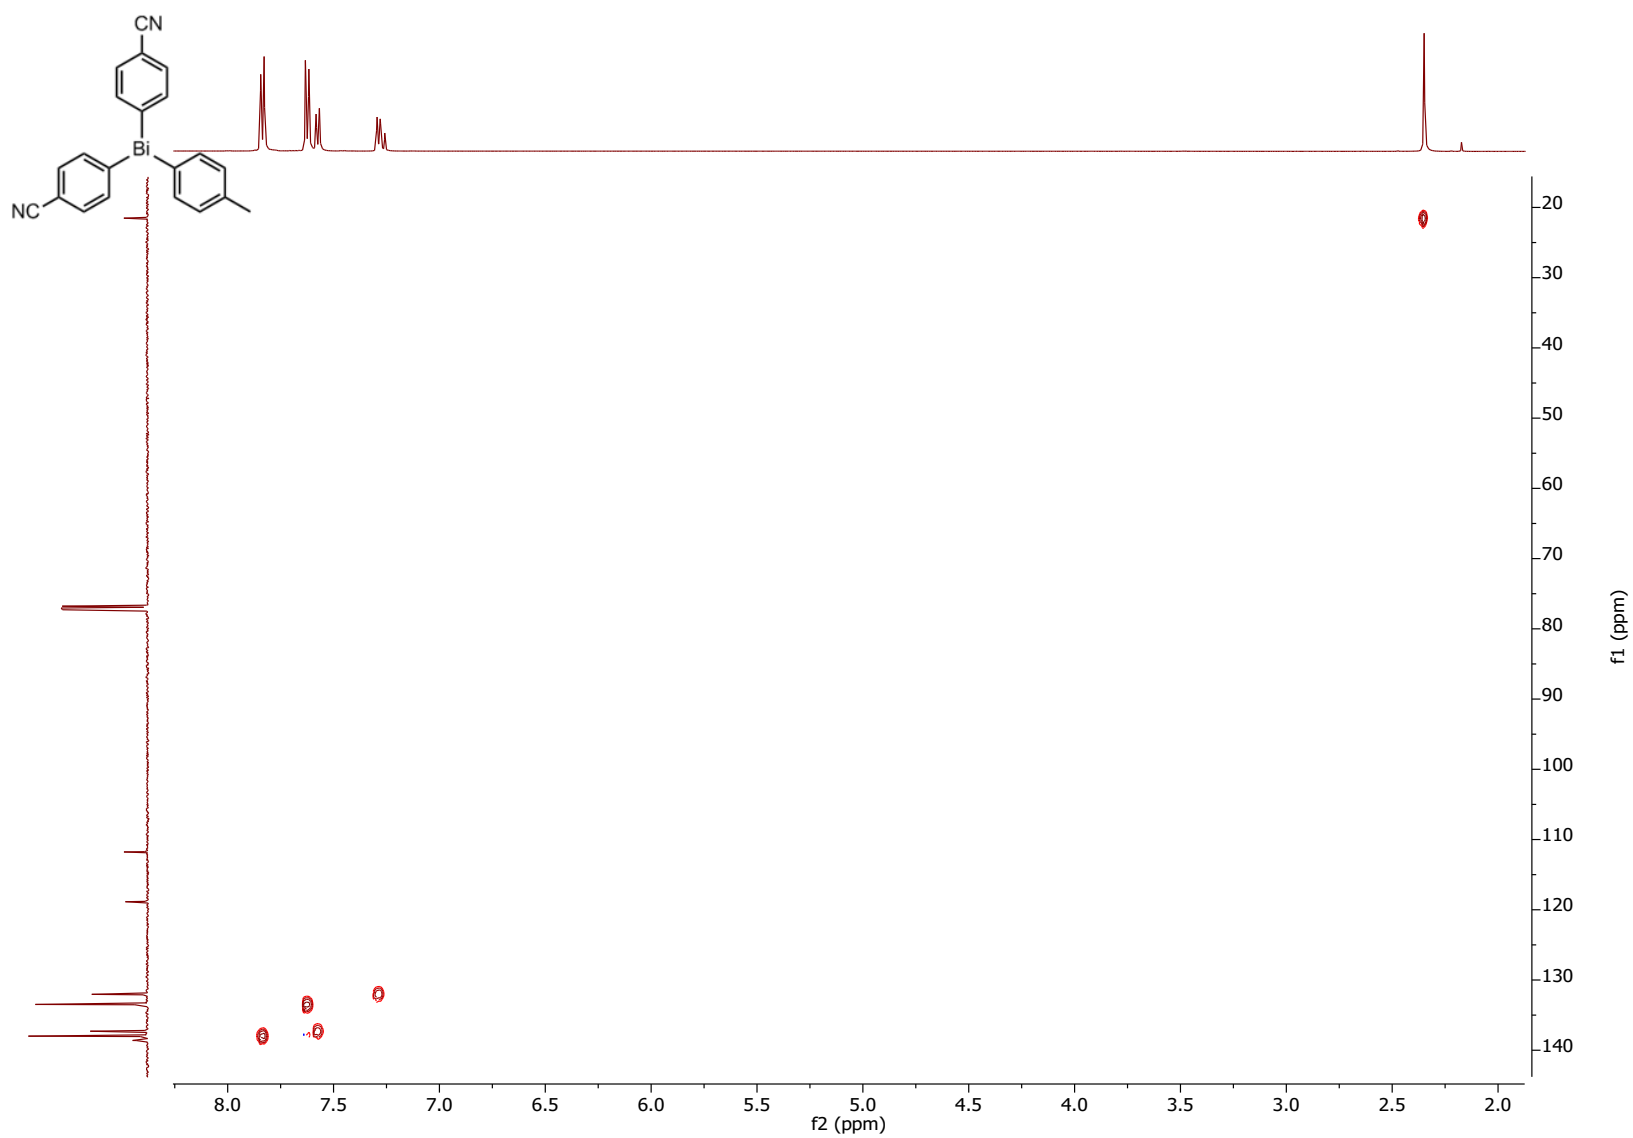

**Figure S71.** 2D HSQC of **1k** in  $\text{CDCl}_3$

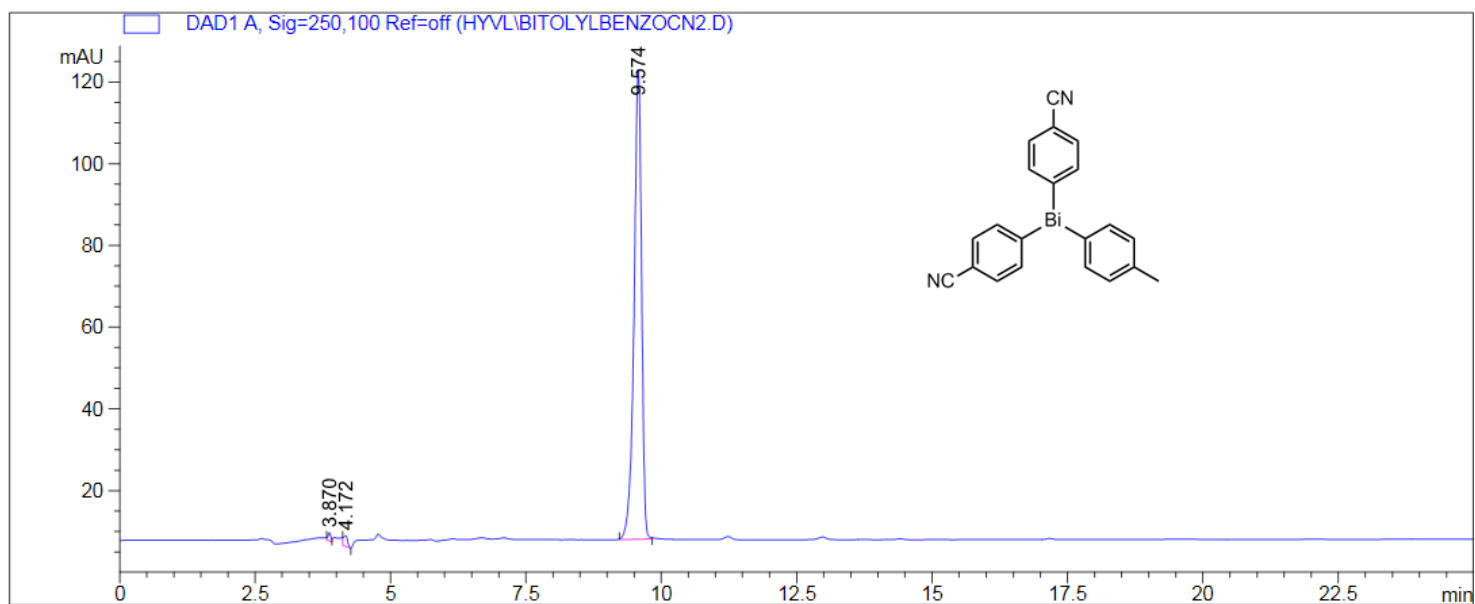

=====  
Area Percent Report  
=====

Sorted By : Signal  
Multiplier: : 1.0000  
Dilution: : 1.0000  
Sample Amount: : 20.00000 [ng/ul] (not used in calc.)  
Use Multiplier & Dilution Factor with ISTDs

Signal 1: DAD1 A, Sig=250,100 Ref=off

| Peak # | RetTime [min] | Type | Width [min] | Area [mAU*s] | Height [mAU] | Area %  |
|--------|---------------|------|-------------|--------------|--------------|---------|
| 1      | 3.870         | BV   | 0.0561      | 7.54989      | 1.99554      | 0.6639  |
| 2      | 4.172         | BV   | 0.0763      | 13.27818     | 2.65567      | 1.1676  |
| 3      | 9.574         | BB   | 0.1493      | 1116.35815   | 114.92860    | 98.1685 |

**Figure S72.** HPLC Chromatogram of **1k**

## NMR Spectra and EA Report of Compound 11

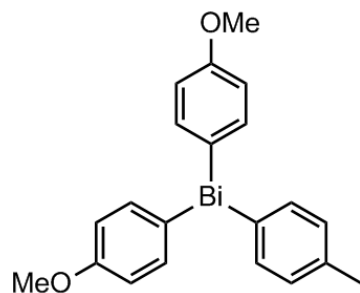

Chemical Formula:  $\text{BiO}_2\text{C}_{21}\text{H}_{21}$

Molecular Weight: 514.38

Elemental Analysis: C: 49.04; Bi: 40.63; H: 4.12; O: 6.22

CENTC Elemental Analysis Facility  
University of Rochester  
Rochester, NY 14627 USA  
Email: ealab@chem.rochester.edu

|                |                      |         |               |
|----------------|----------------------|---------|---------------|
| Date of report | 8/2/2019 5:06:28PM   |         |               |
| User ID        | Administrator        |         |               |
| Comments       | TLG 2-69 [HvM]       |         |               |
| DATE & TIME    | 8/2/2019 12:06:17 PM | P_ID    | EA LAB        |
| SAMPLE ID      | 19485                | USER ID | Administrator |
| WEIGHT (mg)    | 2.159                | MODE    | CHN           |
|                |                      |         |               |
| CARBON         |                      | 49.059% |               |
| HYDROGEN       |                      | 3.900%  |               |
| NITROGEN       |                      | 0.022%  |               |

### Acknowledgment

Analytical data were obtained from the CENTC Elemental Analysis Facility at the University of Rochester, funded by NSF CHE-0650456.

### Instrumentation

Microanalysis samples were weighed with a PerkinElmer Model AD6000 Autobalance and their compositions were determined with a PerkinElmer 2400 Series II Analyzer.

Figure S73. EA report for 11

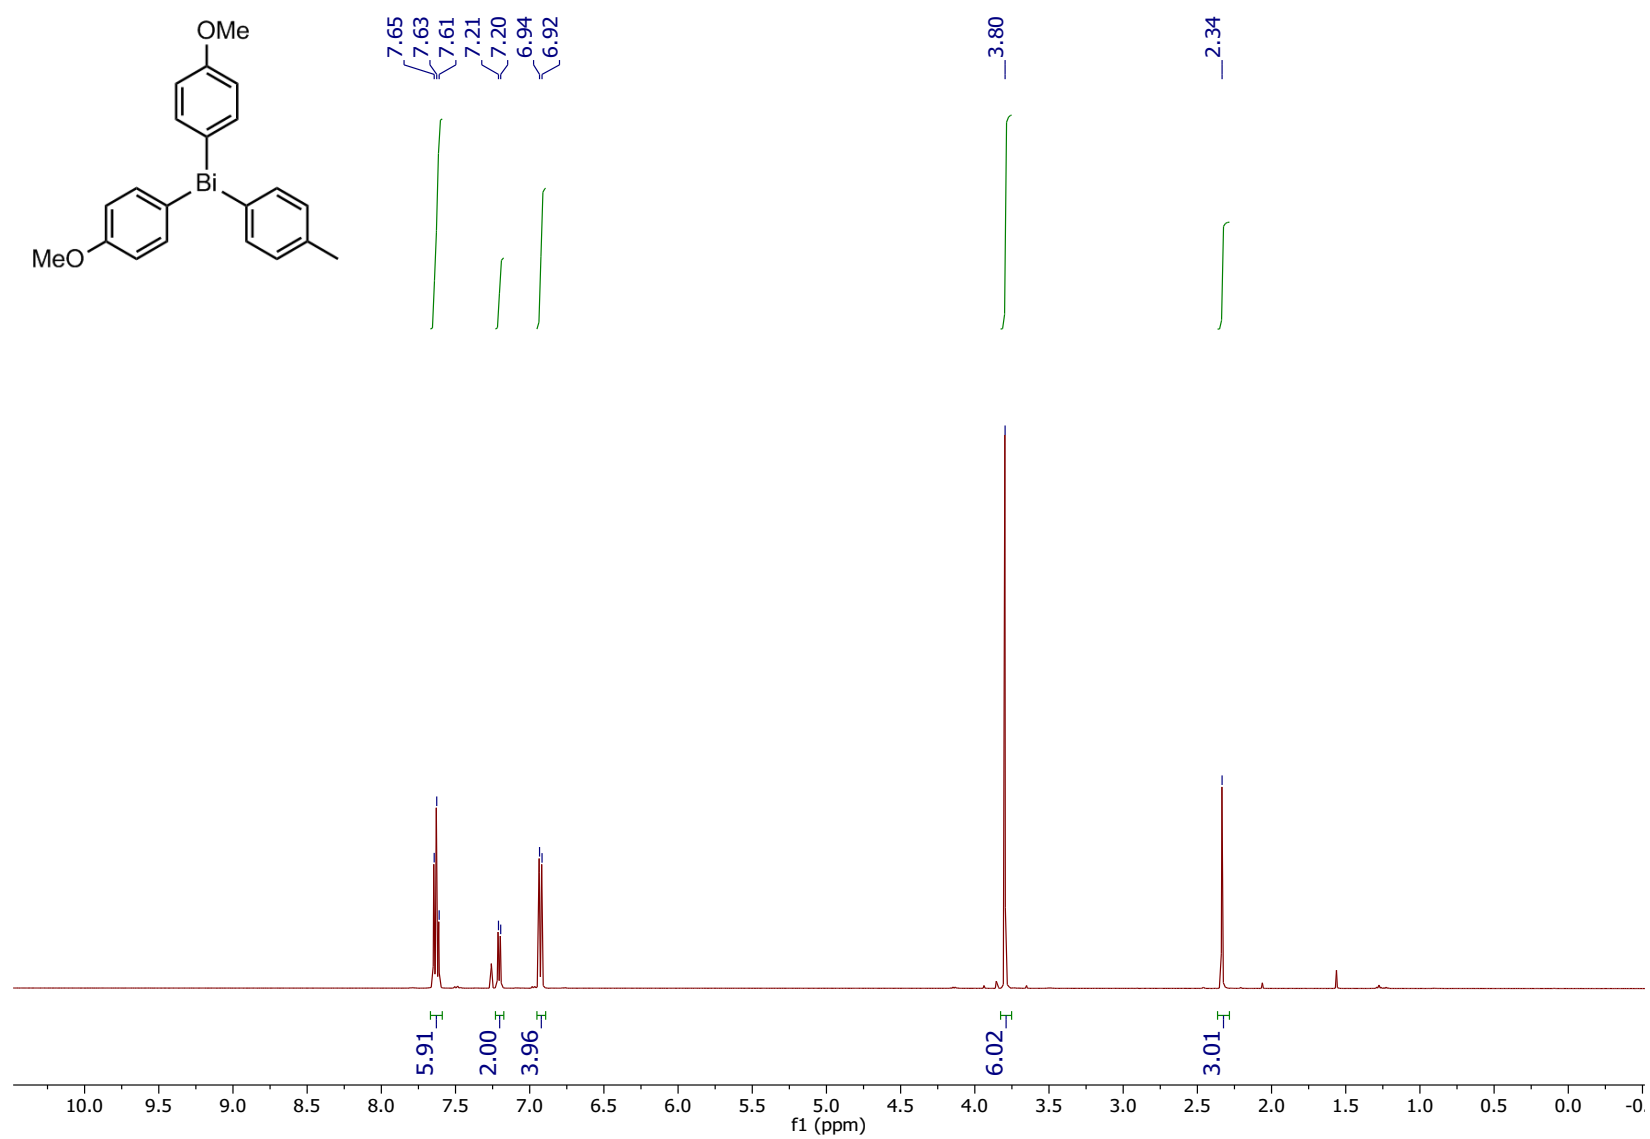

**Figure S74.**  $^1\text{H}$  NMR of **11** in  $\text{CDCl}_3$

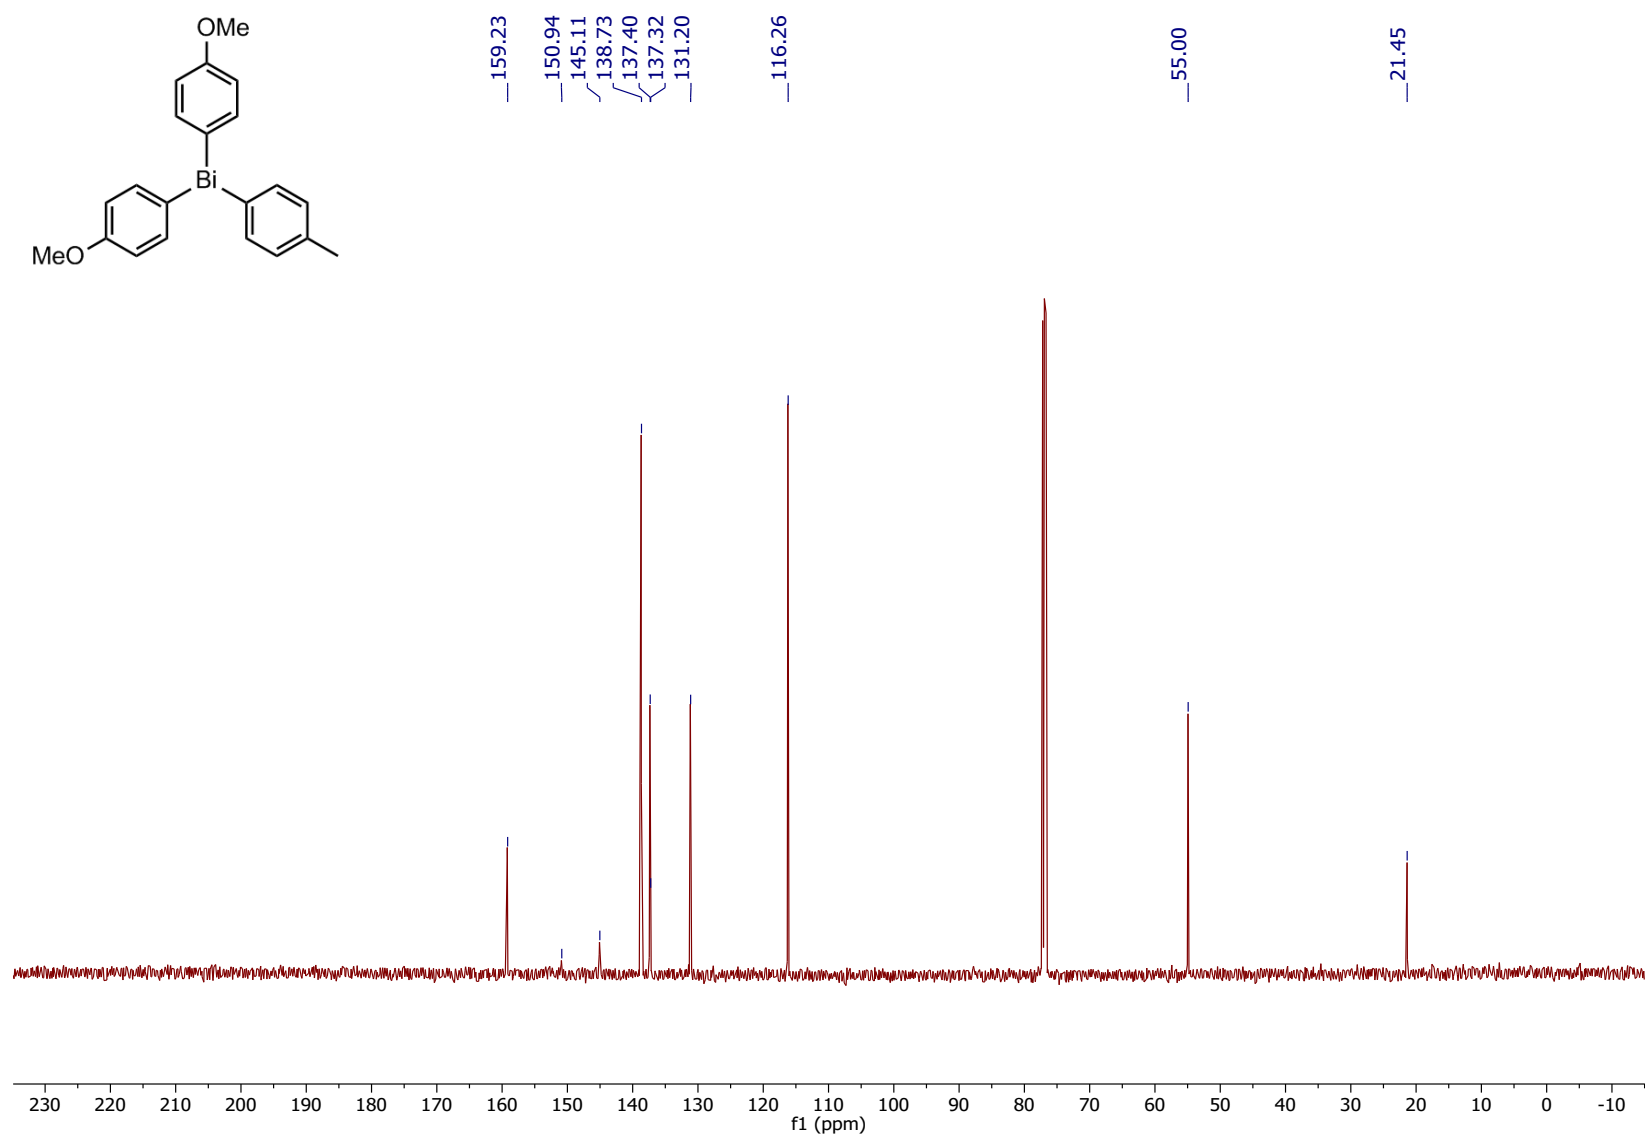

Figure S75.  $^{13}\text{C}$  { $^1\text{H}$ } NMR of **11** in CDCl<sub>3</sub>

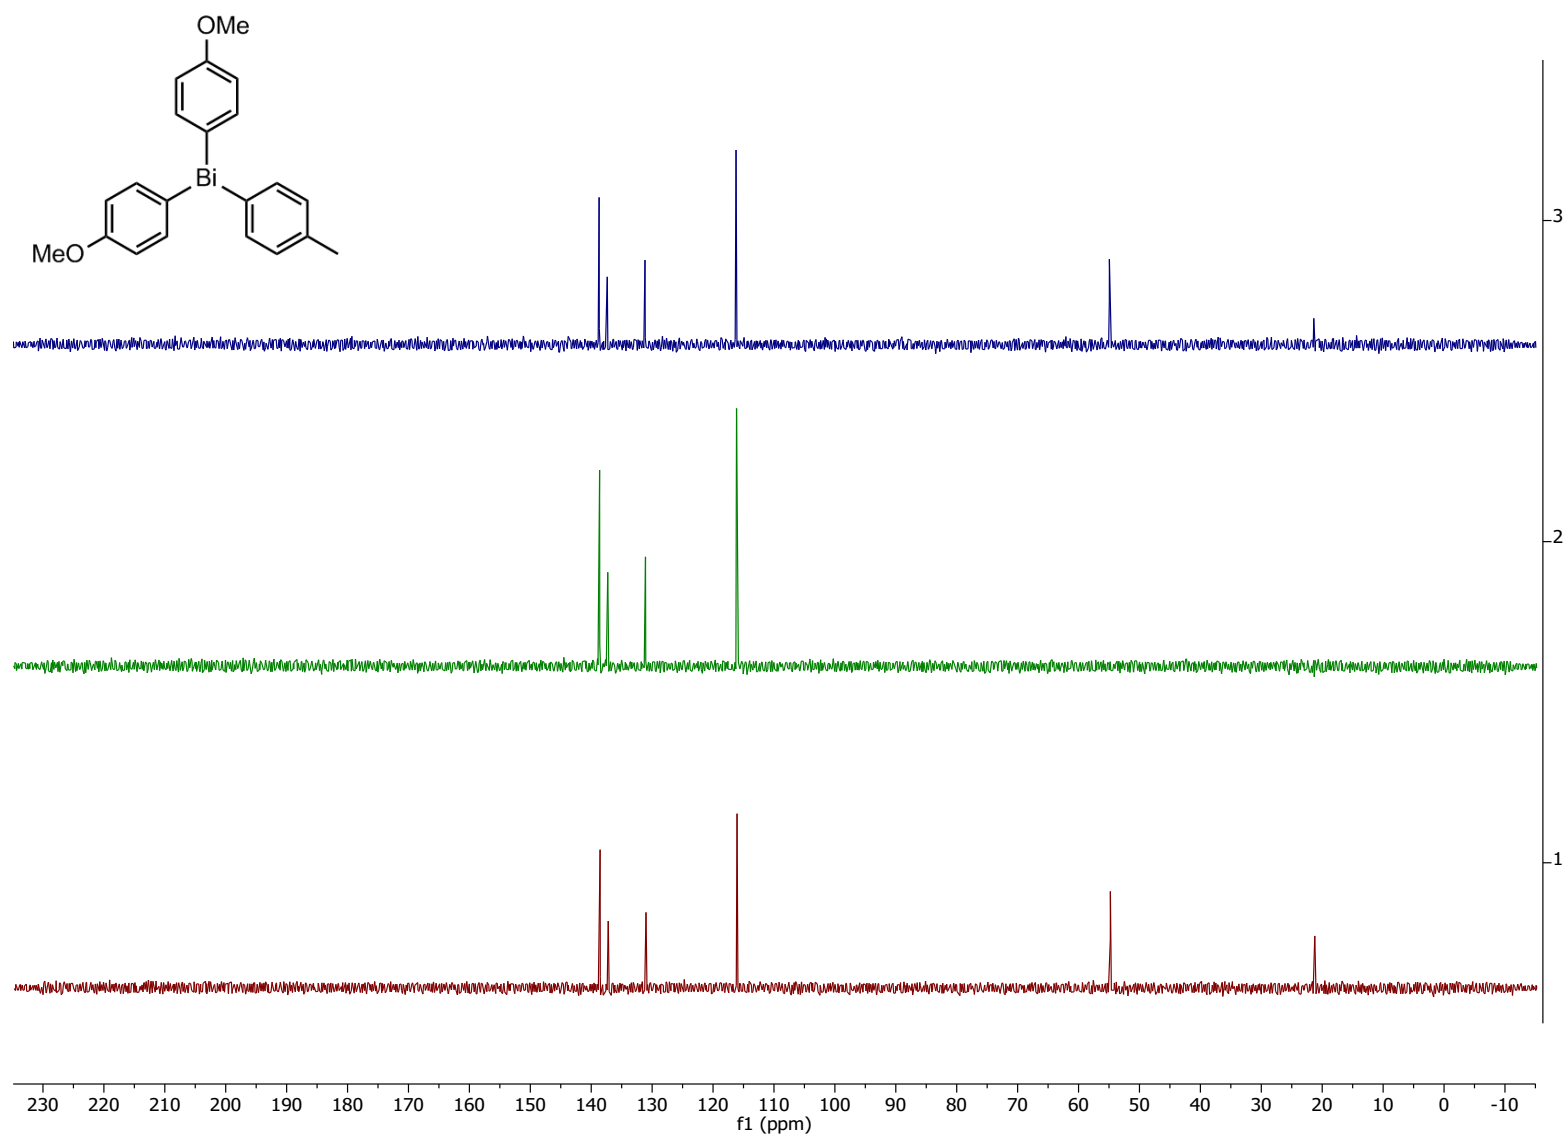

Figure S76.  $^{13}\text{C}$  DEPT of **11** in  $\text{CDCl}_3$



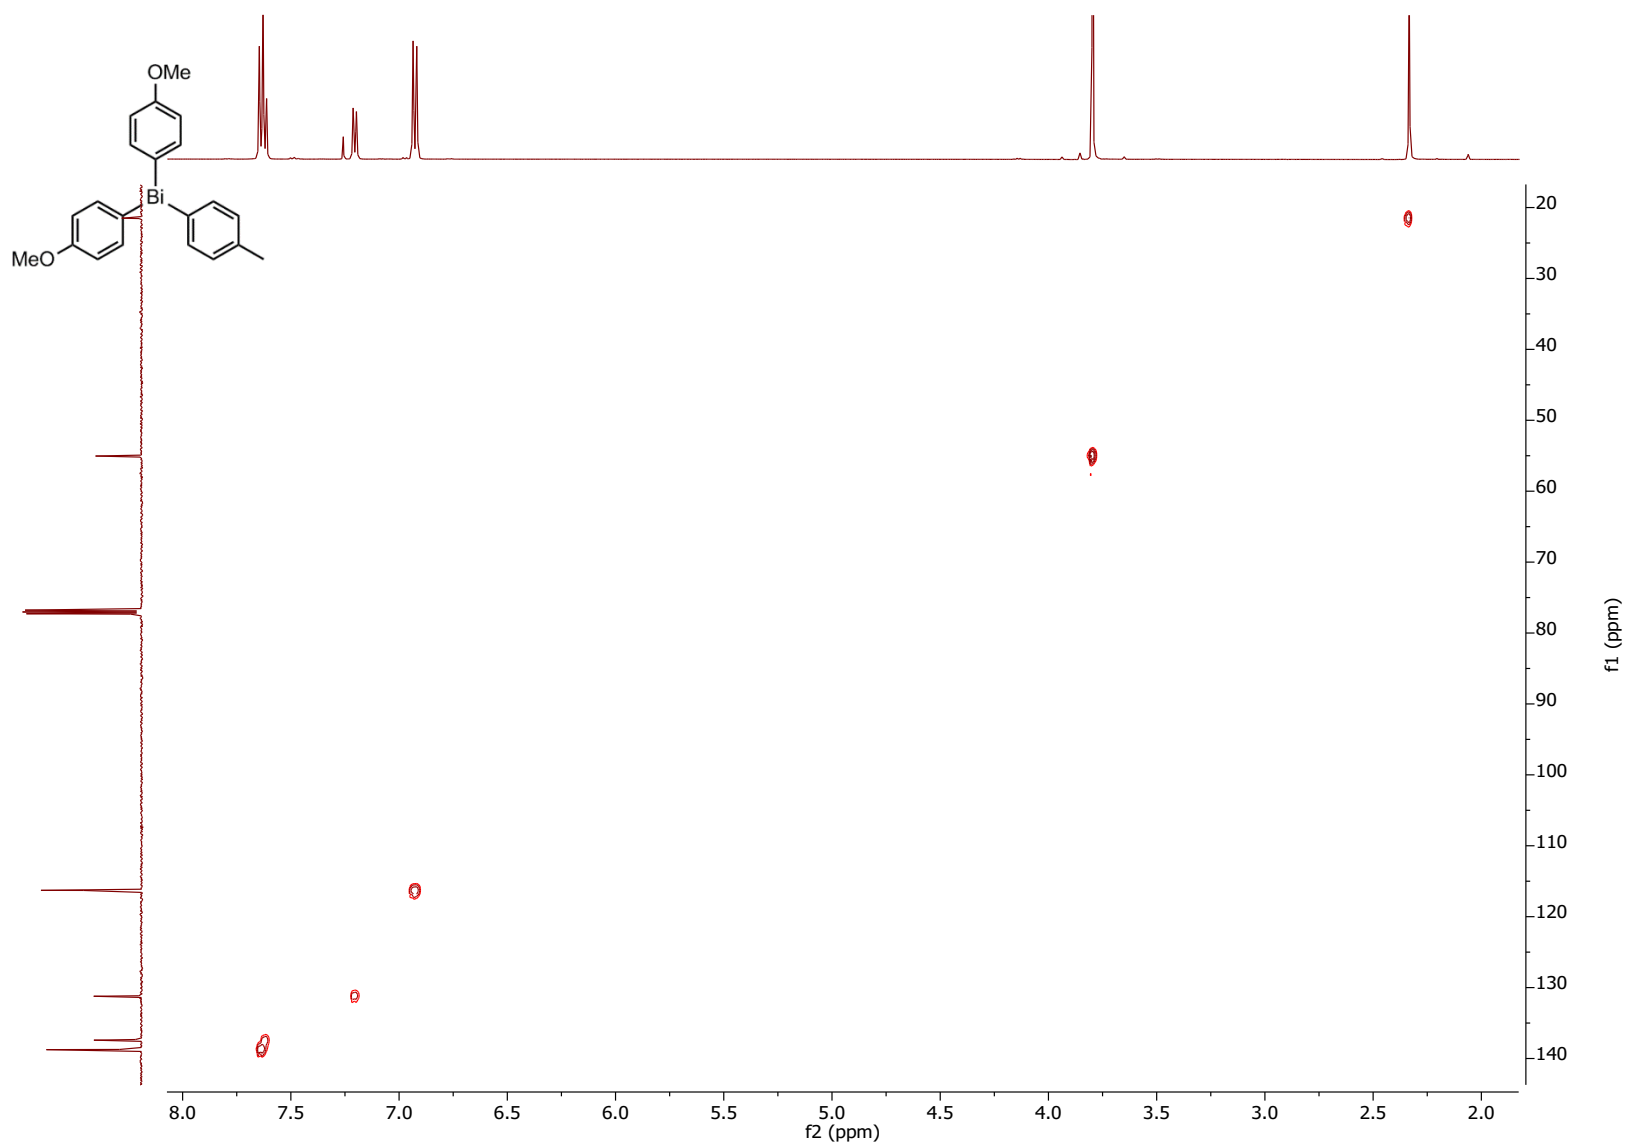

Figure S77. 2D HSQC of **11** in  $\text{CDCl}_3$

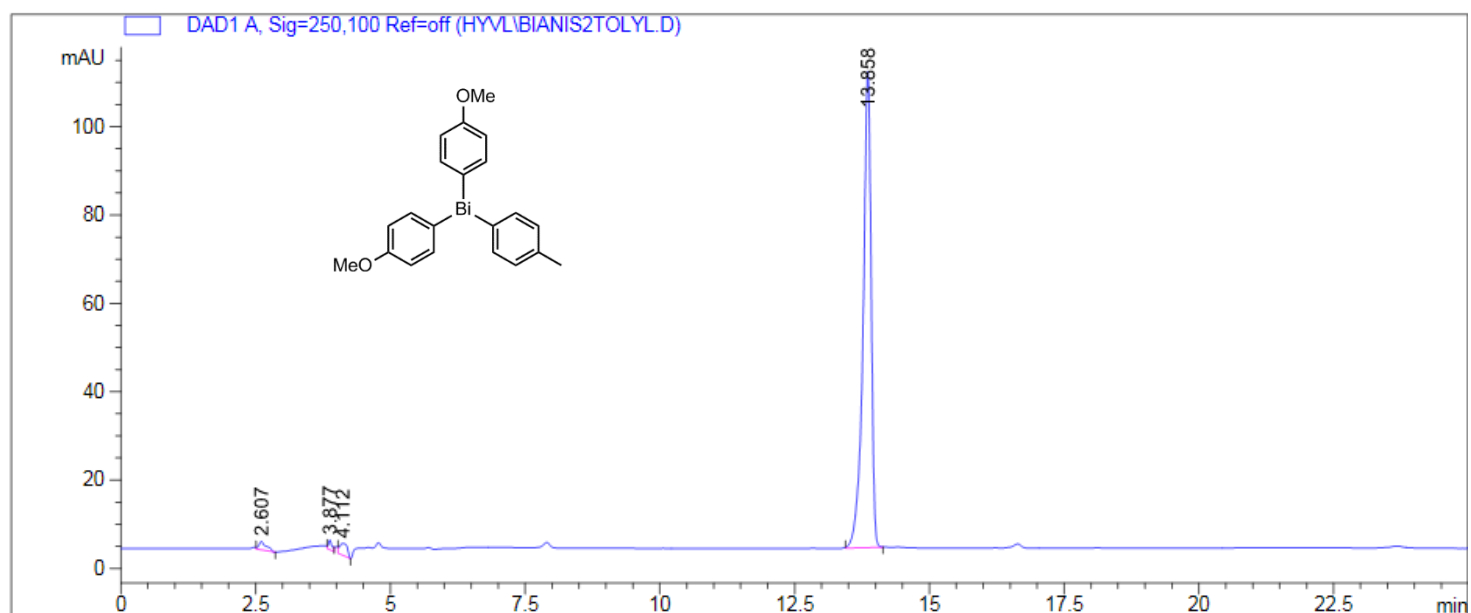

```

=====
                        Area Percent Report
=====

Sorted By           :      Signal
Multiplier:         :      1.0000
Dilution:           :      1.0000
Sample Amount:       :      20.00000 [ng/ul]   (not used in calc.)
Use Multiplier & Dilution Factor with ISTDs
  
```

Signal 1: DAD1 A, Sig=250,100 Ref=off

| Peak # | RetTime [min] | Type | Width [min] | Area [mAU*s] | Height [mAU] | Area %  |
|--------|---------------|------|-------------|--------------|--------------|---------|
| 1      | 2.607         | BB   | 0.1297      | 18.27940     | 1.90881      | 1.5462  |
| 2      | 3.877         | BB   | 0.0663      | 10.20038     | 2.19351      | 0.8628  |
| 3      | 4.112         | BV   | 0.1322      | 26.66670     | 2.67689      | 2.2556  |
| 4      | 13.858        | BB   | 0.1559      | 1127.08960   | 107.88406    | 95.3354 |

**Figure S78.** HPLC Chromatogram of **11**

**8. HPLC Chromatogram of 1:1:1:1 mixture of tri(4-methoxyphenyl)bismuthane, di(4-methoxyphenyl)phenylbismuthane (**1j**), diphenyl(4-methoxyphenyl)bismuthane (**1b**), and triphenylbismuthane used for monitoring of dismutation process in Scheme 2**

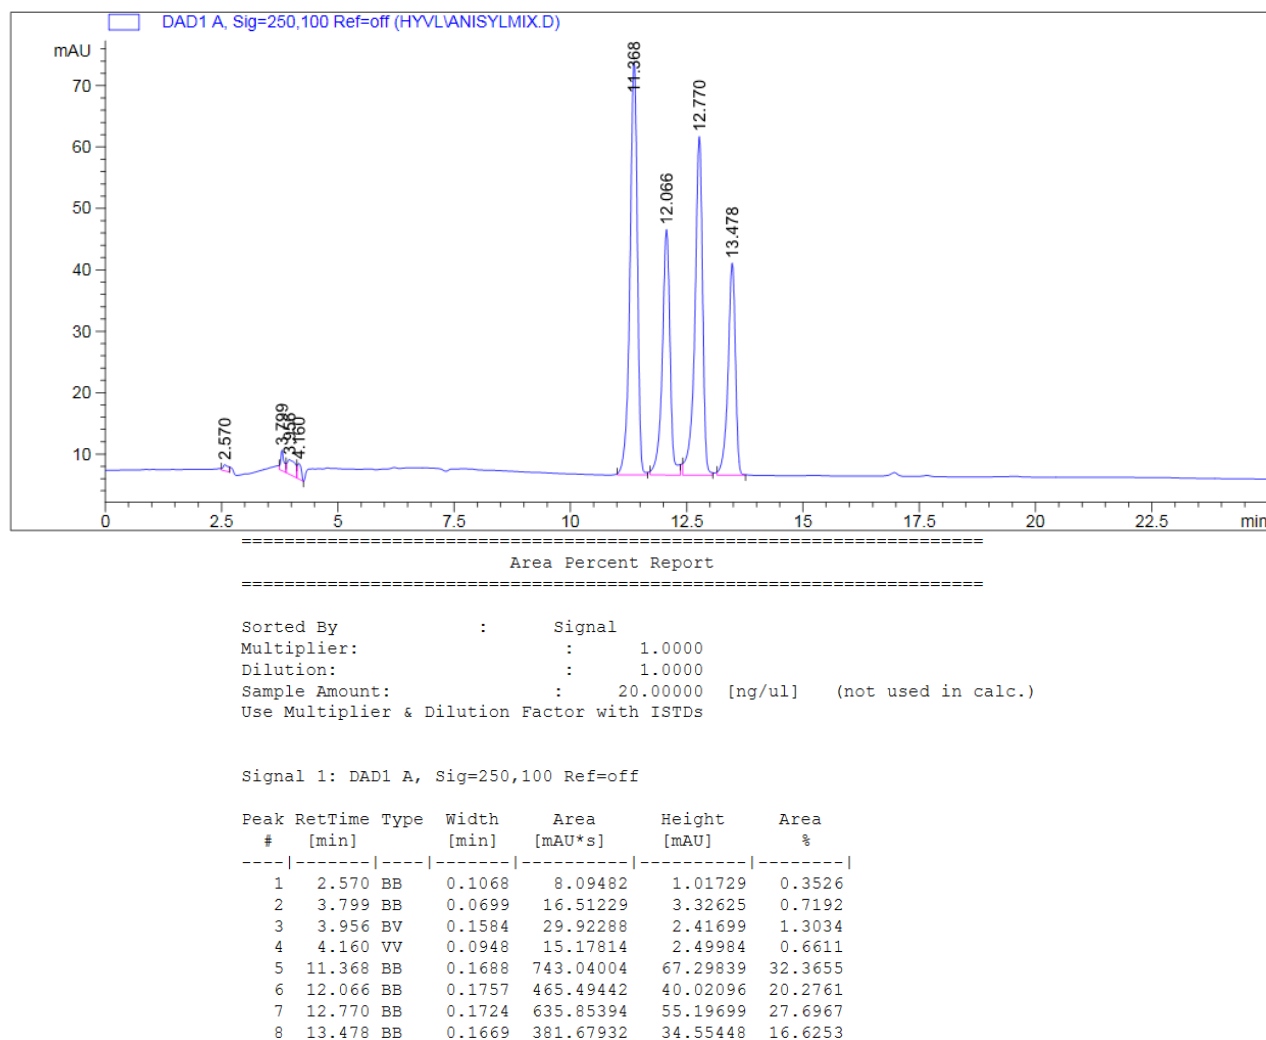

**Figure S79.** HPLC Chromatogram of 1:1:1:1 mixture of tri(4-methoxyphenyl)bismuthane, di(4-methoxyphenyl)phenylbismuthane (**1j**), diphenyl(4-methoxyphenyl)bismuthane (**1b**) and triphenylbismuthane

## 9. Crystal Structure Data for Compound Di(4-cyanophenyl)(*p*-tolyl)bismuthane **1k**

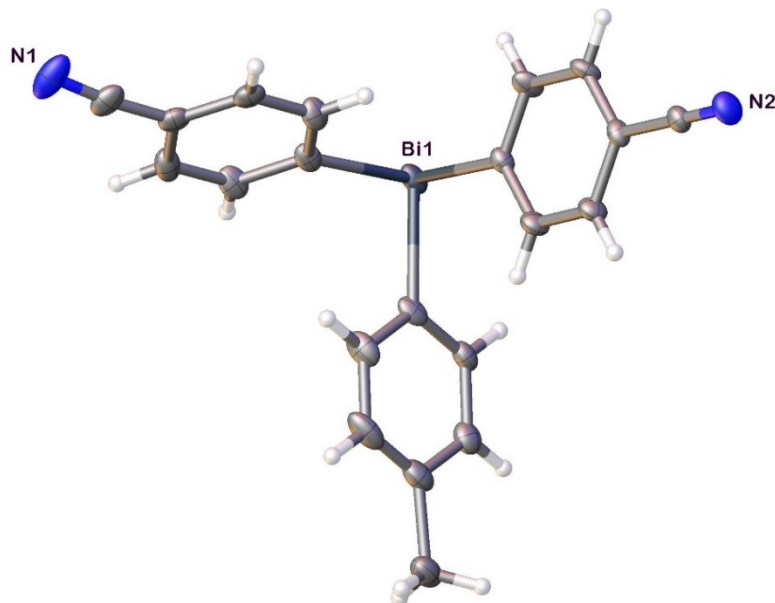

**Figure S80.** Solved Crystal Structure of Di(4-cyanophenyl)(*p*-tolyl)bismuthane **1k**

**Table S2. Crystal data and structure refinement for hyvl12\_0m\_a.**

|                                   |                                                           |                                                         |
|-----------------------------------|-----------------------------------------------------------|---------------------------------------------------------|
| Identification code               | TLG 2-46                                                  |                                                         |
| Empirical formula                 | C <sub>21</sub> H <sub>15</sub> Bi N <sub>2</sub>         |                                                         |
| Formula weight                    | 504.33                                                    |                                                         |
| Temperature                       | 100.0 K                                                   |                                                         |
| Wavelength                        | 0.71073 Å                                                 |                                                         |
| Crystal system                    | Triclinic                                                 |                                                         |
| Space group                       | P-1                                                       |                                                         |
| Unit cell dimensions              | a = 8.1718(10) Å<br>b = 9.9011(14) Å<br>c = 12.3098(15) Å | α = 105.132(4)°.<br>β = 105.299(4)°.<br>γ = 90.697(4)°. |
| Volume                            | 923.9(2) Å <sup>3</sup>                                   |                                                         |
| Z                                 | 2                                                         |                                                         |
| Density (calculated)              | 1.813 Mg/m <sup>3</sup>                                   |                                                         |
| Absorption coefficient            | 9.545 mm <sup>-1</sup>                                    |                                                         |
| F(000)                            | 476                                                       |                                                         |
| Crystal size                      | 0.31 x 0.29 x 0.27 mm <sup>3</sup>                        |                                                         |
| Theta range for data collection   | 1.783 to 26.425°                                          |                                                         |
| Index ranges                      | -10 ≤ h ≤ 8, -12 ≤ k ≤ 12, -15 ≤ l ≤ 15                   |                                                         |
| Reflections collected             | 13782                                                     |                                                         |
| Independent reflections           | 3786 [R(int) = 0.0308]                                    |                                                         |
| Completeness to theta = 25.242°   | 100.0 %                                                   |                                                         |
| Absorption correction             | Semi-empirical from equivalents                           |                                                         |
| Max. and min. transmission        | 0.432 and 0.284                                           |                                                         |
| Refinement method                 | Full-matrix least-squares on F <sup>2</sup>               |                                                         |
| Data / restraints / parameters    | 3786 / 21 / 222                                           |                                                         |
| Goodness-of-fit on F <sup>2</sup> | 1.380                                                     |                                                         |
| Final R indices [I > 2σ(I)]       | R1 = 0.0350, wR2 = 0.0659                                 |                                                         |
| R indices (all data)              | R1 = 0.0383, wR2 = 0.0666                                 |                                                         |
| Extinction coefficient            | n/a                                                       |                                                         |
| Largest diff. peak and hole       | 1.984 and -3.027 e.Å <sup>-3</sup>                        |                                                         |

**Table S3. Atomic coordinates (  $\times 10^4$ ) and equivalent isotropic displacement parameters ( $\text{\AA}^2 \times 10^3$ ) for hyvl12\_0m\_a. U(eq) is defined as one third of the trace of the orthogonalized  $U^{ij}$  tensor.**

|       | x         | y         | z         | U(eq) |
|-------|-----------|-----------|-----------|-------|
| Bi(1) | 2066(1)   | 5487(1)   | 1371(1)   | 21(1) |
| C(1)  | 3382(8)   | 6758(6)   | 521(5)    | 23(1) |
| C(2)  | 5152(8)   | 6989(6)   | 841(5)    | 26(1) |
| C(17) | -478(8)   | 6996(6)   | 2734(5)   | 24(1) |
| C(16) | 696(7)    | 7274(6)   | 2172(5)   | 24(1) |
| N(2)  | 9359(7)   | 6381(6)   | 6917(5)   | 31(1) |
| C(4)  | 5047(8)   | 8148(6)   | -664(5)   | 25(1) |
| C(6)  | 2444(8)   | 7239(6)   | -407(5)   | 27(1) |
| C(12) | 6918(7)   | 6137(6)   | 5031(5)   | 19(1) |
| C(5)  | 3264(9)   | 7942(6)   | -979(5)   | 29(2) |
| C(18) | -1325(8)  | 8077(7)   | 3265(5)   | 28(1) |
| C(10) | 5570(8)   | 4975(6)   | 3017(5)   | 24(1) |
| C(13) | 5642(7)   | 7051(6)   | 5030(5)   | 23(1) |
| C(9)  | 4269(7)   | 5869(6)   | 3010(5)   | 19(1) |
| C(11) | 6890(7)   | 5098(6)   | 4018(5)   | 22(1) |
| C(14) | 4314(7)   | 6917(6)   | 4023(5)   | 23(1) |
| C(20) | 183(9)    | 9731(7)   | 2681(6)   | 37(2) |
| C(3)  | 5975(8)   | 7683(6)   | 270(5)    | 25(1) |
| C(22) | -1790(40) | 10510(30) | 3690(20)  | 36(3) |
| C(21) | 1023(8)   | 8648(7)   | 2147(6)   | 30(2) |
| C(7)  | 5710(40)  | 8730(30)  | -1320(20) | 30(3) |
| C(15) | 8284(7)   | 6276(6)   | 6083(5)   | 21(1) |
| C(19) | -999(8)   | 9444(7)   | 3238(6)   | 30(2) |
| N(3)  | -2459(19) | 11445(13) | 4066(12)  | 50(3) |
| N(1)  | 6341(17)  | 9108(13)  | -1924(10) | 44(3) |
| C(8)  | 6080(40)  | 8900(30)  | -1330(30) | 30(3) |
| C(23) | -2000(40) | 10670(30) | 3920(20)  | 36(3) |

**Table S4. Bond lengths [Å] and angles [°] for *hyvl12\_0m\_a*.**

---

|             |           |
|-------------|-----------|
| Bi(1)-C(1)  | 2.255(6)  |
| Bi(1)-C(16) | 2.253(6)  |
| Bi(1)-C(9)  | 2.263(5)  |
| C(1)-C(2)   | 1.394(8)  |
| C(1)-C(6)   | 1.397(8)  |
| C(2)-H(2)   | 0.9500    |
| C(2)-C(3)   | 1.381(9)  |
| C(17)-H(17) | 0.9500    |
| C(17)-C(16) | 1.384(9)  |
| C(17)-C(18) | 1.394(9)  |
| C(16)-C(21) | 1.393(8)  |
| N(2)-C(15)  | 1.142(7)  |
| C(4)-C(5)   | 1.403(9)  |
| C(4)-C(3)   | 1.391(9)  |
| C(4)-C(7)   | 1.324(14) |
| C(4)-C(8)   | 1.612(16) |
| C(6)-H(6)   | 0.9500    |
| C(6)-C(5)   | 1.386(9)  |
| C(12)-C(13) | 1.389(8)  |
| C(12)-C(11) | 1.388(8)  |
| C(12)-C(15) | 1.443(7)  |
| C(5)-H(5)   | 0.9500    |
| C(18)-H(18) | 0.9500    |
| C(18)-C(19) | 1.387(9)  |
| C(10)-H(10) | 0.9500    |
| C(10)-C(9)  | 1.392(8)  |
| C(10)-C(11) | 1.384(8)  |
| C(13)-H(13) | 0.9500    |
| C(13)-C(14) | 1.390(8)  |
| C(9)-C(14)  | 1.390(8)  |
| C(11)-H(11) | 0.9500    |
| C(14)-H(14) | 0.9500    |
| C(20)-H(20) | 0.9500    |
| C(20)-C(21) | 1.393(10) |

|                   |           |
|-------------------|-----------|
| C(20)-C(19)       | 1.388(10) |
| C(3)-H(3)         | 0.9500    |
| C(22)-C(19)       | 1.321(14) |
| C(22)-N(3)        | 1.135(11) |
| C(21)-H(21)       | 0.9500    |
| C(7)-N(1)         | 1.137(11) |
| C(19)-C(23)       | 1.643(17) |
| C(8)-H(8A)        | 0.9800    |
| C(8)-H(8B)        | 0.9800    |
| C(8)-H(8C)        | 0.9800    |
| C(23)-H(23A)      | 0.9800    |
| C(23)-H(23B)      | 0.9800    |
| C(23)-H(23C)      | 0.9800    |
|                   |           |
| C(1)-Bi(1)-C(9)   | 94.1(2)   |
| C(16)-Bi(1)-C(1)  | 95.0(2)   |
| C(16)-Bi(1)-C(9)  | 93.3(2)   |
| C(2)-C(1)-Bi(1)   | 121.2(4)  |
| C(2)-C(1)-C(6)    | 118.2(6)  |
| C(6)-C(1)-Bi(1)   | 120.4(4)  |
| C(1)-C(2)-H(2)    | 119.2     |
| C(3)-C(2)-C(1)    | 121.6(6)  |
| C(3)-C(2)-H(2)    | 119.2     |
| C(16)-C(17)-H(17) | 119.8     |
| C(16)-C(17)-C(18) | 120.4(6)  |
| C(18)-C(17)-H(17) | 119.8     |
| C(17)-C(16)-Bi(1) | 118.5(4)  |
| C(17)-C(16)-C(21) | 119.2(6)  |
| C(21)-C(16)-Bi(1) | 122.3(5)  |
| C(5)-C(4)-C(8)    | 123.4(12) |
| C(3)-C(4)-C(5)    | 118.4(6)  |
| C(3)-C(4)-C(8)    | 118.1(12) |
| C(7)-C(4)-C(5)    | 116.2(15) |
| C(7)-C(4)-C(3)    | 125.3(15) |
| C(1)-C(6)-H(6)    | 119.8     |
| C(5)-C(6)-C(1)    | 120.4(6)  |

|                   |          |
|-------------------|----------|
| C(5)-C(6)-H(6)    | 119.8    |
| C(13)-C(12)-C(15) | 119.9(5) |
| C(11)-C(12)-C(13) | 120.1(5) |
| C(11)-C(12)-C(15) | 120.0(5) |
| C(4)-C(5)-H(5)    | 119.5    |
| C(6)-C(5)-C(4)    | 120.9(6) |
| C(6)-C(5)-H(5)    | 119.5    |
| C(17)-C(18)-H(18) | 119.8    |
| C(19)-C(18)-C(17) | 120.3(6) |
| C(19)-C(18)-H(18) | 119.8    |
| C(9)-C(10)-H(10)  | 119.4    |
| C(11)-C(10)-H(10) | 119.4    |
| C(11)-C(10)-C(9)  | 121.1(5) |
| C(12)-C(13)-H(13) | 119.8    |
| C(12)-C(13)-C(14) | 120.3(6) |
| C(14)-C(13)-H(13) | 119.8    |
| C(10)-C(9)-Bi(1)  | 118.6(4) |
| C(14)-C(9)-Bi(1)  | 122.0(4) |
| C(14)-C(9)-C(10)  | 119.3(5) |
| C(12)-C(11)-H(11) | 120.3    |
| C(10)-C(11)-C(12) | 119.3(5) |
| C(10)-C(11)-H(11) | 120.3    |
| C(13)-C(14)-H(14) | 120.1    |
| C(9)-C(14)-C(13)  | 119.8(5) |
| C(9)-C(14)-H(14)  | 120.1    |
| C(21)-C(20)-H(20) | 120.0    |
| C(19)-C(20)-H(20) | 120.0    |
| C(19)-C(20)-C(21) | 120.0(6) |
| C(2)-C(3)-C(4)    | 120.4(6) |
| C(2)-C(3)-H(3)    | 119.8    |
| C(4)-C(3)-H(3)    | 119.8    |
| N(3)-C(22)-C(19)  | 178(3)   |
| C(16)-C(21)-C(20) | 120.5(7) |
| C(16)-C(21)-H(21) | 119.7    |
| C(20)-C(21)-H(21) | 119.7    |
| N(1)-C(7)-C(4)    | 174(3)   |



|                     |           |
|---------------------|-----------|
| N(2)-C(15)-C(12)    | 179.6(7)  |
| C(18)-C(19)-C(20)   | 119.6(6)  |
| C(18)-C(19)-C(23)   | 117.7(13) |
| C(20)-C(19)-C(23)   | 122.7(13) |
| C(22)-C(19)-C(18)   | 123.5(16) |
| C(22)-C(19)-C(20)   | 116.9(16) |
| C(4)-C(8)-H(8A)     | 109.5     |
| C(4)-C(8)-H(8B)     | 109.5     |
| C(4)-C(8)-H(8C)     | 109.5     |
| H(8A)-C(8)-H(8B)    | 109.5     |
| H(8A)-C(8)-H(8C)    | 109.5     |
| H(8B)-C(8)-H(8C)    | 109.5     |
| C(19)-C(23)-H(23A)  | 109.5     |
| C(19)-C(23)-H(23B)  | 109.5     |
| C(19)-C(23)-H(23C)  | 109.5     |
| H(23A)-C(23)-H(23B) | 109.5     |
| H(23A)-C(23)-H(23C) | 109.5     |
| H(23B)-C(23)-H(23C) | 109.5     |

---

Symmetry transformations used to generate equivalent atoms:

**Table S5. Anisotropic displacement parameters ( $\text{\AA}^2 \times 10^3$ ) for hyvl12\_0m\_a. The anisotropic displacement factor exponent takes the form:  $-2\pi^2 [h^2 a^{*2}U^{11} + \dots + 2hka^*b^*U^{12}]$**

|       | $U^{11}$ | $U^{22}$ | $U^{33}$ | $U^{23}$ | $U^{13}$ | $U^{12}$ |
|-------|----------|----------|----------|----------|----------|----------|
| Bi(1) | 18(1)    | 16(1)    | 23(1)    | 5(1)     | -5(1)    | -3(1)    |
| C(1)  | 28(3)    | 14(3)    | 18(3)    | 0(2)     | -2(2)    | -1(2)    |
| C(2)  | 25(3)    | 24(3)    | 20(3)    | 5(3)     | -4(3)    | -3(3)    |
| C(17) | 25(3)    | 19(3)    | 25(3)    | 10(3)    | 0(3)     | 3(2)     |
| C(16) | 16(3)    | 21(3)    | 26(3)    | 6(3)     | -6(2)    | 1(2)     |
| N(2)  | 28(3)    | 31(3)    | 29(3)    | 10(2)    | -1(2)    | 3(2)     |
| C(4)  | 28(2)    | 19(2)    | 22(2)    | -4(2)    | 9(2)     | 1(2)     |
| C(6)  | 24(3)    | 22(3)    | 24(3)    | 2(3)     | -7(3)    | -4(3)    |
| C(12) | 13(3)    | 22(3)    | 22(3)    | 10(2)    | 1(2)     | 0(2)     |
| C(5)  | 42(4)    | 22(3)    | 18(3)    | 4(3)     | 0(3)     | 0(3)     |
| C(18) | 23(3)    | 33(4)    | 28(3)    | 13(3)    | 0(3)     | 3(3)     |
| C(10) | 26(3)    | 13(3)    | 25(3)    | -1(2)    | -1(3)    | 1(2)     |
| C(13) | 18(2)    | 25(2)    | 26(2)    | 7(2)     | 3(2)     | 7(2)     |
| C(9)  | 18(3)    | 17(3)    | 21(3)    | 7(2)     | 1(2)     | 1(2)     |
| C(11) | 19(3)    | 14(3)    | 31(3)    | 5(2)     | 3(2)     | 6(2)     |
| C(14) | 18(2)    | 25(2)    | 26(2)    | 7(2)     | 3(2)     | 7(2)     |
| C(20) | 37(4)    | 18(3)    | 46(4)    | 10(3)    | -8(3)    | 0(3)     |
| C(3)  | 28(2)    | 19(2)    | 22(2)    | -4(2)    | 9(2)     | 1(2)     |
| C(22) | 49(7)    | 28(5)    | 28(8)    | 6(5)     | 4(5)     | 13(3)    |
| C(21) | 23(3)    | 22(3)    | 44(4)    | 14(3)    | 1(3)     | -5(3)    |
| C(7)  | 38(9)    | 24(6)    | 23(3)    | -5(4)    | 12(5)    | -7(6)    |
| C(15) | 22(3)    | 18(3)    | 23(3)    | 9(2)     | 4(3)     | 2(2)     |
| C(19) | 29(4)    | 24(3)    | 31(3)    | 9(3)     | -3(3)    | 6(3)     |
| N(3)  | 70(9)    | 31(6)    | 48(8)    | 7(6)     | 20(7)    | 19(6)    |
| N(1)  | 60(8)    | 38(7)    | 26(6)    | -7(5)    | 18(5)    | -24(6)   |
| C(8)  | 38(9)    | 24(6)    | 23(3)    | -5(4)    | 12(5)    | -7(6)    |
| C(23) | 49(7)    | 28(5)    | 28(8)    | 6(5)     | 4(5)     | 13(3)    |

**Table S6. Hydrogen coordinates (  $\times 10^4$ ) and isotropic displacement parameters ( $\text{\AA}^2 \times 10^{-3}$ ) for hyvl12\_0m\_a.**

|        | x     | y     | z     | U(eq) |
|--------|-------|-------|-------|-------|
| H(2)   | 5808  | 6662  | 1467  | 31    |
| H(17)  | -707  | 6063  | 2758  | 29    |
| H(6)   | 1237  | 7083  | -649  | 32    |
| H(5)   | 2609  | 8289  | -1593 | 35    |
| H(18)  | -2129 | 7876  | 3648  | 34    |
| H(10)  | 5552  | 4267  | 2322  | 29    |
| H(13)  | 5678  | 7772  | 5720  | 28    |
| H(11)  | 7767  | 4478  | 4013  | 27    |
| H(14)  | 3438  | 7539  | 4027  | 28    |
| H(20)  | 419   | 10667 | 2665  | 45    |
| H(3)   | 7181  | 7843  | 517   | 29    |
| H(21)  | 1826  | 8849  | 1763  | 36    |
| H(8A)  | 7224  | 9246  | -814  | 45    |
| H(8B)  | 5476  | 9683  | -1533 | 45    |
| H(8C)  | 6169  | 8215  | -2044 | 45    |
| H(23A) | -3173 | 10637 | 3431  | 54    |
| H(23B) | -1413 | 11594 | 4052  | 54    |
| H(23C) | -2017 | 10517 | 4667  | 54    |

## 10. References

- (1) Barton, D., Bhatnagar, N., Finet, J-P., Motherwell, W. Pentavalent Organobismuth Reagents. Part VI. Comparative Migratory Aptitudes of Aryl Groups in the Arylation of Phenols and Enols by Pentavalent Bismuth Reagents. *Tetrahedron*, **1986**, 42(12), 3111-3122.
- (2) Matano, S.; Kinoshita, M.; Suzuki, H. Synthesis and Reactions of Some Crowded Triarylbiomuthines. *Bull. Chem. Soc. Jpn.*, **1992**, 65(12), 3504-3506.
- (3) Deacon, G.B.; Domagala, M.; Huber, F.; Rüther, R.; Felder, P.W. Synthesis of Arylbismuth (III) Sulfonates from Triarylbiomuth compounds and Arene Sulfonic Acids or Sulfur Trioxide. *Inorganic Chimica Acta*, **1986**, 113, 43-46.
- (4) Graßl, S.; Hamze, C.; Thaddäus, J. K.; Knochel, P. Copper-Catalyzed Electrophilic Thiolation of Organozinc Halides by Using *N*-Thiophthalimides Leading to Polyfunctional Thioethers. *Chem. Eur. J.*, **2019**, 25, 3752-3755.
- (5) Zhu, L.; Wehmeyer, R. M.; Rieke, R. D. The Direct Formation of Functionalized Alkyl(aryl)zinc Halides by Oxidative Addition of Highly Reactive Zinc with Organic Halides and Their Reactions with Acid Chlorides,  $\alpha,\beta$ -Unsaturated Ketones, and Allylic, Aryl, and Vinyl Halides. *J. Org. Chem.*, **1991**, 56, 1445-1453.
